# Supplementary material for: Extracellular signal-regulated kinase mediates chromatin rewiring and lineage transformation in lung cancer
Source: eLife journal article supplement (doi:10.7554/elife.66524), 2021-06-14
Supplement: supp [file elife-66524-supp-v1.zip]

Archive with 18 entries (18 files):
- elife_poa_e66524_Supplementary_file_1.xlsx
- elife_poa_e66524_Transparent_Reporting_File.pdf
- elife_poa_e66524_Figure_1_figure_supplement_1.tif
- elife_poa_e66524_Figure_1_figure_supplement_2.tif
- elife_poa_e66524_Figure_1_figure_supplement_3.tif
- elife_poa_e66524_Figure_2_figure_supplement_1.tif
- elife_poa_e66524_Figure_2_figure_supplement_2.tif
- elife_poa_e66524_Figure_2_figure_supplement_3.tif
- elife_poa_e66524_Figure_2_figure_supplement_4.tif
- elife_poa_e66524_Figure_2_figure_supplement_5.tif
- elife_poa_e66524_Figure_4_figure_supplement_1.tif
- elife_poa_e66524_Figure_5_figure_supplement_1.tif
- elife_poa_e66524_Figure_5_figure_supplement_2.tif
- elife_poa_e66524_Figure_6_figure_supplement_1.tif
- elife_poa_e66524_Figure_6_figure_supplement_2.tif
- elife_poa_e66524_Figure_6_figure_supplement_3.tif
- elife_poa_e66524_Figure_6_figure_supplement_4.tif
- elife_poa_e66524_Figure_6_figure_supplement_5.tif
