# Supplementary material for: Extracellular signal-regulated kinase mediates chromatin rewiring and lineage transformation in lung cancer
Source: eLife journal article supplement (doi:10.7554/elife.66524), 2021-06-14
Supplement: supp [file elife-66524-supp-v1.zip › elife_poa_e66524_Supplementary_file_1.xlsx]

## Sheet: summarizedDElist
Symbol	H82.EGFR.1	H82.EGFR.7	H82.KRAS.1	H82.KRAS.7	H2107.EGFR.1	H2107.EGFR.7	H2107.KRAS.1	H2107.KRAS.7	overlap
FAR2	NA	1.9254	1.36277	4.59708	NA	NA	1.2859	NA	4
DLK1	NA	NA	2.44103	2.39287	1.51787	NA	2.65828	NA	4
PDE3A	2.10263	NA	2.90887	2.29904	NA	NA	NA	NA	3
CCDC80	NA	2.00239	2.68365	4.3325	NA	NA	NA	NA	3
GAS7	NA	2.60116	2.80234	4.71342	NA	NA	NA	NA	3
HEY1	NA	2.71008	1.65532	4.86207	NA	NA	NA	NA	3
IL2RG	NA	2.01889	3.67243	4.84791	NA	NA	NA	NA	3
PCAT4	NA	2.51465	2.83199	3.98777	NA	NA	NA	NA	3
PDE6C	NA	2.81672	4.15464	4.28423	NA	NA	NA	NA	3
SRPX2	NA	1.42905	4.05805	4.43991	NA	NA	NA	NA	3
TRAV20	NA	2.44617	1.54036	3.34048	NA	NA	NA	NA	3
TRIM38	NA	1.92762	2.62989	3.93753	NA	NA	NA	NA	3
ATP2B1	NA	NA	1.7928	1.78561	NA	NA	0.809946	NA	3
NAB2	NA	NA	2.34217	1.42025	NA	NA	2.60113	NA	3
NSG1	NA	NA	-1.34672	-1.62751	NA	NA	-1.11681	NA	3
AKR1C3	NA	3.05661	NA	5.36777	NA	NA	NA	NA	2
AMBN	NA	2.39271	NA	2.81981	NA	NA	NA	NA	2
ATP6V0D2	NA	1.93895	NA	4.01253	NA	NA	NA	NA	2
CXCL10	NA	2.47104	NA	NA	NA	2.55701	NA	NA	2
LGI1	NA	3.50572	NA	7.34206	NA	NA	NA	NA	2
LINC00626	NA	2.51944	NA	4.41307	NA	NA	NA	NA	2
LRRC17	NA	2.81722	NA	6.98141	NA	NA	NA	NA	2
LTBP1	NA	2.75139	NA	5.59825	NA	NA	NA	NA	2
MSTN	NA	2.48185	NA	4.55055	NA	NA	NA	NA	2
P3H2	NA	1.92044	NA	4.95399	NA	NA	NA	NA	2
VIM-AS1	NA	1.54786	NA	3.86812	NA	NA	NA	NA	2
ALCAM	NA	NA	1.17708	2.07297	NA	NA	NA	NA	2
APCDD1L-AS1	NA	NA	1.43317	2.74242	NA	NA	NA	NA	2
ATP2B1-AS1	NA	NA	1.44857	1.23911	NA	NA	NA	NA	2
CCDC181	NA	NA	1.56377	2.15813	NA	NA	NA	NA	2
CHRNA3	NA	NA	2.69758	1.81238	NA	NA	NA	NA	2
CLGN	NA	NA	-1.2496	-1.19652	NA	NA	NA	NA	2
DNAJC22	NA	NA	2.36934	1.43521	NA	NA	NA	NA	2
DPP4	NA	NA	3.10705	4.52058	NA	NA	NA	NA	2
EMP3	NA	NA	1.82747	2.75032	NA	NA	NA	NA	2
FAM122B	NA	NA	1.33733	2.17073	NA	NA	NA	NA	2
FAM122C	NA	NA	1.30968	2.75672	NA	NA	NA	NA	2
FAM19A4	NA	NA	-1.44538	-2.49451	NA	NA	NA	NA	2
FOXP2	NA	NA	-1.24376	-1.6342	NA	NA	NA	NA	2
GABRR1	NA	NA	4.14394	4.12958	NA	NA	NA	NA	2
GGACT	NA	NA	1.38172	1.85039	NA	NA	NA	NA	2
GLRA1	NA	NA	-1.60936	-2.99189	NA	NA	NA	NA	2
GMFG	NA	NA	2.64307	3.31016	NA	NA	NA	NA	2
GPLD1	NA	NA	-1.94226	-2.1308	NA	NA	NA	NA	2
IL15	NA	NA	-1.40599	-2.4403	NA	NA	NA	NA	2
IL1RAP	NA	NA	2.04232	2.6805	NA	NA	NA	NA	2
IMPG2	NA	NA	-1.36268	-2.46649	NA	NA	NA	NA	2
ITGA5	NA	NA	1.38603	2.82464	NA	NA	NA	NA	2
JUP	NA	NA	1.15514	2.19041	NA	NA	NA	NA	2
KCNJ2	NA	NA	1.53321	1.9578	NA	NA	NA	NA	2
KIF5C	NA	NA	1.23646	1.12441	NA	NA	NA	NA	2
LHX4	NA	NA	-1.98451	-2.46475	NA	NA	NA	NA	2
LINC00682	NA	NA	-1.93936	-2.65473	NA	NA	NA	NA	2
LOC105373641	NA	NA	1.82082	5.19744	NA	NA	NA	NA	2
MCUB	NA	NA	1.5397	1.6106	NA	NA	NA	NA	2
METTL7B	NA	NA	1.9039	1.45444	NA	NA	NA	NA	2
MFGE8	NA	NA	1.12107	1.65389	NA	NA	NA	NA	2
MMD	NA	NA	-1.03577	-1.1234	NA	NA	NA	NA	2
MOSPD1	NA	NA	1.33468	1.76556	NA	NA	NA	NA	2
MPP4	NA	NA	2.36436	3.60565	NA	NA	NA	NA	2
NBEAL1	NA	NA	1.34056	1.89063	NA	NA	NA	NA	2
NHSL2	NA	NA	1.02372	1.74635	NA	NA	NA	NA	2
NPTX2	NA	NA	1.10743	NA	NA	NA	0.964053	NA	2
PAIP2B	NA	NA	-1.19436	-1.17755	NA	NA	NA	NA	2
PDE6A	NA	NA	-1.90648	-2.22564	NA	NA	NA	NA	2
PDLIM3	NA	NA	2.86089	1.77851	NA	NA	NA	NA	2
PDZRN4	NA	NA	2.18948	1.81918	NA	NA	NA	NA	2
PLA2G12B	NA	NA	-1.41563	-3.36881	NA	NA	NA	NA	2
PLIN3	NA	NA	1.40684	2.14557	NA	NA	NA	NA	2
RASGEF1B	NA	NA	-1.25629	-1.64366	NA	NA	NA	NA	2
RNVU1-14	NA	NA	-1.26844	-2.06107	NA	NA	NA	NA	2
S100A3	NA	NA	2.2433	1.27289	NA	NA	NA	NA	2
SCN5A	NA	NA	2.02263	2.07304	NA	NA	NA	NA	2
SEMA3D	NA	NA	2.79248	2.16137	NA	NA	NA	NA	2
SH2D2A	NA	NA	1.42946	1.87736	NA	NA	NA	NA	2
SMAP2	NA	NA	1.11835	0.826841	NA	NA	NA	NA	2
SNAI1	NA	NA	1.34835	1.37996	NA	NA	NA	NA	2
SNHG1	NA	NA	-1.09355	-1.24984	NA	NA	NA	NA	2
SPX	NA	NA	1.36642	2.13896	NA	NA	NA	NA	2
SRL	NA	NA	-1.64172	-1.52665	NA	NA	NA	NA	2
STOM	NA	NA	1.3886	2.66071	NA	NA	NA	NA	2
TIMP1	NA	NA	1.78621	2.46514	NA	NA	NA	NA	2
TLE4	NA	NA	1.39442	1.50819	NA	NA	NA	NA	2
TNFRSF1A	NA	NA	1.31789	1.69193	NA	NA	NA	NA	2
TP53INP1	NA	NA	-1.11542	NA	NA	NA	-1.13834	NA	2
UBE2J1	NA	NA	1.38427	1.20394	NA	NA	NA	NA	2
UPB1	NA	NA	1.91091	2.01572	NA	NA	NA	NA	2
VEGFC	NA	NA	2.50029	5.05337	NA	NA	NA	NA	2
VMO1	NA	NA	2.4586	4.39715	NA	NA	NA	NA	2
BAMBI	NA	NA	NA	3.13271	NA	1.11124	NA	NA	2
BCAM	NA	NA	NA	1.64149	NA	NA	-0.873383	NA	2
CASZ1	NA	NA	NA	-1.60994	NA	NA	-1.21707	NA	2
CSRNP3	NA	NA	NA	-0.829307	NA	NA	-1.0321	NA	2
DNER	NA	NA	NA	1.68141	NA	NA	-1.18208	NA	2
EPB41L4A-AS1	NA	NA	NA	-0.858296	NA	NA	-0.892176	NA	2
F3	NA	NA	NA	3.17572	NA	NA	1.97315	NA	2
FGFR1	NA	NA	NA	1.33616	NA	NA	1.01692	NA	2
FRMD5	NA	NA	NA	-0.982234	NA	NA	-0.896192	NA	2
LAPTM5	NA	NA	NA	3.39931	NA	NA	1.23141	NA	2
PNRC1	NA	NA	NA	1.012	NA	NA	-0.815936	NA	2
RUNX1T1	NA	NA	NA	-2.2643	NA	NA	-1.36196	NA	2
SH3KBP1	NA	NA	NA	0.959311	NA	NA	1.02287	NA	2
SLIT2	NA	NA	NA	1.17263	NA	NA	-1.14828	NA	2
SORCS2	NA	NA	NA	-1.4496	NA	NA	-0.941489	NA	2
SPSB1	NA	NA	NA	0.910263	NA	NA	1.12735	NA	2
ATP12A	NA	NA	NA	NA	1.75381	NA	3.1209	NA	2
FSTL5	NA	NA	NA	NA	1.52522	NA	1.62109	NA	2
GAD2	NA	NA	NA	NA	1.1572	NA	1.73616	NA	2
KCNK17	NA	NA	NA	NA	-1.42995	NA	-1.55216	NA	2
CDH11	NA	2.42852	NA	NA	NA	NA	NA	NA	1
ABCB1	NA	NA	1.33126	NA	NA	NA	NA	NA	1
ADAMTS4	NA	NA	1.60231	NA	NA	NA	NA	NA	1
APH1B	NA	NA	-0.916028	NA	NA	NA	NA	NA	1
AQP3	NA	NA	1.44231	NA	NA	NA	NA	NA	1
CD52	NA	NA	1.44945	NA	NA	NA	NA	NA	1
CDKN1A	NA	NA	1.48594	NA	NA	NA	NA	NA	1
CFAP45	NA	NA	1.16028	NA	NA	NA	NA	NA	1
CLYBL	NA	NA	-1.29195	NA	NA	NA	NA	NA	1
CMKLR1	NA	NA	1.11072	NA	NA	NA	NA	NA	1
DCUN1D3	NA	NA	1.08561	NA	NA	NA	NA	NA	1
EYS	NA	NA	-1.11992	NA	NA	NA	NA	NA	1
GBE1	NA	NA	1.43643	NA	NA	NA	NA	NA	1
GNAT2	NA	NA	-1.60172	NA	NA	NA	NA	NA	1
HIST1H2BM	NA	NA	-1.2642	NA	NA	NA	NA	NA	1
HS3ST3B1	NA	NA	1.78521	NA	NA	NA	NA	NA	1
IFI6	NA	NA	-1.5621	NA	NA	NA	NA	NA	1
IL12A	NA	NA	1.50681	NA	NA	NA	NA	NA	1
KCNK6	NA	NA	1.50161	NA	NA	NA	NA	NA	1
KCNMA1	NA	NA	1.36008	NA	NA	NA	NA	NA	1
KLF15	NA	NA	-1.55663	NA	NA	NA	NA	NA	1
LINC01551	NA	NA	-1.07507	NA	NA	NA	NA	NA	1
LOC100129046	NA	NA	1.06872	NA	NA	NA	NA	NA	1
LOC284578	NA	NA	2.64161	NA	NA	NA	NA	NA	1
LRRTM2	NA	NA	-1.32659	NA	NA	NA	NA	NA	1
METTL23	NA	NA	-0.956961	NA	NA	NA	NA	NA	1
MIA2	NA	NA	-1.05539	NA	NA	NA	NA	NA	1
MYOG	NA	NA	-1.14977	NA	NA	NA	NA	NA	1
NIPSNAP3A	NA	NA	-1.03831	NA	NA	NA	NA	NA	1
NRG1	NA	NA	1.66221	NA	NA	NA	NA	NA	1
OR2D2	NA	NA	1.75679	NA	NA	NA	NA	NA	1
PCDHB15	NA	NA	-1.36732	NA	NA	NA	NA	NA	1
PCDHB4	NA	NA	-1.13271	NA	NA	NA	NA	NA	1
PDE4A	NA	NA	1.06719	NA	NA	NA	NA	NA	1
PHKB	NA	NA	-0.950385	NA	NA	NA	NA	NA	1
PRKD1	NA	NA	-1.05468	NA	NA	NA	NA	NA	1
PTGS1	NA	NA	1.28886	NA	NA	NA	NA	NA	1
RARA	NA	NA	1.05823	NA	NA	NA	NA	NA	1
RASGRF1	NA	NA	1.46179	NA	NA	NA	NA	NA	1
RASSF2	NA	NA	-1.25179	NA	NA	NA	NA	NA	1
S100A5	NA	NA	1.91647	NA	NA	NA	NA	NA	1
SATB2	NA	NA	1.04894	NA	NA	NA	NA	NA	1
SMIM24	NA	NA	2.11494	NA	NA	NA	NA	NA	1
SNORA65	NA	NA	-1.13341	NA	NA	NA	NA	NA	1
STIM2	NA	NA	0.98054	NA	NA	NA	NA	NA	1
TANC2	NA	NA	1.05105	NA	NA	NA	NA	NA	1
TENM1	NA	NA	1.31958	NA	NA	NA	NA	NA	1
TESK2	NA	NA	-1.05732	NA	NA	NA	NA	NA	1
TMEM74	NA	NA	1.27728	NA	NA	NA	NA	NA	1
TRG-AS1	NA	NA	1.44206	NA	NA	NA	NA	NA	1
VPS37B	NA	NA	0.983775	NA	NA	NA	NA	NA	1
ZNF300P1	NA	NA	0.924937	NA	NA	NA	NA	NA	1
A2M	NA	NA	NA	2.13498	NA	NA	NA	NA	1
ABCA10	NA	NA	NA	-1.48249	NA	NA	NA	NA	1
ABCA5	NA	NA	NA	-2.01068	NA	NA	NA	NA	1
ABCC5	NA	NA	NA	1.87012	NA	NA	NA	NA	1
ABCC9	NA	NA	NA	-1.79337	NA	NA	NA	NA	1
ABI3	NA	NA	NA	1.25165	NA	NA	NA	NA	1
ABTB2	NA	NA	NA	0.999329	NA	NA	NA	NA	1
ACAT1	NA	NA	NA	-0.839592	NA	NA	NA	NA	1
ACP6	NA	NA	NA	1.39888	NA	NA	NA	NA	1
ACSL4	NA	NA	NA	0.998787	NA	NA	NA	NA	1
ACTN1	NA	NA	NA	1.33077	NA	NA	NA	NA	1
ADAM19	NA	NA	NA	2.35569	NA	NA	NA	NA	1
ADAMTS1	NA	NA	NA	2.52378	NA	NA	NA	NA	1
ADAMTS5	NA	NA	NA	2.58866	NA	NA	NA	NA	1
ADAMTS7P1	NA	NA	NA	0.893263	NA	NA	NA	NA	1
ADAMTSL5	NA	NA	NA	1.24755	NA	NA	NA	NA	1
ADGRG6	NA	NA	NA	1.28166	NA	NA	NA	NA	1
ADGRV1	NA	NA	NA	-1.52054	NA	NA	NA	NA	1
ADPRM	NA	NA	NA	-1.00726	NA	NA	NA	NA	1
AFF2	NA	NA	NA	1.20257	NA	NA	NA	NA	1
AGL	NA	NA	NA	-2.12216	NA	NA	NA	NA	1
AIG1	NA	NA	NA	1.89606	NA	NA	NA	NA	1
AIPL1	NA	NA	NA	-0.881486	NA	NA	NA	NA	1
AKAP1	NA	NA	NA	-0.804064	NA	NA	NA	NA	1
AKIP1	NA	NA	NA	1.07622	NA	NA	NA	NA	1
ALKBH2	NA	NA	NA	-0.861186	NA	NA	NA	NA	1
ALS2	NA	NA	NA	0.785157	NA	NA	NA	NA	1
AMER2	NA	NA	NA	-1.39143	NA	NA	NA	NA	1
ANK1	NA	NA	NA	-1.47541	NA	NA	NA	NA	1
ANK2	NA	NA	NA	-1.1223	NA	NA	NA	NA	1
ANKH	NA	NA	NA	-0.975447	NA	NA	NA	NA	1
ANKRD13A	NA	NA	NA	-1.02328	NA	NA	NA	NA	1
ANKRD36BP2	NA	NA	NA	-1.03851	NA	NA	NA	NA	1
ANKRD52	NA	NA	NA	1.0918	NA	NA	NA	NA	1
ANKRD6	NA	NA	NA	1.73774	NA	NA	NA	NA	1
ANXA2P3	NA	NA	NA	-2.01745	NA	NA	NA	NA	1
APBB2	NA	NA	NA	1.03338	NA	NA	NA	NA	1
APLP2	NA	NA	NA	1.22382	NA	NA	NA	NA	1
APP	NA	NA	NA	0.911534	NA	NA	NA	NA	1
ARHGAP23	NA	NA	NA	1.08646	NA	NA	NA	NA	1
ARHGAP26-IT1	NA	NA	NA	-1.46051	NA	NA	NA	NA	1
ARID5B	NA	NA	NA	3.39317	NA	NA	NA	NA	1
ARMC9	NA	NA	NA	0.986385	NA	NA	NA	NA	1
ASB15	NA	NA	NA	-1.6921	NA	NA	NA	NA	1
ASXL3	NA	NA	NA	-1.74632	NA	NA	NA	NA	1
ATG4A	NA	NA	NA	1.1974	NA	NA	NA	NA	1
ATOH7	NA	NA	NA	-4.0647	NA	NA	NA	NA	1
ATP11B	NA	NA	NA	0.986107	NA	NA	NA	NA	1
ATP2B4	NA	NA	NA	1.4019	NA	NA	NA	NA	1
ATXN1	NA	NA	NA	2.24402	NA	NA	NA	NA	1
AXL	NA	NA	NA	2.55444	NA	NA	NA	NA	1
B2M	NA	NA	NA	1.12406	NA	NA	NA	NA	1
BARHL2	NA	NA	NA	-1.34961	NA	NA	NA	NA	1
BBX	NA	NA	NA	1.052	NA	NA	NA	NA	1
BCAR3	NA	NA	NA	2.24082	NA	NA	NA	NA	1
BCL11B	NA	NA	NA	-1.20723	NA	NA	NA	NA	1
BLID	NA	NA	NA	1.08978	NA	NA	NA	NA	1
BLVRB	NA	NA	NA	1.20085	NA	NA	NA	NA	1
BMP1	NA	NA	NA	1.26875	NA	NA	NA	NA	1
BMP5	NA	NA	NA	-1.70854	NA	NA	NA	NA	1
BMPR1A	NA	NA	NA	1.44619	NA	NA	NA	NA	1
BOC	NA	NA	NA	1.30629	NA	NA	NA	NA	1
BPIFB4	NA	NA	NA	1.45534	NA	NA	NA	NA	1
BRDT	NA	NA	NA	1.13442	NA	NA	NA	NA	1
C1orf54	NA	NA	NA	2.04021	NA	NA	NA	NA	1
C3AR1	NA	NA	NA	1.49173	NA	NA	NA	NA	1
C4orf22	NA	NA	NA	1.23149	NA	NA	NA	NA	1
C9orf66	NA	NA	NA	-2.47194	NA	NA	NA	NA	1
CA3	NA	NA	NA	1.77267	NA	NA	NA	NA	1
CACNA1C	NA	NA	NA	-1.16289	NA	NA	NA	NA	1
CACNA2D1	NA	NA	NA	-0.910703	NA	NA	NA	NA	1
CACNB2	NA	NA	NA	-1.70605	NA	NA	NA	NA	1
CAMK1G	NA	NA	NA	1.94077	NA	NA	NA	NA	1
CAMKK1	NA	NA	NA	-1.21845	NA	NA	NA	NA	1
CAMKV	NA	NA	NA	-1.26228	NA	NA	NA	NA	1
CAP2	NA	NA	NA	4.75258	NA	NA	NA	NA	1
CAPN2	NA	NA	NA	1.49981	NA	NA	NA	NA	1
CAPN6	NA	NA	NA	2.02895	NA	NA	NA	NA	1
CASC1	NA	NA	NA	0.999886	NA	NA	NA	NA	1
CASP6	NA	NA	NA	1.03068	NA	NA	NA	NA	1
CBFB	NA	NA	NA	1.15721	NA	NA	NA	NA	1
CBR3	NA	NA	NA	1.14268	NA	NA	NA	NA	1
CBWD1	NA	NA	NA	-1.04217	NA	NA	NA	NA	1
CCDC144NL	NA	NA	NA	-1.71817	NA	NA	NA	NA	1
CCDC150	NA	NA	NA	-0.960641	NA	NA	NA	NA	1
CCDC177	NA	NA	NA	-1.06994	NA	NA	NA	NA	1
CCDC50	NA	NA	NA	1.45469	NA	NA	NA	NA	1
CD109	NA	NA	NA	2.51932	NA	NA	NA	NA	1
CD276	NA	NA	NA	1.15348	NA	NA	NA	NA	1
CDC45	NA	NA	NA	-1.00041	NA	NA	NA	NA	1
CDH12	NA	NA	NA	-1.91165	NA	NA	NA	NA	1
CDH17	NA	NA	NA	2.02982	NA	NA	NA	NA	1
CDH18	NA	NA	NA	-0.920769	NA	NA	NA	NA	1
CDHR1	NA	NA	NA	-1.16597	NA	NA	NA	NA	1
CDK14	NA	NA	NA	0.899835	NA	NA	NA	NA	1
CDK6	NA	NA	NA	2.18299	NA	NA	NA	NA	1
CDKAL1	NA	NA	NA	-1.51515	NA	NA	NA	NA	1
CEACAM1	NA	NA	NA	1.39067	NA	NA	NA	NA	1
CEP128	NA	NA	NA	-1.05901	NA	NA	NA	NA	1
CEP19	NA	NA	NA	1.37763	NA	NA	NA	NA	1
CERKL	NA	NA	NA	-1.91816	NA	NA	NA	NA	1
CERS6-AS1	NA	NA	NA	-1.49019	NA	NA	NA	NA	1
CFAP47	NA	NA	NA	2.00511	NA	NA	NA	NA	1
CGA	NA	NA	NA	4.26981	NA	NA	NA	NA	1
CHGA	NA	NA	NA	-1.5854	NA	NA	NA	NA	1
CHRNA9	NA	NA	NA	1.65371	NA	NA	NA	NA	1
CHRNB2	NA	NA	NA	-1.00185	NA	NA	NA	NA	1
CHST1	NA	NA	NA	1.47515	NA	NA	NA	NA	1
CHST3	NA	NA	NA	1.64549	NA	NA	NA	NA	1
CKMT1A	NA	NA	NA	-1.82492	NA	NA	NA	NA	1
CLDN1	NA	NA	NA	1.41032	NA	NA	NA	NA	1
CLEC7A	NA	NA	NA	3.9965	NA	NA	NA	NA	1
CLN6	NA	NA	NA	-1.2604	NA	NA	NA	NA	1
CLVS1	NA	NA	NA	-2.07777	NA	NA	NA	NA	1
CNGB3	NA	NA	NA	1.94864	NA	NA	NA	NA	1
CNN2	NA	NA	NA	2.14873	NA	NA	NA	NA	1
CNTLN	NA	NA	NA	-1.27161	NA	NA	NA	NA	1
CNTN1	NA	NA	NA	-1.47143	NA	NA	NA	NA	1
CNTN5	NA	NA	NA	-1.45232	NA	NA	NA	NA	1
CNTNAP2	NA	NA	NA	-1.35719	NA	NA	NA	NA	1
COL1A1	NA	NA	NA	1.45118	NA	NA	NA	NA	1
COL25A1	NA	NA	NA	1.2872	NA	NA	NA	NA	1
COQ10B	NA	NA	NA	1.3824	NA	NA	NA	NA	1
COX7C	NA	NA	NA	-0.924058	NA	NA	NA	NA	1
CPA4	NA	NA	NA	3.05841	NA	NA	NA	NA	1
CPLX3	NA	NA	NA	-2.00923	NA	NA	NA	NA	1
CRB1	NA	NA	NA	-1.20391	NA	NA	NA	NA	1
CREB3L1	NA	NA	NA	1.58252	NA	NA	NA	NA	1
CREM	NA	NA	NA	1.333	NA	NA	NA	NA	1
CRHBP	NA	NA	NA	2.4689	NA	NA	NA	NA	1
CRIM1	NA	NA	NA	1.40639	NA	NA	NA	NA	1
CRISP3	NA	NA	NA	2.68956	NA	NA	NA	NA	1
CRISPLD1	NA	NA	NA	1.0745	NA	NA	NA	NA	1
CRNN	NA	NA	NA	1.34178	NA	NA	NA	NA	1
CSRP1	NA	NA	NA	3.07065	NA	NA	NA	NA	1
CTH	NA	NA	NA	1.48374	NA	NA	NA	NA	1
CTSB	NA	NA	NA	1.00755	NA	NA	NA	NA	1
CTSO	NA	NA	NA	1.0267	NA	NA	NA	NA	1
CUBN	NA	NA	NA	2.50213	NA	NA	NA	NA	1
CXCL5	NA	NA	NA	1.81997	NA	NA	NA	NA	1
CXCL6	NA	NA	NA	2.97882	NA	NA	NA	NA	1
CXCR4	NA	NA	NA	2.51339	NA	NA	NA	NA	1
CYFIP1	NA	NA	NA	2.01377	NA	NA	NA	NA	1
CYFIP2	NA	NA	NA	-0.926117	NA	NA	NA	NA	1
CYP24A1	NA	NA	NA	1.46126	NA	NA	NA	NA	1
CYP3A5	NA	NA	NA	1.12506	NA	NA	NA	NA	1
DACH2	NA	NA	NA	-3.05134	NA	NA	NA	NA	1
DCAF5	NA	NA	NA	0.969551	NA	NA	NA	NA	1
DCC	NA	NA	NA	0.95612	NA	NA	NA	NA	1
DCT	NA	NA	NA	-2.74441	NA	NA	NA	NA	1
DDAH2	NA	NA	NA	0.900305	NA	NA	NA	NA	1
DDR2	NA	NA	NA	1.29093	NA	NA	NA	NA	1
DERA	NA	NA	NA	-0.875473	NA	NA	NA	NA	1
DGAT2L6	NA	NA	NA	2.73608	NA	NA	NA	NA	1
DHRS3	NA	NA	NA	3.1523	NA	NA	NA	NA	1
DIO2	NA	NA	NA	1.74885	NA	NA	NA	NA	1
DISP3	NA	NA	NA	-1.13227	NA	NA	NA	NA	1
DKK1	NA	NA	NA	3.71069	NA	NA	NA	NA	1
DLG5	NA	NA	NA	1.83334	NA	NA	NA	NA	1
DMP1	NA	NA	NA	1.07999	NA	NA	NA	NA	1
DNAJC5B	NA	NA	NA	3.18625	NA	NA	NA	NA	1
DOC2B	NA	NA	NA	-2.13248	NA	NA	NA	NA	1
DOCK6	NA	NA	NA	2.00845	NA	NA	NA	NA	1
DOK4	NA	NA	NA	1.60829	NA	NA	NA	NA	1
DPYSL3	NA	NA	NA	0.940709	NA	NA	NA	NA	1
DPYSL5	NA	NA	NA	-1.05341	NA	NA	NA	NA	1
DSTNP2	NA	NA	NA	1.13582	NA	NA	NA	NA	1
DUSP13	NA	NA	NA	1.11742	NA	NA	NA	NA	1
DUSP16	NA	NA	NA	0.923246	NA	NA	NA	NA	1
DYNC1I1	NA	NA	NA	1.57942	NA	NA	NA	NA	1
EBF3	NA	NA	NA	-1.75154	NA	NA	NA	NA	1
ECE1	NA	NA	NA	1.38525	NA	NA	NA	NA	1
EDEM2	NA	NA	NA	0.886239	NA	NA	NA	NA	1
EFEMP2	NA	NA	NA	1.16323	NA	NA	NA	NA	1
EFHB	NA	NA	NA	1.06328	NA	NA	NA	NA	1
EFHD2	NA	NA	NA	1.08626	NA	NA	NA	NA	1
EFR3B	NA	NA	NA	1.71255	NA	NA	NA	NA	1
EGFEM1P	NA	NA	NA	-1.74784	NA	NA	NA	NA	1
EHD2	NA	NA	NA	3.04186	NA	NA	NA	NA	1
ELMO1	NA	NA	NA	-1.03139	NA	NA	NA	NA	1
EMCN	NA	NA	NA	1.54075	NA	NA	NA	NA	1
EML5	NA	NA	NA	-1.31427	NA	NA	NA	NA	1
EMP2	NA	NA	NA	1.46416	NA	NA	NA	NA	1
ENOX1	NA	NA	NA	-0.86116	NA	NA	NA	NA	1
ENPP7P13	NA	NA	NA	-1.60204	NA	NA	NA	NA	1
EPB41L2	NA	NA	NA	1.10964	NA	NA	NA	NA	1
EPDR1	NA	NA	NA	1.25324	NA	NA	NA	NA	1
EPHA1-AS1	NA	NA	NA	1.25132	NA	NA	NA	NA	1
EPHB1	NA	NA	NA	1.86039	NA	NA	NA	NA	1
ERVH-3	NA	NA	NA	2.66104	NA	NA	NA	NA	1
ERVMER61-1	NA	NA	NA	-1.47668	NA	NA	NA	NA	1
ESYT1	NA	NA	NA	0.939276	NA	NA	NA	NA	1
ETFA	NA	NA	NA	-0.955622	NA	NA	NA	NA	1
ETV3L	NA	NA	NA	1.75281	NA	NA	NA	NA	1
ETV6	NA	NA	NA	2.06738	NA	NA	NA	NA	1
EXOSC2	NA	NA	NA	-0.856351	NA	NA	NA	NA	1
EXT1	NA	NA	NA	1.38695	NA	NA	NA	NA	1
F2RL2	NA	NA	NA	2.33667	NA	NA	NA	NA	1
FAM133A	NA	NA	NA	1.60799	NA	NA	NA	NA	1
FAM155A	NA	NA	NA	1.48615	NA	NA	NA	NA	1
FAM155A-IT1	NA	NA	NA	1.49993	NA	NA	NA	NA	1
FAM162B	NA	NA	NA	-1.081	NA	NA	NA	NA	1
FAM198B	NA	NA	NA	1.45598	NA	NA	NA	NA	1
FAM19A3	NA	NA	NA	1.16764	NA	NA	NA	NA	1
FAM46C	NA	NA	NA	1.16605	NA	NA	NA	NA	1
FAM78B	NA	NA	NA	-1.17091	NA	NA	NA	NA	1
FAM87A	NA	NA	NA	-0.898948	NA	NA	NA	NA	1
FAT4	NA	NA	NA	1.19543	NA	NA	NA	NA	1
FAXDC2	NA	NA	NA	1.3006	NA	NA	NA	NA	1
FBN1	NA	NA	NA	1.36257	NA	NA	NA	NA	1
FBXL13	NA	NA	NA	1.25	NA	NA	NA	NA	1
FBXO10	NA	NA	NA	-1.02316	NA	NA	NA	NA	1
FBXO36	NA	NA	NA	0.833015	NA	NA	NA	NA	1
FEZF1	NA	NA	NA	3.41128	NA	NA	NA	NA	1
FEZF1-AS1	NA	NA	NA	3.64512	NA	NA	NA	NA	1
FIBIN	NA	NA	NA	4.22779	NA	NA	NA	NA	1
FLNA	NA	NA	NA	1.41697	NA	NA	NA	NA	1
FLNC	NA	NA	NA	1.98101	NA	NA	NA	NA	1
FLRT2	NA	NA	NA	2.16837	NA	NA	NA	NA	1
FMOD	NA	NA	NA	1.28779	NA	NA	NA	NA	1
FNDC3A	NA	NA	NA	1.00202	NA	NA	NA	NA	1
FNDC3B	NA	NA	NA	2.01272	NA	NA	NA	NA	1
FNIP2	NA	NA	NA	-0.794382	NA	NA	NA	NA	1
FOSB	NA	NA	NA	1.73282	NA	NA	NA	NA	1
FOXA1	NA	NA	NA	-0.997858	NA	NA	NA	NA	1
FOXD4	NA	NA	NA	-1.6284	NA	NA	NA	NA	1
FRA10AC1	NA	NA	NA	1.15823	NA	NA	NA	NA	1
FREM2	NA	NA	NA	1.40969	NA	NA	NA	NA	1
FRMPD4	NA	NA	NA	-1.24296	NA	NA	NA	NA	1
FSTL4	NA	NA	NA	-1.29439	NA	NA	NA	NA	1
FURIN	NA	NA	NA	2.09251	NA	NA	NA	NA	1
FZD7	NA	NA	NA	1.8479	NA	NA	NA	NA	1
GAB2	NA	NA	NA	1.2302	NA	NA	NA	NA	1
GABRA2	NA	NA	NA	2.72058	NA	NA	NA	NA	1
GABRA4	NA	NA	NA	1.60585	NA	NA	NA	NA	1
GABRR3	NA	NA	NA	-1.1284	NA	NA	NA	NA	1
GALM	NA	NA	NA	1.08646	NA	NA	NA	NA	1
GALNT13	NA	NA	NA	-1.15441	NA	NA	NA	NA	1
GALNT16	NA	NA	NA	-1.3	NA	NA	NA	NA	1
GALNT6	NA	NA	NA	0.881834	NA	NA	NA	NA	1
GAREM1	NA	NA	NA	1.81547	NA	NA	NA	NA	1
GARNL3	NA	NA	NA	-1.29315	NA	NA	NA	NA	1
GATA2	NA	NA	NA	1.82681	NA	NA	NA	NA	1
GCH1	NA	NA	NA	1.45733	NA	NA	NA	NA	1
GCNT1	NA	NA	NA	1.64595	NA	NA	NA	NA	1
GDAP1	NA	NA	NA	-0.985101	NA	NA	NA	NA	1
GFY	NA	NA	NA	1.49803	NA	NA	NA	NA	1
GIPC3	NA	NA	NA	1.12889	NA	NA	NA	NA	1
GJA1	NA	NA	NA	3.54135	NA	NA	NA	NA	1
GJA5	NA	NA	NA	1.26431	NA	NA	NA	NA	1
GLI3	NA	NA	NA	1.35749	NA	NA	NA	NA	1
GNA15	NA	NA	NA	1.01112	NA	NA	NA	NA	1
GNB3	NA	NA	NA	-1.01358	NA	NA	NA	NA	1
GNG11	NA	NA	NA	3.32995	NA	NA	NA	NA	1
GNG2	NA	NA	NA	2.21774	NA	NA	NA	NA	1
GPR180	NA	NA	NA	-1.13344	NA	NA	NA	NA	1
GPR85	NA	NA	NA	-1.09971	NA	NA	NA	NA	1
GPRC5B	NA	NA	NA	1.09731	NA	NA	NA	NA	1
GPSM3	NA	NA	NA	0.909546	NA	NA	NA	NA	1
GRAMD2B	NA	NA	NA	0.933287	NA	NA	NA	NA	1
GRIA2	NA	NA	NA	-1.96352	NA	NA	NA	NA	1
GRIK1	NA	NA	NA	1.18496	NA	NA	NA	NA	1
GSTA2	NA	NA	NA	1.34756	NA	NA	NA	NA	1
GULP1	NA	NA	NA	1.92627	NA	NA	NA	NA	1
GUSBP2	NA	NA	NA	-0.971719	NA	NA	NA	NA	1
HCG20	NA	NA	NA	1.05962	NA	NA	NA	NA	1
HCN1	NA	NA	NA	1.0127	NA	NA	NA	NA	1
HEY2	NA	NA	NA	1.59242	NA	NA	NA	NA	1
HEYL	NA	NA	NA	1.16156	NA	NA	NA	NA	1
HHIP	NA	NA	NA	-1.14128	NA	NA	NA	NA	1
HILPDA	NA	NA	NA	-0.940611	NA	NA	NA	NA	1
HIST1H2AJ	NA	NA	NA	-2.31954	NA	NA	NA	NA	1
HIST1H2BG	NA	NA	NA	-1.10594	NA	NA	NA	NA	1
HIST1H2BL	NA	NA	NA	-1.0732	NA	NA	NA	NA	1
HIST3H2BB	NA	NA	NA	-1.90267	NA	NA	NA	NA	1
HKDC1	NA	NA	NA	2.97896	NA	NA	NA	NA	1
HLA-DQB1	NA	NA	NA	-0.977129	NA	NA	NA	NA	1
HNMT	NA	NA	NA	3.61398	NA	NA	NA	NA	1
HOXA1	NA	NA	NA	1.41207	NA	NA	NA	NA	1
HOXA13	NA	NA	NA	-1.52162	NA	NA	NA	NA	1
HOXB2	NA	NA	NA	2.77263	NA	NA	NA	NA	1
HSD17B2	NA	NA	NA	-4.31193	NA	NA	NA	NA	1
HSD17B3	NA	NA	NA	2.15315	NA	NA	NA	NA	1
HSPA12A	NA	NA	NA	-2.03878	NA	NA	NA	NA	1
HSPB1	NA	NA	NA	1.27519	NA	NA	NA	NA	1
HTR2A	NA	NA	NA	1.1854	NA	NA	NA	NA	1
HTR3E	NA	NA	NA	1.19689	NA	NA	NA	NA	1
HYKK	NA	NA	NA	1.60799	NA	NA	NA	NA	1
IFI44	NA	NA	NA	1.22916	NA	NA	NA	NA	1
IFITM1	NA	NA	NA	2.19084	NA	NA	NA	NA	1
IFT172	NA	NA	NA	-0.843854	NA	NA	NA	NA	1
IGFBP4	NA	NA	NA	1.85337	NA	NA	NA	NA	1
IGSF11	NA	NA	NA	-1.44547	NA	NA	NA	NA	1
IGSF21	NA	NA	NA	-1.42911	NA	NA	NA	NA	1
IGSF9	NA	NA	NA	1.10316	NA	NA	NA	NA	1
IL1A	NA	NA	NA	1.59509	NA	NA	NA	NA	1
IL23R	NA	NA	NA	1.58354	NA	NA	NA	NA	1
INAFM2	NA	NA	NA	0.945962	NA	NA	NA	NA	1
INSM2	NA	NA	NA	-1.54625	NA	NA	NA	NA	1
IRF2	NA	NA	NA	0.967094	NA	NA	NA	NA	1
IRF2BPL	NA	NA	NA	0.953518	NA	NA	NA	NA	1
ISL2	NA	NA	NA	-0.949322	NA	NA	NA	NA	1
ISOC1	NA	NA	NA	-0.985612	NA	NA	NA	NA	1
JAK1	NA	NA	NA	1.38788	NA	NA	NA	NA	1
KCNA4	NA	NA	NA	-2.24036	NA	NA	NA	NA	1
KCNAB1	NA	NA	NA	1.28528	NA	NA	NA	NA	1
KCNH2	NA	NA	NA	1.04716	NA	NA	NA	NA	1
KCNH4	NA	NA	NA	-0.912131	NA	NA	NA	NA	1
KCTD13	NA	NA	NA	0.937526	NA	NA	NA	NA	1
KDR	NA	NA	NA	1.43551	NA	NA	NA	NA	1
KIAA1217	NA	NA	NA	0.954908	NA	NA	NA	NA	1
KIF21A	NA	NA	NA	1.06138	NA	NA	NA	NA	1
KIRREL1	NA	NA	NA	1.60122	NA	NA	NA	NA	1
KLHL14	NA	NA	NA	1.39167	NA	NA	NA	NA	1
KLHL4	NA	NA	NA	1.95363	NA	NA	NA	NA	1
KLHL41	NA	NA	NA	3.0717	NA	NA	NA	NA	1
KRT71	NA	NA	NA	-0.932525	NA	NA	NA	NA	1
L3MBTL3	NA	NA	NA	1.48702	NA	NA	NA	NA	1
LCAT	NA	NA	NA	1.02427	NA	NA	NA	NA	1
LGALS1	NA	NA	NA	2.28634	NA	NA	NA	NA	1
LGR4	NA	NA	NA	1.38854	NA	NA	NA	NA	1
LIFR	NA	NA	NA	2.10352	NA	NA	NA	NA	1
LIMA1	NA	NA	NA	2.35833	NA	NA	NA	NA	1
LIMD1	NA	NA	NA	1.24257	NA	NA	NA	NA	1
LINC00189	NA	NA	NA	1.48172	NA	NA	NA	NA	1
LINC00463	NA	NA	NA	-1.76753	NA	NA	NA	NA	1
LINC00892	NA	NA	NA	1.06733	NA	NA	NA	NA	1
LINC01053	NA	NA	NA	-3.33126	NA	NA	NA	NA	1
LINC01060	NA	NA	NA	2.45036	NA	NA	NA	NA	1
LINC01094	NA	NA	NA	1.02752	NA	NA	NA	NA	1
LINC01204	NA	NA	NA	2.92907	NA	NA	NA	NA	1
LINC01226	NA	NA	NA	1.17116	NA	NA	NA	NA	1
LINC01605	NA	NA	NA	1.30613	NA	NA	NA	NA	1
LINC01607	NA	NA	NA	2.39373	NA	NA	NA	NA	1
LINC01630	NA	NA	NA	1.41973	NA	NA	NA	NA	1
LINC01655	NA	NA	NA	0.982166	NA	NA	NA	NA	1
LINC01708	NA	NA	NA	-1.93616	NA	NA	NA	NA	1
LINC01821	NA	NA	NA	-1.22296	NA	NA	NA	NA	1
LINC01881	NA	NA	NA	-1.12601	NA	NA	NA	NA	1
LINC01915	NA	NA	NA	-1.98357	NA	NA	NA	NA	1
LINC01920	NA	NA	NA	3.18629	NA	NA	NA	NA	1
LINC02316	NA	NA	NA	-1.30043	NA	NA	NA	NA	1
LINC02432	NA	NA	NA	-1.66708	NA	NA	NA	NA	1
LMOD1	NA	NA	NA	-1.1446	NA	NA	NA	NA	1
LNPEP	NA	NA	NA	1.73216	NA	NA	NA	NA	1
LOC100130476	NA	NA	NA	2.38758	NA	NA	NA	NA	1
LOC100134040	NA	NA	NA	-1.27708	NA	NA	NA	NA	1
LOC100505817	NA	NA	NA	5.32472	NA	NA	NA	NA	1
LOC100506790	NA	NA	NA	1.04545	NA	NA	NA	NA	1
LOC101927216	NA	NA	NA	1.7561	NA	NA	NA	NA	1
LOC101927355	NA	NA	NA	-1.42962	NA	NA	NA	NA	1
LOC101927367	NA	NA	NA	-1.57149	NA	NA	NA	NA	1
LOC101927400	NA	NA	NA	-2.05012	NA	NA	NA	NA	1
LOC101927497	NA	NA	NA	1.631	NA	NA	NA	NA	1
LOC101927551	NA	NA	NA	-0.962809	NA	NA	NA	NA	1
LOC101927877	NA	NA	NA	-0.937605	NA	NA	NA	NA	1
LOC101928185	NA	NA	NA	-1.05896	NA	NA	NA	NA	1
LOC101928273	NA	NA	NA	-2.05261	NA	NA	NA	NA	1
LOC101928277	NA	NA	NA	-3.27475	NA	NA	NA	NA	1
LOC101929457	NA	NA	NA	-1.25844	NA	NA	NA	NA	1
LOC102724124	NA	NA	NA	2.75264	NA	NA	NA	NA	1
LOC105369454	NA	NA	NA	-3.06874	NA	NA	NA	NA	1
LOC105369826	NA	NA	NA	-2.38615	NA	NA	NA	NA	1
LOC105369928	NA	NA	NA	1.59529	NA	NA	NA	NA	1
LOC105370518	NA	NA	NA	-2.23829	NA	NA	NA	NA	1
LOC105370714	NA	NA	NA	2.34615	NA	NA	NA	NA	1
LOC105371833	NA	NA	NA	-1.46053	NA	NA	NA	NA	1
LOC105373411	NA	NA	NA	-2.45804	NA	NA	NA	NA	1
LOC105374425	NA	NA	NA	-2.61171	NA	NA	NA	NA	1
LOC105376066	NA	NA	NA	-1.19667	NA	NA	NA	NA	1
LOC105376174	NA	NA	NA	-2.43337	NA	NA	NA	NA	1
LOC105376635	NA	NA	NA	1.53148	NA	NA	NA	NA	1
LOC105378836	NA	NA	NA	-1.09906	NA	NA	NA	NA	1
LOC105378963	NA	NA	NA	1.60225	NA	NA	NA	NA	1
LOC105379386	NA	NA	NA	2.13359	NA	NA	NA	NA	1
LOC105379387	NA	NA	NA	1.3183	NA	NA	NA	NA	1
LOC157273	NA	NA	NA	2.1665	NA	NA	NA	NA	1
LOC389765	NA	NA	NA	-0.876572	NA	NA	NA	NA	1
LOC650226	NA	NA	NA	1.00775	NA	NA	NA	NA	1
LOC654342	NA	NA	NA	1.23393	NA	NA	NA	NA	1
LOXL2	NA	NA	NA	1.14967	NA	NA	NA	NA	1
LRFN1	NA	NA	NA	-1.11618	NA	NA	NA	NA	1
LRP8	NA	NA	NA	0.822502	NA	NA	NA	NA	1
LRRC1	NA	NA	NA	-1.24389	NA	NA	NA	NA	1
LYPD6B	NA	NA	NA	1.32	NA	NA	NA	NA	1
MAK	NA	NA	NA	-0.970085	NA	NA	NA	NA	1
MANSC1	NA	NA	NA	1.32113	NA	NA	NA	NA	1
MAP1LC3C	NA	NA	NA	1.16744	NA	NA	NA	NA	1
MAP3K8	NA	NA	NA	1.59343	NA	NA	NA	NA	1
2004-03-01	NA	NA	NA	2.59974	NA	NA	NA	NA	1
MCC	NA	NA	NA	-1.49312	NA	NA	NA	NA	1
MEIS3P1	NA	NA	NA	1.03067	NA	NA	NA	NA	1
METTL24	NA	NA	NA	-1.25313	NA	NA	NA	NA	1
MFAP5	NA	NA	NA	2.54987	NA	NA	NA	NA	1
MICB	NA	NA	NA	0.858679	NA	NA	NA	NA	1
MIR3666	NA	NA	NA	-1.18168	NA	NA	NA	NA	1
MIR4255	NA	NA	NA	-1.2687	NA	NA	NA	NA	1
MIR4500HG	NA	NA	NA	-1.25199	NA	NA	NA	NA	1
MIR4504	NA	NA	NA	-1.34831	NA	NA	NA	NA	1
MIR570HG	NA	NA	NA	-0.980154	NA	NA	NA	NA	1
MIR604	NA	NA	NA	1.40745	NA	NA	NA	NA	1
MKLN1-AS	NA	NA	NA	1.12646	NA	NA	NA	NA	1
MLKL	NA	NA	NA	2.03278	NA	NA	NA	NA	1
MMAB	NA	NA	NA	-0.937046	NA	NA	NA	NA	1
MMP24	NA	NA	NA	-1.18692	NA	NA	NA	NA	1
MMP3	NA	NA	NA	2.11642	NA	NA	NA	NA	1
MMP9	NA	NA	NA	1.20163	NA	NA	NA	NA	1
MORC4	NA	NA	NA	1.45779	NA	NA	NA	NA	1
MPP7	NA	NA	NA	-1.23138	NA	NA	NA	NA	1
MRLN	NA	NA	NA	-4.00328	NA	NA	NA	NA	1
MVB12B	NA	NA	NA	-0.958642	NA	NA	NA	NA	1
MYL1	NA	NA	NA	1.84256	NA	NA	NA	NA	1
MYLPF	NA	NA	NA	1.12356	NA	NA	NA	NA	1
MYO10	NA	NA	NA	1.50909	NA	NA	NA	NA	1
MYOD1	NA	NA	NA	1.54407	NA	NA	NA	NA	1
MYORG	NA	NA	NA	0.78634	NA	NA	NA	NA	1
MYOZ2	NA	NA	NA	2.33027	NA	NA	NA	NA	1
MYPN	NA	NA	NA	1.89741	NA	NA	NA	NA	1
NAV1	NA	NA	NA	1.42893	NA	NA	NA	NA	1
NAV2-AS2	NA	NA	NA	1.83487	NA	NA	NA	NA	1
NCBP2-AS2	NA	NA	NA	-0.805929	NA	NA	NA	NA	1
NCKAP5	NA	NA	NA	-0.834142	NA	NA	NA	NA	1
NDEL1	NA	NA	NA	1.38093	NA	NA	NA	NA	1
NDFIP2	NA	NA	NA	1.07836	NA	NA	NA	NA	1
NDRG4	NA	NA	NA	-1.04849	NA	NA	NA	NA	1
NDUFA9	NA	NA	NA	-0.892313	NA	NA	NA	NA	1
NDUFS4	NA	NA	NA	-1.13502	NA	NA	NA	NA	1
NEB	NA	NA	NA	2.70386	NA	NA	NA	NA	1
NEBL	NA	NA	NA	1.05164	NA	NA	NA	NA	1
NELL2	NA	NA	NA	-1.54798	NA	NA	NA	NA	1
NEUROD1	NA	NA	NA	-1.64268	NA	NA	NA	NA	1
NEUROD4	NA	NA	NA	-1.45002	NA	NA	NA	NA	1
NEUROG1	NA	NA	NA	-1.92698	NA	NA	NA	NA	1
NFE2L2	NA	NA	NA	0.886202	NA	NA	NA	NA	1
NFKB2	NA	NA	NA	1.10244	NA	NA	NA	NA	1
NHS	NA	NA	NA	1.2883	NA	NA	NA	NA	1
NISCH	NA	NA	NA	-0.989437	NA	NA	NA	NA	1
NIT2	NA	NA	NA	-0.923213	NA	NA	NA	NA	1
NOG	NA	NA	NA	1.91602	NA	NA	NA	NA	1
NOS2	NA	NA	NA	1.44569	NA	NA	NA	NA	1
NPS	NA	NA	NA	-3.10154	NA	NA	NA	NA	1
NPTX1	NA	NA	NA	-1.98692	NA	NA	NA	NA	1
NPY1R	NA	NA	NA	2.62273	NA	NA	NA	NA	1
NQO2	NA	NA	NA	0.962154	NA	NA	NA	NA	1
NR4A2	NA	NA	NA	2.16214	NA	NA	NA	NA	1
NRG2	NA	NA	NA	-1.49765	NA	NA	NA	NA	1
NTS	NA	NA	NA	1.4381	NA	NA	NA	NA	1
NUAK2	NA	NA	NA	1.72585	NA	NA	NA	NA	1
NUP62CL	NA	NA	NA	2.17102	NA	NA	NA	NA	1
NXPH4	NA	NA	NA	-0.959072	NA	NA	NA	NA	1
OGFRL1	NA	NA	NA	0.954396	NA	NA	NA	NA	1
OR10J3	NA	NA	NA	1.15705	NA	NA	NA	NA	1
OR6C4	NA	NA	NA	1.70777	NA	NA	NA	NA	1
OSBPL6	NA	NA	NA	1.33258	NA	NA	NA	NA	1
OSMR	NA	NA	NA	3.01128	NA	NA	NA	NA	1
OVAAL	NA	NA	NA	1.29459	NA	NA	NA	NA	1
P2RY1	NA	NA	NA	1.21989	NA	NA	NA	NA	1
P3H2-AS1	NA	NA	NA	1.21994	NA	NA	NA	NA	1
PAPSS2	NA	NA	NA	1.78182	NA	NA	NA	NA	1
PARD3	NA	NA	NA	1.10686	NA	NA	NA	NA	1
PCBP3	NA	NA	NA	0.991855	NA	NA	NA	NA	1
PCDH17	NA	NA	NA	1.96674	NA	NA	NA	NA	1
PCLAF	NA	NA	NA	-0.918422	NA	NA	NA	NA	1
PCNX2	NA	NA	NA	1.21279	NA	NA	NA	NA	1
PCTP	NA	NA	NA	1.19512	NA	NA	NA	NA	1
PCYT1B	NA	NA	NA	1.37134	NA	NA	NA	NA	1
PDC	NA	NA	NA	-1.98618	NA	NA	NA	NA	1
PDE4B	NA	NA	NA	0.98093	NA	NA	NA	NA	1
PDE6H	NA	NA	NA	1.49307	NA	NA	NA	NA	1
PDGFRB	NA	NA	NA	1.25909	NA	NA	NA	NA	1
PDLIM5	NA	NA	NA	2.07258	NA	NA	NA	NA	1
PEAR1	NA	NA	NA	1.19652	NA	NA	NA	NA	1
PER1	NA	NA	NA	1.15345	NA	NA	NA	NA	1
PFKFB3	NA	NA	NA	2.27374	NA	NA	NA	NA	1
PHACTR2	NA	NA	NA	1.44396	NA	NA	NA	NA	1
PHF19	NA	NA	NA	0.817067	NA	NA	NA	NA	1
PHOX2B	NA	NA	NA	-2.30645	NA	NA	NA	NA	1
PI3	NA	NA	NA	1.44142	NA	NA	NA	NA	1
PI4K2A	NA	NA	NA	0.982888	NA	NA	NA	NA	1
PIAS3	NA	NA	NA	1.17686	NA	NA	NA	NA	1
PIK3AP1	NA	NA	NA	1.32586	NA	NA	NA	NA	1
PIK3CA	NA	NA	NA	1.02589	NA	NA	NA	NA	1
PINX1	NA	NA	NA	-1.01003	NA	NA	NA	NA	1
PIWIL4	NA	NA	NA	1.03593	NA	NA	NA	NA	1
PLA2G4A	NA	NA	NA	-1.41999	NA	NA	NA	NA	1
PLBD1	NA	NA	NA	1.29372	NA	NA	NA	NA	1
PLCH2	NA	NA	NA	-1.33251	NA	NA	NA	NA	1
PLD6	NA	NA	NA	-0.925329	NA	NA	NA	NA	1
PLPPR4	NA	NA	NA	-0.948211	NA	NA	NA	NA	1
PLPPR5	NA	NA	NA	-1.67455	NA	NA	NA	NA	1
PLTP	NA	NA	NA	1.13016	NA	NA	NA	NA	1
PLVAP	NA	NA	NA	4.01167	NA	NA	NA	NA	1
PML	NA	NA	NA	1.1552	NA	NA	NA	NA	1
PMP22	NA	NA	NA	1.60146	NA	NA	NA	NA	1
PODXL	NA	NA	NA	1.71595	NA	NA	NA	NA	1
POU5F1B	NA	NA	NA	-2.07661	NA	NA	NA	NA	1
PPP1R17	NA	NA	NA	-1.13789	NA	NA	NA	NA	1
PPP1R2P3	NA	NA	NA	1.08422	NA	NA	NA	NA	1
PRKAG2	NA	NA	NA	0.833933	NA	NA	NA	NA	1
PRKCA	NA	NA	NA	1.12477	NA	NA	NA	NA	1
PRKCQ	NA	NA	NA	1.36733	NA	NA	NA	NA	1
PROX1	NA	NA	NA	1.60295	NA	NA	NA	NA	1
PRRX2	NA	NA	NA	1.24716	NA	NA	NA	NA	1
PRSS35	NA	NA	NA	1.24312	NA	NA	NA	NA	1
PRTG	NA	NA	NA	2.32406	NA	NA	NA	NA	1
PSPC1	NA	NA	NA	-1.00092	NA	NA	NA	NA	1
PSTPIP2	NA	NA	NA	1.43813	NA	NA	NA	NA	1
PTGER2	NA	NA	NA	1.44603	NA	NA	NA	NA	1
PTPRK	NA	NA	NA	1.12197	NA	NA	NA	NA	1
PTPRM	NA	NA	NA	1.46045	NA	NA	NA	NA	1
PYGL	NA	NA	NA	1.61908	NA	NA	NA	NA	1
PYGM	NA	NA	NA	0.914167	NA	NA	NA	NA	1
RAB39B	NA	NA	NA	-1.05975	NA	NA	NA	NA	1
RABEPK	NA	NA	NA	-1.27109	NA	NA	NA	NA	1
RALB	NA	NA	NA	1.00904	NA	NA	NA	NA	1
RALYL	NA	NA	NA	-1.54306	NA	NA	NA	NA	1
RAPGEF5	NA	NA	NA	-1.63779	NA	NA	NA	NA	1
RASD1	NA	NA	NA	-1.32737	NA	NA	NA	NA	1
RASSF5	NA	NA	NA	1.1917	NA	NA	NA	NA	1
RBFOX2	NA	NA	NA	1.15197	NA	NA	NA	NA	1
RBM24	NA	NA	NA	1.62044	NA	NA	NA	NA	1
RBMS3	NA	NA	NA	1.7394	NA	NA	NA	NA	1
RBP7	NA	NA	NA	-1.14619	NA	NA	NA	NA	1
RBPMS	NA	NA	NA	1.21751	NA	NA	NA	NA	1
RCAN3	NA	NA	NA	1.53665	NA	NA	NA	NA	1
RCOR1	NA	NA	NA	0.88911	NA	NA	NA	NA	1
REEP1	NA	NA	NA	-0.914112	NA	NA	NA	NA	1
RFK	NA	NA	NA	1.29654	NA	NA	NA	NA	1
RFPL4AL1	NA	NA	NA	0.967594	NA	NA	NA	NA	1
RFPL4B	NA	NA	NA	1.81144	NA	NA	NA	NA	1
RGS7	NA	NA	NA	-1.90836	NA	NA	NA	NA	1
RHD	NA	NA	NA	-0.92905	NA	NA	NA	NA	1
RHOBTB3	NA	NA	NA	0.909337	NA	NA	NA	NA	1
RIIAD1	NA	NA	NA	-1.07759	NA	NA	NA	NA	1
RIMKLA	NA	NA	NA	-1.35365	NA	NA	NA	NA	1
RIMKLB	NA	NA	NA	0.976648	NA	NA	NA	NA	1
RIMS2	NA	NA	NA	-0.9612	NA	NA	NA	NA	1
RIPK1	NA	NA	NA	1.49523	NA	NA	NA	NA	1
RNF152	NA	NA	NA	0.905034	NA	NA	NA	NA	1
RNF43	NA	NA	NA	2.37582	NA	NA	NA	NA	1
RNU5D-1	NA	NA	NA	-1.58594	NA	NA	NA	NA	1
RNVU1-6	NA	NA	NA	-1.47686	NA	NA	NA	NA	1
RORA	NA	NA	NA	1.70423	NA	NA	NA	NA	1
RPL29	NA	NA	NA	-0.996196	NA	NA	NA	NA	1
RSPH3	NA	NA	NA	0.92956	NA	NA	NA	NA	1
RUNX2	NA	NA	NA	1.17546	NA	NA	NA	NA	1
S100A4	NA	NA	NA	1.48366	NA	NA	NA	NA	1
S1PR1	NA	NA	NA	1.25149	NA	NA	NA	NA	1
SAMD8	NA	NA	NA	1.24436	NA	NA	NA	NA	1
SCAMP5	NA	NA	NA	-0.844782	NA	NA	NA	NA	1
SCARA3	NA	NA	NA	1.70184	NA	NA	NA	NA	1
SCN3A	NA	NA	NA	1.38542	NA	NA	NA	NA	1
SCN3B	NA	NA	NA	1.7263	NA	NA	NA	NA	1
SCUBE1	NA	NA	NA	1.77345	NA	NA	NA	NA	1
SCUBE3	NA	NA	NA	1.04577	NA	NA	NA	NA	1
SDHAP3	NA	NA	NA	-1.09447	NA	NA	NA	NA	1
SDHC	NA	NA	NA	-0.94858	NA	NA	NA	NA	1
SEC24B	NA	NA	NA	1.18817	NA	NA	NA	NA	1
SEC61G	NA	NA	NA	-0.983575	NA	NA	NA	NA	1
SELE	NA	NA	NA	1.73688	NA	NA	NA	NA	1
SELENBP1	NA	NA	NA	1.44666	NA	NA	NA	NA	1
SEMA4C	NA	NA	NA	1.08469	NA	NA	NA	NA	1
SERGEF	NA	NA	NA	-1.11786	NA	NA	NA	NA	1
SERPINE2	NA	NA	NA	2.27709	NA	NA	NA	NA	1
SERTAD3	NA	NA	NA	1.13464	NA	NA	NA	NA	1
SFXN4	NA	NA	NA	-1.02293	NA	NA	NA	NA	1
SGIP1	NA	NA	NA	1.17238	NA	NA	NA	NA	1
SGO1-AS1	NA	NA	NA	-1.45213	NA	NA	NA	NA	1
SH3BP5	NA	NA	NA	1.42168	NA	NA	NA	NA	1
SH3D19	NA	NA	NA	1.07077	NA	NA	NA	NA	1
SH3PXD2B	NA	NA	NA	0.925448	NA	NA	NA	NA	1
SHC3	NA	NA	NA	1.57786	NA	NA	NA	NA	1
SHISA9	NA	NA	NA	-1.60327	NA	NA	NA	NA	1
SHROOM3	NA	NA	NA	2.34392	NA	NA	NA	NA	1
SLC16A10	NA	NA	NA	-0.956983	NA	NA	NA	NA	1
SLC16A12	NA	NA	NA	2.1562	NA	NA	NA	NA	1
SLC1A2	NA	NA	NA	-1.23278	NA	NA	NA	NA	1
SLC25A30	NA	NA	NA	0.938229	NA	NA	NA	NA	1
SLC26A4	NA	NA	NA	-1.5325	NA	NA	NA	NA	1
SLC35F4	NA	NA	NA	-1.78611	NA	NA	NA	NA	1
SLC41A2	NA	NA	NA	1.40763	NA	NA	NA	NA	1
SLC44A2	NA	NA	NA	1.58903	NA	NA	NA	NA	1
SLC44A3	NA	NA	NA	-1.00431	NA	NA	NA	NA	1
SLC4A10	NA	NA	NA	3.00558	NA	NA	NA	NA	1
SLC5A12	NA	NA	NA	3.72953	NA	NA	NA	NA	1
SLC6A15	NA	NA	NA	-1.22043	NA	NA	NA	NA	1
SLC6A20	NA	NA	NA	1.20499	NA	NA	NA	NA	1
SLC8A1	NA	NA	NA	-0.954518	NA	NA	NA	NA	1
SLCO1A2	NA	NA	NA	-1.12185	NA	NA	NA	NA	1
SLCO1B3	NA	NA	NA	1.9622	NA	NA	NA	NA	1
SLF2	NA	NA	NA	1.01792	NA	NA	NA	NA	1
SLFN12	NA	NA	NA	1.0572	NA	NA	NA	NA	1
SLIT3	NA	NA	NA	2.25986	NA	NA	NA	NA	1
SLN	NA	NA	NA	3.51758	NA	NA	NA	NA	1
SMIM3	NA	NA	NA	0.973119	NA	NA	NA	NA	1
SMPX	NA	NA	NA	1.62696	NA	NA	NA	NA	1
SMURF2	NA	NA	NA	2.06453	NA	NA	NA	NA	1
SMYD1	NA	NA	NA	1.20881	NA	NA	NA	NA	1
SNHG8	NA	NA	NA	-1.05979	NA	NA	NA	NA	1
SNORA30	NA	NA	NA	-1.24679	NA	NA	NA	NA	1
SNORA3B	NA	NA	NA	-1.06688	NA	NA	NA	NA	1
SNORA70E	NA	NA	NA	-1.34983	NA	NA	NA	NA	1
SNORD14A	NA	NA	NA	-1.1524	NA	NA	NA	NA	1
SNORD72	NA	NA	NA	-1.26311	NA	NA	NA	NA	1
SNORD91B	NA	NA	NA	-1.73318	NA	NA	NA	NA	1
SNORD93	NA	NA	NA	-1.36162	NA	NA	NA	NA	1
SORL1	NA	NA	NA	2.45339	NA	NA	NA	NA	1
SOX5	NA	NA	NA	-1.41409	NA	NA	NA	NA	1
SP110	NA	NA	NA	1.17126	NA	NA	NA	NA	1
SP6	NA	NA	NA	1.54601	NA	NA	NA	NA	1
SPANXB1	NA	NA	NA	2.09947	NA	NA	NA	NA	1
SPARCL1	NA	NA	NA	1.57384	NA	NA	NA	NA	1
SPRY1	NA	NA	NA	3.57077	NA	NA	NA	NA	1
SPRY3	NA	NA	NA	1.29864	NA	NA	NA	NA	1
SPSB4	NA	NA	NA	-1.64287	NA	NA	NA	NA	1
SPTBN1	NA	NA	NA	1.19191	NA	NA	NA	NA	1
SRGAP1	NA	NA	NA	1.96227	NA	NA	NA	NA	1
SRGAP2	NA	NA	NA	1.20496	NA	NA	NA	NA	1
SRSF7	NA	NA	NA	-0.925408	NA	NA	NA	NA	1
SSTR1	NA	NA	NA	1.36681	NA	NA	NA	NA	1
ST6GALNAC3	NA	NA	NA	1.54192	NA	NA	NA	NA	1
ST7	NA	NA	NA	1.84403	NA	NA	NA	NA	1
ST8SIA2	NA	NA	NA	1.1877	NA	NA	NA	NA	1
STAP1	NA	NA	NA	3.20867	NA	NA	NA	NA	1
STC2	NA	NA	NA	1.52791	NA	NA	NA	NA	1
SULT4A1	NA	NA	NA	-1.29205	NA	NA	NA	NA	1
SV2C	NA	NA	NA	-2.67194	NA	NA	NA	NA	1
SVIL	NA	NA	NA	2.40514	NA	NA	NA	NA	1
SYBU	NA	NA	NA	2.12128	NA	NA	NA	NA	1
SYDE1	NA	NA	NA	1.23361	NA	NA	NA	NA	1
SYNPO	NA	NA	NA	1.35617	NA	NA	NA	NA	1
SYNPR	NA	NA	NA	2.62999	NA	NA	NA	NA	1
SYT9	NA	NA	NA	1.47757	NA	NA	NA	NA	1
TACC2	NA	NA	NA	0.964593	NA	NA	NA	NA	1
TCAF1	NA	NA	NA	0.972488	NA	NA	NA	NA	1
TCEAL7	NA	NA	NA	1.05324	NA	NA	NA	NA	1
TCF7L1	NA	NA	NA	1.39246	NA	NA	NA	NA	1
TCHH	NA	NA	NA	1.66047	NA	NA	NA	NA	1
TCTE3	NA	NA	NA	-1.01033	NA	NA	NA	NA	1
TCTN2	NA	NA	NA	1.50436	NA	NA	NA	NA	1
TEAD1	NA	NA	NA	1.03618	NA	NA	NA	NA	1
TEAD2	NA	NA	NA	1.15148	NA	NA	NA	NA	1
TENM2	NA	NA	NA	-0.990108	NA	NA	NA	NA	1
TES	NA	NA	NA	4.53974	NA	NA	NA	NA	1
TFE3	NA	NA	NA	1.10717	NA	NA	NA	NA	1
TFPI2	NA	NA	NA	3.18098	NA	NA	NA	NA	1
TGFBR3	NA	NA	NA	1.58291	NA	NA	NA	NA	1
TGOLN2	NA	NA	NA	0.927487	NA	NA	NA	NA	1
THBS3	NA	NA	NA	-1.26791	NA	NA	NA	NA	1
THSD7B	NA	NA	NA	-1.80458	NA	NA	NA	NA	1
TIMP2	NA	NA	NA	1.18697	NA	NA	NA	NA	1
TLL1	NA	NA	NA	2.0825	NA	NA	NA	NA	1
TLR4	NA	NA	NA	2.07346	NA	NA	NA	NA	1
TM4SF18	NA	NA	NA	4.56792	NA	NA	NA	NA	1
TMEM131L	NA	NA	NA	1.75787	NA	NA	NA	NA	1
TMEM176B	NA	NA	NA	1.30566	NA	NA	NA	NA	1
TMEM52B	NA	NA	NA	1.27719	NA	NA	NA	NA	1
TMEM97	NA	NA	NA	-0.892105	NA	NA	NA	NA	1
TNFRSF10D	NA	NA	NA	3.60197	NA	NA	NA	NA	1
TNFRSF21	NA	NA	NA	1.57181	NA	NA	NA	NA	1
TNFRSF9	NA	NA	NA	1.94811	NA	NA	NA	NA	1
TNNI3	NA	NA	NA	1.3882	NA	NA	NA	NA	1
TNNT1	NA	NA	NA	2.09231	NA	NA	NA	NA	1
TNS1	NA	NA	NA	1.1955	NA	NA	NA	NA	1
TP63	NA	NA	NA	3.16736	NA	NA	NA	NA	1
TPH1	NA	NA	NA	-1.23158	NA	NA	NA	NA	1
TPK1	NA	NA	NA	2.0279	NA	NA	NA	NA	1
TPM4	NA	NA	NA	1.43123	NA	NA	NA	NA	1
TPTEP1	NA	NA	NA	0.954414	NA	NA	NA	NA	1
TRAV12-2	NA	NA	NA	1.46948	NA	NA	NA	NA	1
TRERF1	NA	NA	NA	1.01004	NA	NA	NA	NA	1
TRIL	NA	NA	NA	2.60561	NA	NA	NA	NA	1
TRIM5	NA	NA	NA	1.37764	NA	NA	NA	NA	1
TRIM51EP	NA	NA	NA	1.20636	NA	NA	NA	NA	1
TRIM53AP	NA	NA	NA	1.534	NA	NA	NA	NA	1
TRIM71	NA	NA	NA	2.96397	NA	NA	NA	NA	1
TRPC4	NA	NA	NA	2.03916	NA	NA	NA	NA	1
TTC30A	NA	NA	NA	2.12096	NA	NA	NA	NA	1
TTC30B	NA	NA	NA	1.52493	NA	NA	NA	NA	1
TUBG2	NA	NA	NA	1.10059	NA	NA	NA	NA	1
TUFT1	NA	NA	NA	0.830251	NA	NA	NA	NA	1
UBALD2	NA	NA	NA	1.02188	NA	NA	NA	NA	1
UBTFL1	NA	NA	NA	-3.17347	NA	NA	NA	NA	1
UCA1	NA	NA	NA	4.07734	NA	NA	NA	NA	1
UNC13D	NA	NA	NA	0.969623	NA	NA	NA	NA	1
UNC5C	NA	NA	NA	1.38715	NA	NA	NA	NA	1
UNC5D	NA	NA	NA	1.6294	NA	NA	NA	NA	1
USH2A	NA	NA	NA	-1.94497	NA	NA	NA	NA	1
USP46	NA	NA	NA	2.08882	NA	NA	NA	NA	1
USP49	NA	NA	NA	-1.05634	NA	NA	NA	NA	1
UTRN	NA	NA	NA	1.30199	NA	NA	NA	NA	1
UTS2	NA	NA	NA	1.73327	NA	NA	NA	NA	1
VIM	NA	NA	NA	4.58218	NA	NA	NA	NA	1
VWC2L-IT1	NA	NA	NA	-1.99838	NA	NA	NA	NA	1
WBP1L	NA	NA	NA	1.23917	NA	NA	NA	NA	1
WIPF3	NA	NA	NA	2.18655	NA	NA	NA	NA	1
YAP1	NA	NA	NA	1.72269	NA	NA	NA	NA	1
YPEL5	NA	NA	NA	1.08131	NA	NA	NA	NA	1
ZADH2	NA	NA	NA	1.6015	NA	NA	NA	NA	1
ZBBX	NA	NA	NA	-1.74462	NA	NA	NA	NA	1
ZBTB8A	NA	NA	NA	0.923706	NA	NA	NA	NA	1
ZFPM2-AS1	NA	NA	NA	0.856767	NA	NA	NA	NA	1
ZNF185	NA	NA	NA	1.21475	NA	NA	NA	NA	1
ZNF217	NA	NA	NA	0.829536	NA	NA	NA	NA	1
ZNF280A	NA	NA	NA	2.0995	NA	NA	NA	NA	1
ZNF385A	NA	NA	NA	1.30157	NA	NA	NA	NA	1
ZNF703	NA	NA	NA	1.38401	NA	NA	NA	NA	1
ZNF780B	NA	NA	NA	-1.08648	NA	NA	NA	NA	1
ZNF829	NA	NA	NA	-0.864852	NA	NA	NA	NA	1
ZSWIM4	NA	NA	NA	1.13306	NA	NA	NA	NA	1
ZSWIM5	NA	NA	NA	-1.15572	NA	NA	NA	NA	1
LOC105377123	NA	NA	NA	NA	NA	-1.3672	NA	NA	1
SUGT1P1	NA	NA	NA	NA	NA	1.26371	NA	NA	1
ABCC4	NA	NA	NA	NA	NA	NA	1.23827	NA	1
ABLIM2	NA	NA	NA	NA	NA	NA	-0.978262	NA	1
ADAM12	NA	NA	NA	NA	NA	NA	1.22898	NA	1
ADAMTS18	NA	NA	NA	NA	NA	NA	-0.934281	NA	1
ADCYAP1	NA	NA	NA	NA	NA	NA	1.28988	NA	1
ADPRHL1	NA	NA	NA	NA	NA	NA	-1.40203	NA	1
AJAP1	NA	NA	NA	NA	NA	NA	1.8673	NA	1
AKR7A3	NA	NA	NA	NA	NA	NA	-1.08668	NA	1
AKT1	NA	NA	NA	NA	NA	NA	-1.14803	NA	1
ANKRD36B	NA	NA	NA	NA	NA	NA	0.95999	NA	1
ANO8	NA	NA	NA	NA	NA	NA	-1.00143	NA	1
ARC	NA	NA	NA	NA	NA	NA	1.52655	NA	1
ARL4A	NA	NA	NA	NA	NA	NA	0.913887	NA	1
ASAP2	NA	NA	NA	NA	NA	NA	1.12545	NA	1
ASRGL1	NA	NA	NA	NA	NA	NA	-0.775703	NA	1
ASTN2	NA	NA	NA	NA	NA	NA	0.917585	NA	1
ATP11C	NA	NA	NA	NA	NA	NA	1.03662	NA	1
ATP2B3	NA	NA	NA	NA	NA	NA	-1.37401	NA	1
BACE1	NA	NA	NA	NA	NA	NA	-0.774781	NA	1
BAHCC1	NA	NA	NA	NA	NA	NA	-0.799257	NA	1
BBS12	NA	NA	NA	NA	NA	NA	1.84474	NA	1
BCAS3	NA	NA	NA	NA	NA	NA	-0.725122	NA	1
BCL7C	NA	NA	NA	NA	NA	NA	0.800629	NA	1
BMF	NA	NA	NA	NA	NA	NA	-1.59849	NA	1
C19orf70	NA	NA	NA	NA	NA	NA	0.839699	NA	1
C2orf50	NA	NA	NA	NA	NA	NA	0.861038	NA	1
CA14	NA	NA	NA	NA	NA	NA	-1.20594	NA	1
CACNA1B	NA	NA	NA	NA	NA	NA	-0.738159	NA	1
CACNB4	NA	NA	NA	NA	NA	NA	0.903935	NA	1
CASTOR2	NA	NA	NA	NA	NA	NA	-1.06048	NA	1
CCDC28B	NA	NA	NA	NA	NA	NA	-0.953387	NA	1
CD3EAP	NA	NA	NA	NA	NA	NA	0.947699	NA	1
CDKL2	NA	NA	NA	NA	NA	NA	-1.12343	NA	1
CELF3	NA	NA	NA	NA	NA	NA	-0.946645	NA	1
CELSR2	NA	NA	NA	NA	NA	NA	-0.774734	NA	1
CEP68	NA	NA	NA	NA	NA	NA	-0.848975	NA	1
CHAC2	NA	NA	NA	NA	NA	NA	0.742314	NA	1
CHRD	NA	NA	NA	NA	NA	NA	1.02744	NA	1
CKB	NA	NA	NA	NA	NA	NA	-1.163	NA	1
CLIP3	NA	NA	NA	NA	NA	NA	-1.05977	NA	1
CLN3	NA	NA	NA	NA	NA	NA	-1.14184	NA	1
CLSTN2	NA	NA	NA	NA	NA	NA	1.00138	NA	1
CLVS2	NA	NA	NA	NA	NA	NA	-1.06611	NA	1
CMAHP	NA	NA	NA	NA	NA	NA	-1.16028	NA	1
COL6A3	NA	NA	NA	NA	NA	NA	1.79924	NA	1
CORO1A	NA	NA	NA	NA	NA	NA	1.1125	NA	1
CPPED1	NA	NA	NA	NA	NA	NA	-0.917268	NA	1
CRISPLD2	NA	NA	NA	NA	NA	NA	-1.07765	NA	1
CTSH	NA	NA	NA	NA	NA	NA	1.10039	NA	1
CYYR1	NA	NA	NA	NA	NA	NA	-1.68311	NA	1
DEPTOR	NA	NA	NA	NA	NA	NA	-0.780188	NA	1
DLG4	NA	NA	NA	NA	NA	NA	1.5195	NA	1
DLL4	NA	NA	NA	NA	NA	NA	-0.764689	NA	1
DPP6	NA	NA	NA	NA	NA	NA	-0.909261	NA	1
DPYSL2	NA	NA	NA	NA	NA	NA	-0.843129	NA	1
DUSP2	NA	NA	NA	NA	NA	NA	1.19252	NA	1
DUSP26	NA	NA	NA	NA	NA	NA	-1.16337	NA	1
DYNLT3	NA	NA	NA	NA	NA	NA	1.43138	NA	1
DYRK1B	NA	NA	NA	NA	NA	NA	-1.13766	NA	1
ECSCR	NA	NA	NA	NA	NA	NA	1.06929	NA	1
EGR3	NA	NA	NA	NA	NA	NA	1.05615	NA	1
EGR4	NA	NA	NA	NA	NA	NA	1.47344	NA	1
EMD	NA	NA	NA	NA	NA	NA	-0.726628	NA	1
EML3	NA	NA	NA	NA	NA	NA	0.914908	NA	1
ENO4	NA	NA	NA	NA	NA	NA	-0.821981	NA	1
EXOSC4	NA	NA	NA	NA	NA	NA	-0.812953	NA	1
F2RL3	NA	NA	NA	NA	NA	NA	1.89265	NA	1
FAM135B	NA	NA	NA	NA	NA	NA	1.12449	NA	1
FAM89B	NA	NA	NA	NA	NA	NA	-1.04347	NA	1
FAXC	NA	NA	NA	NA	NA	NA	-0.926699	NA	1
FBXL21	NA	NA	NA	NA	NA	NA	1.10769	NA	1
FECH	NA	NA	NA	NA	NA	NA	-0.974935	NA	1
FKBP7	NA	NA	NA	NA	NA	NA	-1.48867	NA	1
FLJ33534	NA	NA	NA	NA	NA	NA	0.992338	NA	1
FOS	NA	NA	NA	NA	NA	NA	1.40531	NA	1
FRAT1	NA	NA	NA	NA	NA	NA	-1.19706	NA	1
FUOM	NA	NA	NA	NA	NA	NA	1.53682	NA	1
GAA	NA	NA	NA	NA	NA	NA	-0.77818	NA	1
GALE	NA	NA	NA	NA	NA	NA	1.18741	NA	1
GATS	NA	NA	NA	NA	NA	NA	-1.4331	NA	1
GCDH	NA	NA	NA	NA	NA	NA	-1.11892	NA	1
GDPD5	NA	NA	NA	NA	NA	NA	0.770931	NA	1
GFPT1	NA	NA	NA	NA	NA	NA	0.773733	NA	1
GJB2	NA	NA	NA	NA	NA	NA	0.890642	NA	1
GPCPD1	NA	NA	NA	NA	NA	NA	1.04512	NA	1
GPR12	NA	NA	NA	NA	NA	NA	0.891245	NA	1
GPR173	NA	NA	NA	NA	NA	NA	-1.00806	NA	1
GREB1	NA	NA	NA	NA	NA	NA	-1.07396	NA	1
GRM4	NA	NA	NA	NA	NA	NA	1.12335	NA	1
HBP1	NA	NA	NA	NA	NA	NA	-1.18701	NA	1
HCST	NA	NA	NA	NA	NA	NA	2.03429	NA	1
HDAC9	NA	NA	NA	NA	NA	NA	-0.947567	NA	1
HDC	NA	NA	NA	NA	NA	NA	-0.885242	NA	1
HIC1	NA	NA	NA	NA	NA	NA	1.66457	NA	1
HIST1H3A	NA	NA	NA	NA	NA	NA	-0.967004	NA	1
HIST2H2BE	NA	NA	NA	NA	NA	NA	-1.12514	NA	1
HIST2H2BF	NA	NA	NA	NA	NA	NA	-1.13919	NA	1
HLA-H	NA	NA	NA	NA	NA	NA	1.24873	NA	1
HOMER1	NA	NA	NA	NA	NA	NA	1.08133	NA	1
HOXD10	NA	NA	NA	NA	NA	NA	-1.14027	NA	1
HSP90AB3P	NA	NA	NA	NA	NA	NA	0.804671	NA	1
HTR5A	NA	NA	NA	NA	NA	NA	1.71338	NA	1
ILDR2	NA	NA	NA	NA	NA	NA	-0.967674	NA	1
INPP5F	NA	NA	NA	NA	NA	NA	0.991341	NA	1
IPO5P1	NA	NA	NA	NA	NA	NA	-0.857629	NA	1
IRX3	NA	NA	NA	NA	NA	NA	1.18583	NA	1
ITPRIPL2	NA	NA	NA	NA	NA	NA	0.771731	NA	1
JAM3	NA	NA	NA	NA	NA	NA	-0.954004	NA	1
JPT1	NA	NA	NA	NA	NA	NA	-1.04007	NA	1
KAT2B	NA	NA	NA	NA	NA	NA	0.868181	NA	1
KCNK3	NA	NA	NA	NA	NA	NA	-1.00306	NA	1
KIAA1211L	NA	NA	NA	NA	NA	NA	-0.86361	NA	1
KIF3C	NA	NA	NA	NA	NA	NA	-0.886853	NA	1
KIRREL3	NA	NA	NA	NA	NA	NA	-0.987445	NA	1
KIZ	NA	NA	NA	NA	NA	NA	-0.778593	NA	1
KRT7-AS	NA	NA	NA	NA	NA	NA	1.30815	NA	1
KRT8	NA	NA	NA	NA	NA	NA	0.826075	NA	1
LDB1	NA	NA	NA	NA	NA	NA	-0.904452	NA	1
LDLRAD3	NA	NA	NA	NA	NA	NA	-0.716566	NA	1
LINC01461	NA	NA	NA	NA	NA	NA	0.903635	NA	1
LINC02036	NA	NA	NA	NA	NA	NA	0.916293	NA	1
LINC02073	NA	NA	NA	NA	NA	NA	1.70181	NA	1
LINC02197	NA	NA	NA	NA	NA	NA	-1.11922	NA	1
LINC02334	NA	NA	NA	NA	NA	NA	0.934159	NA	1
LINCR-0001	NA	NA	NA	NA	NA	NA	1.55866	NA	1
LOC100128288	NA	NA	NA	NA	NA	NA	-1.00525	NA	1
LOC100130899	NA	NA	NA	NA	NA	NA	-0.800044	NA	1
LOC100506474	NA	NA	NA	NA	NA	NA	0.786547	NA	1
LOC101927468	NA	NA	NA	NA	NA	NA	-0.972685	NA	1
LOC101927786	NA	NA	NA	NA	NA	NA	1.14388	NA	1
LOC101929705	NA	NA	NA	NA	NA	NA	1.17307	NA	1
LOC101930112	NA	NA	NA	NA	NA	NA	-0.996794	NA	1
LOC105372330	NA	NA	NA	NA	NA	NA	-0.898271	NA	1
LOC105374013	NA	NA	NA	NA	NA	NA	-1.05278	NA	1
LOC105375361	NA	NA	NA	NA	NA	NA	0.963886	NA	1
LOC105378516	NA	NA	NA	NA	NA	NA	-0.763525	NA	1
LOC105378712	NA	NA	NA	NA	NA	NA	-0.953817	NA	1
LOC105378798	NA	NA	NA	NA	NA	NA	-0.96832	NA	1
LOC105379383	NA	NA	NA	NA	NA	NA	2.25779	NA	1
LOC729296	NA	NA	NA	NA	NA	NA	-1.13388	NA	1
LOC730101	NA	NA	NA	NA	NA	NA	0.951847	NA	1
LONRF1	NA	NA	NA	NA	NA	NA	0.785755	NA	1
LRFN2	NA	NA	NA	NA	NA	NA	1.34692	NA	1
LRIG3	NA	NA	NA	NA	NA	NA	-0.887059	NA	1
LRP1	NA	NA	NA	NA	NA	NA	-0.95172	NA	1
LYSMD2	NA	NA	NA	NA	NA	NA	0.939841	NA	1
LYSMD3	NA	NA	NA	NA	NA	NA	1.41816	NA	1
MACROD2	NA	NA	NA	NA	NA	NA	0.973407	NA	1
MAK16	NA	NA	NA	NA	NA	NA	1.08057	NA	1
MAP2K6	NA	NA	NA	NA	NA	NA	-1.77086	NA	1
MAP3K14	NA	NA	NA	NA	NA	NA	1.18358	NA	1
2001-03-01	NA	NA	NA	NA	NA	NA	-0.815666	NA	1
MEAT6	NA	NA	NA	NA	NA	NA	-1.59713	NA	1
MED12L	NA	NA	NA	NA	NA	NA	1.08773	NA	1
METTL7A	NA	NA	NA	NA	NA	NA	-1.5683	NA	1
MFSD11	NA	NA	NA	NA	NA	NA	-0.740267	NA	1
MIR127	NA	NA	NA	NA	NA	NA	1.25019	NA	1
MIR1305	NA	NA	NA	NA	NA	NA	-1.76752	NA	1
MIR136	NA	NA	NA	NA	NA	NA	1.52929	NA	1
MIR216B	NA	NA	NA	NA	NA	NA	-0.900378	NA	1
MIR31	NA	NA	NA	NA	NA	NA	0.964317	NA	1
MIR431	NA	NA	NA	NA	NA	NA	0.902352	NA	1
MIR4521	NA	NA	NA	NA	NA	NA	1.21744	NA	1
MIR4660	NA	NA	NA	NA	NA	NA	-0.975087	NA	1
MIR548A1	NA	NA	NA	NA	NA	NA	0.940685	NA	1
MIR597	NA	NA	NA	NA	NA	NA	-0.909008	NA	1
MPZ	NA	NA	NA	NA	NA	NA	0.850834	NA	1
MPZL3	NA	NA	NA	NA	NA	NA	1.00659	NA	1
MRPS28	NA	NA	NA	NA	NA	NA	0.872256	NA	1
MSRA	NA	NA	NA	NA	NA	NA	1.28326	NA	1
MVP	NA	NA	NA	NA	NA	NA	-0.93441	NA	1
MXD3	NA	NA	NA	NA	NA	NA	-1.04568	NA	1
N4BP2L2-IT2	NA	NA	NA	NA	NA	NA	-1.15836	NA	1
NBN	NA	NA	NA	NA	NA	NA	1.18643	NA	1
NCK1-AS1	NA	NA	NA	NA	NA	NA	-0.732126	NA	1
NDUFAF6	NA	NA	NA	NA	NA	NA	-0.909713	NA	1
NEK3	NA	NA	NA	NA	NA	NA	0.739172	NA	1
NHSL1	NA	NA	NA	NA	NA	NA	-0.748908	NA	1
NINL	NA	NA	NA	NA	NA	NA	-1.08235	NA	1
NKX6-1	NA	NA	NA	NA	NA	NA	-0.83241	NA	1
NPPA	NA	NA	NA	NA	NA	NA	1.37141	NA	1
NR1D2	NA	NA	NA	NA	NA	NA	-0.878389	NA	1
NRGN	NA	NA	NA	NA	NA	NA	0.856342	NA	1
NRN1	NA	NA	NA	NA	NA	NA	1.56442	NA	1
NUDT9P1	NA	NA	NA	NA	NA	NA	-0.949259	NA	1
OR56A3	NA	NA	NA	NA	NA	NA	0.798332	NA	1
OSBP2	NA	NA	NA	NA	NA	NA	1.34875	NA	1
OSBPL10	NA	NA	NA	NA	NA	NA	1.28131	NA	1
PAEP	NA	NA	NA	NA	NA	NA	1.59366	NA	1
PALD1	NA	NA	NA	NA	NA	NA	0.827023	NA	1
PCDHB1	NA	NA	NA	NA	NA	NA	-0.875731	NA	1
PDE1C	NA	NA	NA	NA	NA	NA	1.04082	NA	1
PDIA6	NA	NA	NA	NA	NA	NA	0.715163	NA	1
PGM3	NA	NA	NA	NA	NA	NA	0.798338	NA	1
PHF2	NA	NA	NA	NA	NA	NA	0.869098	NA	1
PHF8	NA	NA	NA	NA	NA	NA	-0.726259	NA	1
PIM1	NA	NA	NA	NA	NA	NA	-1.04695	NA	1
PLCH1	NA	NA	NA	NA	NA	NA	-0.79374	NA	1
PLEKHG1	NA	NA	NA	NA	NA	NA	-1.74232	NA	1
PLEKHJ1	NA	NA	NA	NA	NA	NA	-0.79086	NA	1
PLN	NA	NA	NA	NA	NA	NA	1.99448	NA	1
PM20D2	NA	NA	NA	NA	NA	NA	-0.757354	NA	1
PMPCA	NA	NA	NA	NA	NA	NA	0.871161	NA	1
PNMA3	NA	NA	NA	NA	NA	NA	0.779557	NA	1
PPM1H	NA	NA	NA	NA	NA	NA	-0.878085	NA	1
PRDX4	NA	NA	NA	NA	NA	NA	0.773584	NA	1
PTPRN	NA	NA	NA	NA	NA	NA	1.20473	NA	1
QARS	NA	NA	NA	NA	NA	NA	-1.00476	NA	1
RALGDS	NA	NA	NA	NA	NA	NA	-0.857008	NA	1
RANBP2	NA	NA	NA	NA	NA	NA	1.14927	NA	1
RAP2A	NA	NA	NA	NA	NA	NA	0.912012	NA	1
RASL11A	NA	NA	NA	NA	NA	NA	1.74752	NA	1
RASL11B	NA	NA	NA	NA	NA	NA	-1.29	NA	1
RCOR2	NA	NA	NA	NA	NA	NA	-0.975924	NA	1
REL	NA	NA	NA	NA	NA	NA	0.933939	NA	1
RGPD4	NA	NA	NA	NA	NA	NA	1.03653	NA	1
RNF182	NA	NA	NA	NA	NA	NA	-0.857177	NA	1
RNPC3	NA	NA	NA	NA	NA	NA	-0.819047	NA	1
ROBO1	NA	NA	NA	NA	NA	NA	-0.874192	NA	1
ROCK2	NA	NA	NA	NA	NA	NA	0.861892	NA	1
RPGR	NA	NA	NA	NA	NA	NA	1.0963	NA	1
RTL1	NA	NA	NA	NA	NA	NA	1.60499	NA	1
S100A14	NA	NA	NA	NA	NA	NA	0.95166	NA	1
SCGB2A1	NA	NA	NA	NA	NA	NA	-1.02575	NA	1
SELENOW	NA	NA	NA	NA	NA	NA	0.91192	NA	1
SERPINB5	NA	NA	NA	NA	NA	NA	1.37412	NA	1
SETBP1	NA	NA	NA	NA	NA	NA	-0.935836	NA	1
SH3BP4	NA	NA	NA	NA	NA	NA	-0.973965	NA	1
SH3PXD2A	NA	NA	NA	NA	NA	NA	-0.96889	NA	1
SIPA1L3	NA	NA	NA	NA	NA	NA	0.801767	NA	1
SKIL	NA	NA	NA	NA	NA	NA	0.836146	NA	1
SLC17A6	NA	NA	NA	NA	NA	NA	1.5357	NA	1
SLC9A7P1	NA	NA	NA	NA	NA	NA	0.959826	NA	1
SMAD9	NA	NA	NA	NA	NA	NA	-1.12376	NA	1
SMYD5	NA	NA	NA	NA	NA	NA	0.87922	NA	1
SNHG3	NA	NA	NA	NA	NA	NA	0.736682	NA	1
SNN	NA	NA	NA	NA	NA	NA	-1.09319	NA	1
SOBP	NA	NA	NA	NA	NA	NA	1.26769	NA	1
SORD	NA	NA	NA	NA	NA	NA	-0.982344	NA	1
SORT1	NA	NA	NA	NA	NA	NA	-0.82105	NA	1
SOX6	NA	NA	NA	NA	NA	NA	-0.940631	NA	1
SP8	NA	NA	NA	NA	NA	NA	-1.69094	NA	1
SPCS3	NA	NA	NA	NA	NA	NA	0.990753	NA	1
SSR3	NA	NA	NA	NA	NA	NA	0.766857	NA	1
SST	NA	NA	NA	NA	NA	NA	1.7617	NA	1
ST8SIA5	NA	NA	NA	NA	NA	NA	-1.56207	NA	1
STXBP5	NA	NA	NA	NA	NA	NA	1.20205	NA	1
SYNJ2-IT1	NA	NA	NA	NA	NA	NA	0.925424	NA	1
SYT4	NA	NA	NA	NA	NA	NA	1.06793	NA	1
TBC1D16	NA	NA	NA	NA	NA	NA	-0.78093	NA	1
TBC1D24	NA	NA	NA	NA	NA	NA	-0.888554	NA	1
TBX10	NA	NA	NA	NA	NA	NA	1.01573	NA	1
TCF4	NA	NA	NA	NA	NA	NA	-0.794631	NA	1
TENM4	NA	NA	NA	NA	NA	NA	-0.762145	NA	1
TET1	NA	NA	NA	NA	NA	NA	-1.04522	NA	1
TFAP2A	NA	NA	NA	NA	NA	NA	-0.816135	NA	1
TMC6	NA	NA	NA	NA	NA	NA	0.974302	NA	1
TMEM132A	NA	NA	NA	NA	NA	NA	-1.43642	NA	1
TMEM163	NA	NA	NA	NA	NA	NA	-1.01377	NA	1
TMEM19	NA	NA	NA	NA	NA	NA	-0.98836	NA	1
TMEM35A	NA	NA	NA	NA	NA	NA	-1.96025	NA	1
TNK2	NA	NA	NA	NA	NA	NA	-1.04807	NA	1
TNR	NA	NA	NA	NA	NA	NA	1.04557	NA	1
TOX3	NA	NA	NA	NA	NA	NA	-1.43847	NA	1
TRAF5	NA	NA	NA	NA	NA	NA	0.912725	NA	1
TRIB2	NA	NA	NA	NA	NA	NA	0.997888	NA	1
TRMT6	NA	NA	NA	NA	NA	NA	0.847238	NA	1
TSHZ1	NA	NA	NA	NA	NA	NA	1.00185	NA	1
TSPEAR	NA	NA	NA	NA	NA	NA	-1.31291	NA	1
TSPYL2	NA	NA	NA	NA	NA	NA	0.69983	NA	1
TSR3	NA	NA	NA	NA	NA	NA	-0.837683	NA	1
TUBB2A	NA	NA	NA	NA	NA	NA	1.1982	NA	1
TUSC3	NA	NA	NA	NA	NA	NA	0.712977	NA	1
UAP1	NA	NA	NA	NA	NA	NA	0.746213	NA	1
UBE2QL1	NA	NA	NA	NA	NA	NA	-1.08861	NA	1
USP18	NA	NA	NA	NA	NA	NA	-0.800806	NA	1
USP27X	NA	NA	NA	NA	NA	NA	1.00161	NA	1
USP6NL	NA	NA	NA	NA	NA	NA	1.00989	NA	1
VANGL2	NA	NA	NA	NA	NA	NA	-0.762681	NA	1
VASH2	NA	NA	NA	NA	NA	NA	-0.882051	NA	1
WASHC3	NA	NA	NA	NA	NA	NA	-0.902509	NA	1
XDH	NA	NA	NA	NA	NA	NA	1.09632	NA	1
YIF1B	NA	NA	NA	NA	NA	NA	1.05042	NA	1
ZBTB20	NA	NA	NA	NA	NA	NA	1.262	NA	1
ZIC2	NA	NA	NA	NA	NA	NA	-1.04606	NA	1
ZMYM3	NA	NA	NA	NA	NA	NA	-0.760637	NA	1
ZNF254	NA	NA	NA	NA	NA	NA	-1.04086	NA	1
ZNF423	NA	NA	NA	NA	NA	NA	-1.30471	NA	1
ZNF439	NA	NA	NA	NA	NA	NA	-1.08066	NA	1
ITGA2	NA	NA	NA	NA	2.02114	2.89551	5.23338	7.36169	4
TM4SF1	NA	NA	NA	3.77496	2.22691	2.6003	3.34302	7.36029	5
SCEL	NA	NA	NA	1.12334	NA	NA	3.87615	6.83453	3
CXCL14	NA	NA	NA	NA	4.47707	5.67973	3.39887	6.30311	4
CXCL8	NA	NA	NA	4.52429	2.99327	2.80776	4.72948	5.83412	5
MET	NA	NA	NA	2.66157	2.51451	NA	4.04523	5.60589	4
CALCRL	NA	NA	NA	NA	2.58581	2.57219	3.37337	5.2094	4
CCL2	NA	NA	NA	NA	NA	1.80863	NA	5.06578	2
EMP1	NA	NA	NA	4.5829	NA	NA	3.48146	4.96213	3
THBS1	NA	NA	NA	NA	NA	2.02213	NA	4.91509	2
FLRT3	NA	NA	NA	NA	1.99406	NA	3.65573	4.88287	3
DUSP6	NA	NA	2.21105	4.16555	NA	2.57791	4.46451	4.85685	5
SAT1	NA	NA	NA	1.5238	3.00827	3.49908	4.61503	4.78751	5
TNC	NA	4.28882	3.59891	5.01627	NA	3.06689	NA	4.76267	5
IGFL1	NA	NA	NA	NA	6.9768	4.84213	8.05095	4.6174	4
SERPINB7	NA	NA	NA	NA	NA	NA	NA	4.53157	1
CD44	NA	NA	NA	2.68315	NA	1.55542	1.59415	4.47926	4
LAMC2	NA	NA	NA	NA	2.11418	1.91161	4.02019	4.45532	4
ANXA1	NA	3.17674	1.97715	7.44861	NA	NA	NA	4.43242	4
VSIG1	NA	NA	NA	1.83864	NA	NA	1.75844	4.3755	3
STC1	NA	NA	1.98238	1.82299	NA	NA	4.35481	4.34991	4
RGCC	NA	NA	NA	NA	2.06772	NA	2.54643	4.32953	3
ESM1	NA	NA	NA	NA	NA	NA	NA	4.3133	1
ARHGAP42	NA	NA	NA	1.98151	1.7336	2.50316	2.21149	4.30953	5
CEMIP	NA	NA	NA	NA	NA	2.08459	2.31573	4.28889	3
GNG12	NA	NA	NA	NA	2.18216	1.75239	3.22871	4.18351	4
LURAP1L	NA	NA	NA	NA	NA	1.83388	NA	4.08891	2
SERPINE1	NA	NA	NA	4.10599	NA	NA	3.97255	4.07942	3
HTR3A	NA	NA	NA	NA	2.28624	1.79102	2.34798	3.9787	4
NPPC	NA	NA	NA	NA	NA	0.90596	1.91552	3.9555	3
ICAM1	NA	NA	NA	2.16358	1.17441	1.93678	1.97918	3.91915	5
CALB1	NA	NA	NA	-1.19777	4.55843	3.67251	6.06015	3.908	5
NT5E	NA	NA	NA	1.55124	NA	NA	NA	3.82028	2
TNIK	NA	NA	1.25933	1.87735	2.28721	2.62318	2.58874	3.81926	6
EGR1	NA	2.34281	4.2712	3.01706	3.94344	2.97212	6.15868	3.81755	7
TMEM133	NA	NA	1.07396	1.65885	NA	1.75977	NA	3.79705	4
WLS	NA	NA	NA	NA	2.63842	2.51931	3.06916	3.79635	4
IER3	NA	NA	4.08402	4.44799	1.85068	1.63893	3.60134	3.75413	6
CA10	NA	NA	NA	3.78498	NA	NA	NA	3.70577	2
SLPI	NA	NA	NA	NA	NA	NA	NA	3.70173	1
TMC5	NA	NA	NA	NA	NA	1.70656	2.03512	3.68902	3
DSG2	NA	NA	NA	NA	NA	NA	NA	3.66586	1
PTHLH	NA	NA	NA	2.05457	NA	NA	NA	3.66514	2
IGF2BP2	NA	NA	NA	NA	NA	NA	2.34818	3.64393	2
NECAB1	NA	NA	NA	2.11172	2.1182	2.50604	3.64332	3.64311	5
PLAUR	NA	NA	NA	2.20959	NA	NA	NA	3.60184	2
DIRAS3	NA	NA	NA	NA	2.97505	NA	3.53711	3.57764	3
NEFL	NA	NA	NA	-1.71183	1.83477	3.18329	2.45438	3.5645	5
EPAS1	NA	NA	NA	NA	2.73685	2.6573	4.07223	3.52696	4
HES1	NA	NA	NA	1.39072	2.05453	2.94812	3.97457	3.50397	5
GRPR	NA	NA	NA	1.2835	NA	NA	1.64982	3.48252	3
SPRY4	NA	2.5341	3.59514	5.08652	2.36741	2.4382	4.27496	3.4801	7
SEMA3A	NA	NA	NA	1.59465	2.51244	2.05325	2.89122	3.45677	5
DSEL	NA	NA	NA	NA	NA	1.23143	2.20488	3.44065	3
FOSL1	NA	NA	NA	2.64637	NA	NA	2.84887	3.43249	3
SPRY2	NA	1.58386	2.30228	4.59535	2.57507	1.97428	4.29018	3.35941	7
CD68	NA	NA	2.15033	2.98567	NA	NA	1.4547	3.35842	4
PARP14	NA	NA	NA	NA	NA	1.9723	NA	3.33759	2
WIPI1	NA	NA	NA	2.28858	NA	2.0064	1.6357	3.32994	4
EGFR	8.33853	8.1747	NA	NA	7.60226	7.87994	1.98854	3.31471	6
LOX	NA	NA	NA	NA	NA	NA	NA	3.29111	1
ID3	NA	NA	NA	2.15971	NA	1.83834	2.20505	3.28786	4
CTSS	NA	NA	NA	1.21166	NA	1.43335	NA	3.28513	3
ANKRD1	NA	NA	NA	5.28338	NA	NA	NA	3.26961	2
ELL2	NA	NA	3.33596	4.83054	NA	NA	2.61488	3.24755	4
ANXA2P2	NA	NA	NA	1.18816	2.52211	2.01222	2.7399	3.20802	5
ZFP36	NA	NA	NA	2.20938	NA	1.44979	2.413	3.17808	4
DPYD	NA	NA	NA	1.48959	NA	NA	1.4935	3.17262	3
RAB31	NA	NA	1.09119	3.78813	NA	NA	NA	3.14517	3
TACR1	NA	NA	NA	NA	NA	NA	NA	3.13742	1
LINC00342	NA	NA	NA	NA	NA	NA	NA	3.12779	1
IFITM2	NA	NA	1.08962	2.9204	1.7063	NA	2.41097	3.10567	5
EDN1	NA	NA	NA	NA	NA	NA	1.41437	3.09154	2
GDF15	NA	NA	NA	2.55962	1.25415	2.59319	3.88905	3.07852	5
ETV5	NA	NA	NA	2.41544	1.92017	2.22181	2.07027	3.07847	5
DOCK10	NA	NA	NA	NA	NA	NA	2.41886	3.05318	2
ITGA3	NA	NA	3.54638	3.60709	1.4969	NA	2.69781	3.0386	5
PHLDA1	NA	NA	NA	2.12593	NA	1.78058	2.55658	3.01094	4
PLK2	NA	NA	NA	NA	NA	2.00828	2.54111	2.99317	3
EPHA2	NA	NA	2.30754	2.88447	NA	NA	2.8571	2.97685	4
CD274	NA	NA	NA	2.89075	NA	NA	0.932047	2.97599	3
LOC400706	NA	NA	NA	NA	2.96178	3.9182	4.49232	2.95946	4
CD177	NA	NA	NA	NA	NA	NA	NA	2.95182	1
ITGA6	NA	NA	NA	1.23518	NA	NA	1.90251	2.94929	3
NMNAT2	NA	NA	NA	NA	NA	NA	2.04635	2.94076	2
BCL6	NA	NA	NA	0.864382	NA	NA	1.88619	2.93978	3
MAMLD1	NA	NA	NA	NA	2.02744	1.77981	3.65481	2.93375	4
IL13RA2	NA	NA	NA	5.86354	NA	NA	NA	2.93131	2
LAMB1	NA	NA	NA	NA	NA	NA	NA	2.92963	1
PTGR1	NA	NA	NA	NA	NA	NA	NA	2.92247	1
MAP3K5	NA	NA	NA	NA	NA	NA	2.50971	2.90279	2
MIR21	NA	NA	NA	2.7844	NA	NA	1.88852	2.90031	3
GAP43	NA	NA	1.78624	2.43196	2.81809	1.92906	3.72898	2.88794	6
MIR4435-2HG	NA	NA	2.22612	2.54823	2.22215	1.68131	2.80583	2.88209	6
GADD45A	NA	NA	NA	1.37905	NA	1.1216	2.03509	2.88029	4
NRP1	NA	NA	NA	NA	NA	NA	1.21057	2.87826	2
GBP2	NA	NA	NA	2.61965	NA	2.04432	NA	2.86998	3
LYPD1	NA	NA	NA	NA	NA	NA	1.97177	2.8695	2
LIPH	NA	NA	NA	1.71376	NA	NA	NA	2.86192	2
SEMA3C	NA	NA	-1.10142	-1.43676	NA	1.48427	NA	2.8518	4
SFN	NA	NA	NA	1.57051	NA	NA	2.25739	2.8515	3
LINC02404	NA	NA	NA	NA	1.80006	NA	2.84294	2.84847	3
GEM	NA	NA	3.2733	3.98129	NA	NA	3.96297	2.83822	4
RDH10	NA	NA	NA	1.10559	NA	1.61028	NA	2.83512	3
HIVEP2	NA	NA	1.51275	4.01713	NA	NA	NA	2.82144	3
LOC105374003	NA	NA	NA	3.67626	NA	NA	NA	2.81696	2
FAM172BP	NA	NA	NA	2.05889	NA	NA	1.29558	2.7995	3
ACPP	NA	NA	NA	NA	NA	NA	NA	2.79594	1
REST	NA	NA	NA	1.62473	NA	NA	1.59784	2.78731	3
CDH1	NA	NA	NA	NA	NA	1.87441	2.60819	2.77583	3
SLCO4C1	NA	NA	NA	NA	NA	NA	1.8583	2.77025	2
NEDD4	NA	NA	1.07942	1.70529	NA	1.50972	2.24604	2.75714	5
ANTXR2	NA	NA	NA	2.67479	NA	NA	NA	2.74026	2
ZFP36L1	NA	NA	NA	1.7902	NA	NA	NA	2.73358	2
IL6R	NA	NA	NA	1.89325	NA	NA	1.57955	2.72761	3
CLIC2	NA	NA	NA	NA	NA	NA	NA	2.71511	1
C2CD4A	NA	NA	NA	NA	NA	1.37049	2.60516	2.71317	3
SPATS2L	NA	NA	NA	1.63083	1.4575	NA	2.37955	2.70096	4
SQOR	NA	NA	NA	1.47742	NA	NA	NA	2.68824	2
CD9	NA	NA	NA	NA	NA	1.79374	1.52538	2.68463	3
PRDM1	NA	NA	NA	1.35444	NA	NA	2.22068	2.67035	3
ANXA2	NA	NA	NA	1.23476	NA	NA	2.49188	2.6522	3
LIPG	NA	NA	NA	1.97575	NA	NA	1.38381	2.64273	3
SLCO2A1	NA	NA	NA	NA	NA	NA	NA	2.62028	1
VAT1L	NA	NA	NA	-1.1115	NA	NA	NA	2.61824	2
IL13RA1	NA	NA	NA	3.25698	1.80692	1.38927	2.62515	2.61671	5
PLAU	NA	NA	NA	3.55774	NA	NA	0.965529	2.61505	3
TMEM154	NA	NA	NA	1.6739	1.83506	NA	2.09588	2.60669	4
FRK	NA	NA	NA	NA	NA	NA	1.60524	2.59609	2
MYOF	NA	NA	NA	3.79943	NA	NA	NA	2.58049	2
IGFBP7	NA	NA	NA	NA	NA	NA	NA	2.57831	1
S100A10	NA	NA	2.25722	3.29196	NA	NA	1.28606	2.57132	4
ELK3	NA	NA	1.29062	1.8184	NA	NA	2.1121	2.56589	4
TLE1	NA	NA	NA	NA	NA	1.6555	1.77012	2.56111	3
IGHG1	NA	NA	NA	NA	NA	NA	NA	2.55491	1
TMEM2	NA	NA	1.36966	3.06814	NA	NA	1.96143	2.5475	4
ST6GALNAC2	NA	NA	NA	NA	NA	1.20108	NA	2.54488	2
ANGPT2	NA	NA	NA	2.68332	NA	NA	NA	2.53908	2
SAMD5	NA	NA	NA	NA	2.88916	NA	4.78394	2.51744	3
KLF5	NA	NA	NA	1.4873	NA	NA	1.89312	2.50854	3
PCDH9	NA	NA	2.05654	NA	NA	NA	1.35073	2.50321	3
GBP3	NA	NA	NA	NA	NA	NA	NA	2.49387	1
GADD45B	NA	NA	NA	1.17036	NA	NA	NA	2.4912	2
C1orf116	NA	NA	NA	NA	NA	NA	1.18047	2.469	2
NID1	NA	NA	NA	2.08873	NA	1.54723	1.30482	2.46677	4
ADGRE5	NA	NA	NA	3.4013	NA	NA	0.734896	2.46236	3
IFITM3	NA	NA	NA	1.63456	NA	NA	NA	2.45986	2
OSBPL3	NA	NA	NA	NA	NA	NA	NA	2.45443	1
CYTOR	NA	NA	NA	3.44096	1.61842	NA	1.89615	2.42506	4
KIAA0040	NA	NA	NA	NA	NA	NA	1.51998	2.42353	2
TGFBR2	NA	NA	NA	3.06932	1.56151	NA	2.76154	2.4155	4
ADAMTS9	NA	NA	NA	4.03151	NA	NA	2.05238	2.41495	3
EPHA4	NA	NA	NA	NA	NA	1.16041	2.42472	2.40893	3
BACH2	NA	NA	NA	NA	NA	1.3572	2.35506	2.38641	3
LRP10	NA	NA	NA	1.53164	NA	NA	1.4787	2.3852	3
PITPNC1	NA	NA	NA	1.28364	NA	1.14543	NA	2.37996	3
LINC01812	NA	NA	NA	NA	NA	NA	NA	2.37055	1
LOC101928161	NA	NA	NA	NA	NA	NA	NA	2.36353	1
ANTXR1	NA	NA	NA	NA	NA	1.4707	NA	2.36162	2
LOC102724689	NA	NA	NA	NA	NA	NA	NA	2.35289	1
SLITRK1	NA	NA	NA	1.90856	NA	NA	NA	2.35029	2
CTGF	NA	NA	NA	NA	NA	NA	2.64831	2.34903	2
SPRED2	NA	NA	1.80329	2.43897	NA	NA	2.09095	2.34602	4
BMP2	NA	NA	NA	NA	NA	NA	2.14767	2.33691	2
TNFRSF12A	NA	NA	1.48781	1.61464	1.65406	NA	2.5216	2.33664	5
ERRFI1	NA	NA	NA	2.23493	NA	1.13967	2.64816	2.33446	4
SYTL5	NA	NA	NA	2.13592	2.9448	1.78298	4.2026	2.32548	5
SDC2	NA	NA	NA	NA	NA	NA	0.988144	2.32384	2
ANXA4	NA	NA	NA	NA	NA	NA	NA	2.31942	1
ULBP3	NA	NA	NA	1.49063	NA	NA	NA	2.31727	2
CDH6	NA	NA	NA	-1.09234	NA	NA	NA	2.31444	2
TRIB1	NA	NA	NA	NA	NA	NA	1.5903	2.31366	2
SLC6A17	NA	NA	NA	NA	NA	1.16421	2.00456	2.31196	3
MYO5B	NA	NA	NA	NA	NA	1.41446	1.23019	2.31111	3
HSBP1L1	NA	NA	NA	NA	NA	NA	NA	2.29619	1
PTPN22	NA	NA	NA	NA	NA	NA	NA	2.28355	1
ST8SIA4	NA	NA	NA	1.4348	NA	NA	1.61676	2.2786	3
STK17A	NA	NA	NA	NA	1.21297	NA	2.50283	2.27096	3
RASEF	NA	NA	NA	NA	NA	1.36742	2.22139	2.26936	3
MAN2A1	NA	NA	1.00193	1.19403	NA	NA	NA	2.26579	3
MPZL2	NA	NA	NA	NA	NA	NA	2.89488	2.26401	2
GPAT3	NA	NA	NA	3.82082	NA	NA	1.68542	2.26334	3
SOCS3	NA	NA	NA	NA	NA	NA	1.03599	2.2616	2
FN1	NA	2.99351	NA	3.86389	NA	NA	NA	2.25881	3
CASP4	NA	NA	NA	NA	NA	NA	NA	2.25706	1
SH3BGRL3	NA	NA	2.12061	2.41604	NA	1.29089	1.66906	2.25549	5
VGF	2.73768	NA	5.72913	3.46683	2.02378	1.83778	3.739	2.25209	7
ELF1	NA	NA	0.924999	1.88147	NA	NA	1.12363	2.24626	4
ASS1	NA	NA	NA	NA	NA	1.09503	1.24472	2.24051	3
PRSS2	NA	NA	NA	NA	NA	NA	NA	2.24012	1
FHL2	NA	NA	NA	NA	NA	NA	NA	2.23582	1
PLEK2	NA	NA	2.42277	3.92489	NA	1.09772	2.75217	2.2176	5
PDGFRL	NA	NA	NA	NA	NA	NA	0.989673	2.21069	2
SOX9	NA	NA	NA	NA	NA	NA	2.06491	2.21002	2
FRRS1	NA	NA	NA	NA	1.32172	NA	1.58256	2.20745	3
CTBS	NA	NA	NA	NA	NA	NA	1.68192	2.18056	2
DUSP5	NA	NA	2.24367	1.77171	NA	NA	NA	2.17708	3
CEACAM6	NA	NA	NA	NA	NA	NA	NA	2.17334	1
CEACAM5	NA	NA	NA	NA	NA	NA	1.70928	2.16908	2
KCNK10	NA	NA	NA	NA	1.73703	2.01652	2.14438	2.16548	4
SPRED1	NA	NA	1.45007	1.65694	1.70627	NA	2.87674	2.15922	5
ANXA3	NA	NA	NA	2.1154	NA	NA	NA	2.1464	2
PHLDA2	NA	NA	NA	NA	2.14932	NA	3.16918	2.14486	3
PLPP2	NA	NA	NA	NA	1.3697	1.52234	2.08521	2.14266	4
AHR	NA	NA	NA	1.95767	NA	NA	1.22813	2.13319	3
CRYBG1	NA	NA	NA	NA	NA	NA	NA	2.13294	1
SH2D4A	NA	NA	NA	NA	NA	NA	1.54637	2.12332	2
EPHX4	NA	NA	NA	NA	NA	NA	2.48101	2.12237	2
KLF6	NA	NA	NA	NA	NA	NA	0.836359	2.12013	2
GAL	NA	NA	3.02467	1.91517	1.95105	NA	2.72808	2.11857	5
CLCA4	NA	NA	NA	NA	NA	NA	NA	2.11563	1
PGM2L1	NA	NA	NA	NA	NA	1.23781	0.877048	2.11379	3
ARHGAP18	NA	NA	0.991843	1.72584	NA	NA	NA	2.11323	3
DUSP10	NA	NA	NA	NA	NA	1.34387	1.66147	2.11275	3
LIF	NA	NA	NA	NA	NA	NA	3.78429	2.11208	2
ARRB1	NA	NA	NA	NA	NA	NA	1.44881	2.1064	2
CYP4X1	NA	NA	NA	NA	NA	NA	NA	2.10242	1
TM6SF1	NA	NA	NA	NA	NA	1.80092	1.42185	2.09507	3
ID1	NA	NA	NA	2.16541	NA	NA	1.3848	2.08893	3
NABP1	NA	NA	NA	NA	NA	NA	NA	2.08711	1
SCIN	NA	NA	NA	NA	NA	1.55918	1.63863	2.07358	3
ANGPTL2	NA	NA	NA	NA	NA	NA	NA	2.06959	1
LCP1	NA	NA	NA	1.65289	NA	NA	NA	2.06897	2
FGF2	NA	NA	NA	1.2071	NA	NA	1.71148	2.06881	3
PLEKHH2	NA	NA	NA	1.96935	NA	2.09801	2.5371	2.06644	4
TMEM156	NA	NA	NA	5.03459	NA	NA	NA	2.06608	2
LAMA4	NA	NA	NA	1.52954	NA	0.975473	1.92421	2.06479	4
LEF1	NA	NA	NA	NA	NA	NA	1.39633	2.06206	2
ADAMTS15	NA	NA	NA	NA	NA	NA	1.59549	2.06065	2
SEL1L3	NA	NA	NA	1.26185	NA	NA	1.5889	2.05516	3
LGALS3	NA	NA	NA	NA	NA	NA	NA	2.0532	1
KRT19	NA	NA	NA	NA	NA	NA	1.21651	2.05239	2
CITED2	NA	NA	NA	1.94214	NA	NA	NA	2.04933	2
SERPINI1	NA	NA	NA	NA	2.3342	1.58529	2.9862	2.04184	4
LRP4	NA	NA	NA	NA	NA	NA	NA	2.03847	1
PLAT	NA	NA	NA	2.48618	NA	NA	NA	2.03153	2
EFNA1	NA	NA	NA	NA	NA	NA	1.4035	2.03078	2
APOD	NA	NA	NA	NA	1.24695	NA	2.16043	2.02923	3
PLCB1	NA	NA	NA	NA	2.50104	1.73964	2.51702	2.02906	4
MMP2	NA	NA	NA	2.30159	NA	NA	NA	2.02242	2
PMAIP1	NA	NA	NA	1.03885	NA	NA	NA	2.01776	2
S100A16	NA	NA	NA	2.26219	NA	NA	1.14653	2.00383	3
CPM	NA	NA	NA	4.60337	NA	NA	NA	2.00353	2
ADM	NA	NA	NA	NA	1.46997	NA	1.72488	1.99695	3
LANCL3	NA	NA	NA	NA	1.62972	1.29463	2.65266	1.99274	4
CHST15	NA	NA	NA	NA	NA	NA	2.04039	1.9884	2
TNFAIP3	NA	NA	NA	2.64594	NA	NA	NA	1.98197	2
ERN1	NA	NA	NA	NA	NA	1.24741	2.40576	1.97779	3
GNG5	NA	NA	NA	NA	NA	NA	1.8407	1.97777	2
APOBEC3C	NA	NA	NA	2.58894	NA	1.49851	NA	1.97762	3
TCP11L2	NA	NA	NA	NA	NA	NA	NA	1.96706	1
EFEMP1	NA	NA	NA	NA	NA	NA	NA	1.96592	1
PTN	NA	NA	NA	NA	NA	1.39467	1.60744	1.95799	3
TMEM45B	NA	NA	NA	1.63385	1.56051	1.45225	2.4895	1.95287	5
POLR3G	NA	NA	NA	NA	1.6265	NA	1.94369	1.9478	3
DCBLD2	NA	NA	NA	2.10111	NA	NA	NA	1.94318	2
LGMN	NA	NA	NA	NA	NA	1.31831	1.12725	1.94164	3
RBMS1	NA	NA	NA	1.18744	NA	NA	NA	1.93028	2
MEF2C	NA	NA	NA	1.37588	NA	1.6058	NA	1.92419	3
GRWD1	NA	NA	1.81042	1.34451	NA	1.74199	1.37324	1.92215	5
ERAP2	NA	NA	NA	NA	NA	NA	NA	1.91944	1
USP53	NA	NA	NA	1.40078	NA	NA	NA	1.91761	2
SDC4	NA	NA	1.10388	1.58989	NA	NA	0.904029	1.91446	4
LONRF3	NA	NA	NA	NA	NA	NA	1.77799	1.91292	2
PALMD	NA	NA	NA	NA	NA	NA	NA	1.9093	1
NCEH1	NA	NA	NA	1.39236	NA	NA	NA	1.90443	2
NETO1	NA	NA	NA	NA	NA	NA	4.31042	1.90378	2
VCAN	NA	NA	NA	3.58471	NA	NA	NA	1.89945	2
LINC02454	NA	NA	NA	NA	NA	NA	NA	1.89847	1
SCG2	NA	NA	NA	2.33346	2.1995	1.31414	2.89696	1.89128	5
HEG1	NA	NA	NA	2.37563	NA	NA	NA	1.88957	2
MMP13	NA	NA	NA	NA	NA	NA	NA	1.8874	1
MCTP1	NA	NA	NA	NA	NA	NA	1.44029	1.88406	2
LGALS3BP	NA	NA	NA	2.50932	NA	1.86814	NA	1.88285	3
GPRC5A	NA	NA	NA	1.33475	NA	NA	NA	1.87926	2
FHL3	NA	NA	2.05636	1.86044	NA	1.12495	1.94812	1.87697	5
ARPC1B	NA	NA	NA	NA	NA	0.938359	1.04157	1.86922	3
TRAM2	NA	NA	NA	NA	NA	NA	1.7359	1.86905	2
TREM1	NA	NA	NA	NA	NA	NA	NA	1.86547	1
GPR50	NA	NA	NA	NA	NA	NA	4.59716	1.86544	2
C1QL2	NA	NA	NA	NA	1.6801	1.41921	2.49886	1.86515	4
GPX8	NA	NA	NA	2.24035	NA	NA	NA	1.8546	2
SLFN5	NA	NA	NA	1.05908	NA	NA	NA	1.85315	2
RND3	NA	NA	1.98032	4.03651	NA	NA	1.8956	1.85127	4
LSR	NA	NA	NA	NA	NA	1.30758	NA	1.84451	2
LAMP5	NA	NA	NA	NA	NA	NA	NA	1.84446	1
GRN	NA	NA	NA	NA	NA	NA	NA	1.84326	1
GRIN2B	NA	NA	NA	NA	NA	NA	NA	1.84299	1
KLF10	NA	NA	NA	NA	NA	1.00717	2.07674	1.8425	3
LOC101927479	NA	NA	NA	NA	NA	NA	2.68244	1.83806	2
MT1X	NA	NA	NA	NA	NA	NA	NA	1.8356	1
PRKAA2	NA	NA	NA	NA	NA	NA	1.76657	1.83483	2
FYB2	NA	NA	NA	NA	NA	1.60532	3.26863	1.83448	3
ETV1	NA	NA	NA	2.32077	NA	NA	1.8254	1.82415	3
VCL	NA	NA	NA	1.52303	NA	NA	1.30155	1.81953	3
ITPKB	NA	NA	NA	NA	NA	NA	1.91569	1.81806	2
SCD5	NA	NA	NA	NA	NA	NA	NA	1.81701	1
ABHD17C	NA	NA	NA	NA	NA	NA	1.33105	1.8123	2
KCNK1	NA	NA	1.39012	1.23	NA	NA	1.39635	1.80585	4
CRYBG3	NA	NA	NA	-1.16774	NA	NA	NA	1.80373	2
PXDC1	NA	NA	NA	1.14317	NA	NA	NA	1.8037	2
CDH10	NA	NA	NA	NA	NA	NA	NA	1.80064	1
SGK1	NA	NA	NA	1.3888	NA	NA	1.2453	1.77741	3
IL6ST	NA	NA	NA	NA	NA	NA	1.43331	1.77214	2
SMAGP	NA	NA	NA	1.85088	NA	NA	NA	1.76403	2
NTRK2	NA	NA	NA	NA	1.48343	NA	2.21205	1.76046	3
SLC9A9	NA	NA	NA	2.52683	NA	NA	NA	1.75768	2
SF3B4	NA	NA	NA	NA	NA	1.3746	NA	1.75536	2
BVES	NA	NA	NA	NA	NA	NA	NA	1.75429	1
TNFSF15	NA	NA	NA	NA	NA	NA	1.78674	1.75357	2
LDLR	NA	NA	NA	2.08285	NA	1.35566	0.945634	1.75183	4
DTNA	NA	NA	NA	NA	NA	NA	0.829136	1.74893	2
LPAR3	NA	NA	NA	NA	NA	NA	NA	1.74885	1
HBEGF	NA	NA	NA	2.94865	NA	NA	1.86021	1.7422	3
PPP1R15A	NA	NA	NA	1.44697	NA	NA	NA	1.74212	2
TMEM255A	NA	NA	NA	NA	NA	NA	NA	1.74074	1
HIST1H3H	NA	NA	NA	NA	NA	NA	NA	1.74062	1
KLF7	NA	NA	NA	NA	NA	NA	NA	1.73902	1
PROS1	NA	NA	NA	2.66863	NA	NA	NA	1.73398	2
INPP4B	NA	NA	NA	NA	NA	NA	1.16476	1.73023	2
CDK2AP2	NA	NA	NA	NA	NA	NA	NA	1.7294	1
NRP2	NA	NA	NA	2.2546	NA	NA	1.44587	1.72553	3
SIPA1L2	NA	NA	1.06821	1.36645	1.23953	1.30456	1.67146	1.72309	6
SHC4	NA	NA	1.70247	2.58741	NA	NA	NA	1.71718	3
PPP1R14C	NA	NA	NA	NA	NA	NA	1.85241	1.71573	2
DLGAP1-AS1	NA	NA	NA	1.36067	NA	NA	1.86515	1.71423	3
ITGAV	NA	NA	NA	2.42459	NA	NA	NA	1.70985	2
TGFBR3L	NA	NA	NA	NA	NA	NA	NA	1.70543	1
MOXD1	NA	NA	NA	NA	NA	NA	NA	1.69884	1
KITLG	NA	NA	NA	2.61733	NA	NA	NA	1.69799	2
NAV3	NA	NA	NA	NA	NA	NA	NA	1.69258	1
IGFL4	NA	NA	NA	NA	1.72593	1.61166	3.32171	1.68284	4
MANBA	NA	NA	NA	NA	NA	NA	NA	1.68157	1
GPR3	NA	NA	2.94533	2.21049	1.36017	NA	1.75766	1.68027	5
CITED4	NA	NA	NA	NA	NA	NA	1.59702	1.67797	2
LMO7	NA	NA	NA	2.41096	NA	NA	NA	1.67728	2
RHOJ	NA	NA	NA	NA	NA	1.38392	1.45782	1.67623	3
PLPP3	NA	NA	NA	1.46542	NA	NA	0.798979	1.67267	3
PDGFC	NA	NA	NA	NA	NA	NA	NA	1.66812	1
BAG3	NA	NA	NA	1.66974	NA	NA	NA	1.66058	2
CREB3L2	NA	NA	NA	1.08103	NA	NA	1.34377	1.66014	3
SMOC1	NA	NA	NA	NA	NA	1.18345	1.49977	1.65716	3
ELF4	NA	NA	NA	1.15641	NA	NA	1.74115	1.65555	3
MAP3K6	NA	NA	NA	NA	NA	NA	1.75966	1.65337	2
TEAD4	NA	NA	NA	NA	NA	NA	NA	1.65285	1
LOC105372636	NA	NA	NA	NA	NA	NA	NA	1.6524	1
CLIC1	NA	NA	1.24328	1.47164	NA	NA	1.57806	1.65059	4
PCP4	NA	NA	NA	NA	NA	NA	NA	1.65007	1
FERMT1	NA	NA	NA	NA	NA	NA	NA	1.64879	1
ASB5	NA	NA	NA	NA	NA	NA	NA	1.64724	1
MAML2	NA	NA	NA	NA	NA	NA	NA	1.64662	1
CDCP1	NA	NA	NA	3.66152	NA	NA	1.09182	1.6457	3
RGS4	NA	NA	2.31424	4.36853	NA	NA	3.20253	1.64462	4
TMOD1	NA	NA	NA	NA	NA	NA	NA	1.63975	1
SPINT1	NA	NA	NA	NA	NA	NA	0.86462	1.63849	2
B4GALT1	NA	NA	NA	1.70674	NA	NA	NA	1.63843	2
HLA-A	NA	NA	NA	NA	NA	1.48503	0.979971	1.63664	3
ACSL5	NA	NA	NA	3.45355	NA	NA	NA	1.63182	2
WDR49	NA	NA	NA	NA	NA	1.26211	NA	1.63154	2
LPP	NA	NA	NA	1.51539	NA	1.35181	1.60986	1.63093	4
ANKRD36C	NA	NA	NA	NA	NA	NA	2.54187	1.62447	2
NFKBIZ	NA	NA	NA	NA	NA	NA	1.48642	1.62259	2
SLC39A8	NA	NA	NA	1.77694	NA	NA	NA	1.62104	2
LIMCH1	NA	NA	NA	NA	NA	NA	0.908912	1.62093	2
HHLA3	NA	NA	NA	1.69003	NA	NA	NA	1.61929	2
VLDLR	NA	NA	NA	1.08612	NA	1.31664	1.36599	1.61607	4
TP53I11	NA	NA	NA	NA	NA	NA	2.26739	1.61417	2
MT2A	NA	NA	NA	NA	NA	NA	1.71075	1.61137	2
LPXN	NA	NA	NA	NA	NA	NA	1.1742	1.61133	2
ITGB8	NA	NA	NA	NA	NA	NA	NA	1.60222	1
PLS3	NA	NA	NA	0.9827	NA	NA	NA	1.59878	2
LOC102725104	NA	NA	NA	NA	NA	NA	1.84518	1.59331	2
ARHGAP5-AS1	NA	NA	NA	NA	NA	NA	NA	1.5878	1
TGFA	NA	NA	NA	NA	NA	NA	NA	1.58744	1
SERTAD1	NA	NA	NA	1.80737	NA	NA	2.21631	1.58743	3
PTPN13	NA	NA	NA	NA	NA	NA	NA	1.58422	1
GRAMD1C	NA	NA	NA	1.15175	NA	NA	1.02711	1.58381	3
PLP2	NA	NA	NA	NA	NA	0.90247	NA	1.57824	2
PARP9	NA	NA	NA	NA	NA	NA	NA	1.57463	1
SIGLEC15	NA	NA	NA	NA	NA	NA	1.31266	1.57436	2
ABR	NA	NA	NA	1.05831	NA	1.23049	1.41508	1.57001	4
SRPX	NA	NA	0.99363	4.63657	NA	NA	0.974095	1.56953	4
CDKN2B	NA	NA	NA	3.42462	NA	NA	NA	1.56949	2
JUNB	NA	NA	1.03806	NA	NA	NA	1.65377	1.56766	3
AHNAK2	NA	NA	NA	NA	NA	NA	NA	1.5673	1
RAET1E	NA	NA	NA	NA	1.42847	NA	2.1619	1.56467	3
LOC105747689	NA	NA	NA	NA	NA	NA	NA	1.56299	1
UBASH3B	NA	NA	NA	NA	NA	NA	1.51154	1.55363	2
IQGAP1	NA	NA	NA	1.25236	NA	NA	1.36126	1.55157	3
MALL	NA	NA	NA	NA	NA	NA	NA	1.54801	1
EVA1A	NA	NA	NA	1.22929	NA	NA	1.06634	1.54684	3
NLGN1	NA	NA	NA	NA	NA	NA	NA	1.54571	1
RBMS2	NA	NA	NA	2.0258	NA	NA	NA	1.5457	2
B3GLCT	NA	NA	NA	2.1273	NA	NA	1.28238	1.54549	3
SLC12A2	NA	NA	NA	NA	1.79936	1.25119	2.86574	1.54397	4
RGL1	NA	NA	NA	NA	NA	NA	1.90202	1.54229	2
KCTD12	NA	NA	NA	NA	1.86697	NA	3.37085	1.53907	3
DCLK1	NA	NA	2.02168	1.62377	1.46949	NA	3.21171	1.53535	5
CYR61	NA	NA	NA	2.12489	NA	NA	NA	1.53224	2
SULF2	NA	NA	NA	NA	NA	NA	NA	1.53156	1
SEZ6	NA	NA	NA	NA	NA	1.49523	1.60299	1.52542	3
GDE1	NA	NA	NA	NA	NA	NA	NA	1.524	1
TSHZ2	NA	NA	NA	NA	NA	NA	NA	1.52388	1
CAVIN1	NA	NA	1.10867	1.93118	NA	NA	NA	1.51744	3
MIR4653	NA	NA	NA	NA	NA	NA	NA	1.51582	1
DLG3-AS1	NA	NA	NA	NA	NA	NA	NA	1.51269	1
DAGLB	NA	NA	NA	NA	NA	NA	NA	1.50931	1
LOC105376374	NA	NA	NA	NA	NA	NA	NA	1.50618	1
GNB4	NA	NA	NA	1.17873	NA	NA	1.49538	1.50491	3
MIR635	NA	NA	NA	NA	NA	NA	NA	1.50333	1
ITPR3	NA	NA	NA	NA	NA	NA	1.89223	1.50167	2
SUSD4	NA	NA	NA	-1.14393	NA	NA	2.63752	1.50017	3
BHLHE40	NA	NA	0.976803	NA	NA	NA	1.67437	1.49927	3
FZD1	NA	NA	NA	NA	NA	NA	1.25651	1.49611	2
RAB38	NA	NA	NA	NA	NA	NA	NA	1.49595	1
RPS6KA3	NA	NA	NA	1.75952	NA	NA	2.0861	1.49547	3
LOC105377495	NA	NA	NA	NA	NA	NA	NA	1.49421	1
CTSC	NA	NA	NA	NA	NA	NA	NA	1.4936	1
FKBP14	NA	NA	NA	1.34162	NA	NA	NA	1.49225	2
DLGAP1-AS2	NA	NA	1.17161	2.84378	NA	NA	NA	1.49183	3
PLA2G16	NA	NA	NA	NA	NA	NA	NA	1.48869	1
DST	NA	NA	NA	NA	NA	NA	NA	1.48843	1
MMP1	NA	NA	NA	2.40739	NA	NA	NA	1.48817	2
CHGB	NA	NA	1.1427	NA	NA	NA	1.65082	1.48665	3
JUN	NA	NA	NA	NA	NA	NA	1.87162	1.47327	2
SYT17	NA	NA	NA	NA	NA	NA	NA	1.47192	1
SMPDL3A	NA	NA	NA	NA	NA	NA	NA	1.47085	1
PDLIM1	NA	NA	NA	NA	NA	1.15009	NA	1.46635	2
DLX5	NA	1.71103	NA	1.62972	NA	1.3798	NA	1.46595	4
GPX3	NA	NA	NA	NA	NA	NA	1.32326	1.4655	2
SLC7A11	NA	NA	NA	NA	NA	1.02641	0.8878	1.46536	3
HLA-C	NA	NA	NA	NA	NA	NA	NA	1.45942	1
CHL1	NA	NA	NA	NA	NA	1.33578	NA	1.45939	2
FSTL1	NA	NA	NA	1.11848	NA	NA	NA	1.45903	2
TMEFF2	NA	NA	NA	NA	NA	NA	1.30251	1.45577	2
DTX3L	NA	NA	NA	NA	NA	NA	NA	1.4553	1
KCNH1	NA	NA	NA	NA	NA	NA	1.3265	1.45371	2
MYL12A	NA	NA	NA	NA	NA	NA	NA	1.45324	1
C3orf52	NA	NA	NA	1.44381	NA	NA	NA	1.45077	2
EOGT	NA	NA	NA	NA	NA	NA	1.04982	1.44628	2
RRAS	NA	NA	NA	2.07739	NA	NA	NA	1.44356	2
ZYX	NA	NA	2.21375	2.77486	NA	NA	1.79167	1.44226	4
RIPK2	NA	NA	NA	NA	NA	NA	NA	1.4388	1
CACNG4	NA	NA	NA	NA	NA	NA	NA	1.43842	1
LINC01123	NA	NA	NA	NA	NA	NA	1.4102	1.43805	2
PCDH7	NA	NA	NA	3.78439	NA	NA	NA	1.43781	2
CA5BP1	NA	NA	1.2789	NA	NA	1.1806	NA	1.43507	3
NUCB1	NA	NA	NA	NA	NA	1.01703	NA	1.4319	2
MYH15	NA	NA	2.7388	2.91454	NA	NA	NA	1.42659	3
CLDN3	NA	NA	NA	NA	NA	NA	NA	1.42449	1
SLC2A3	NA	NA	NA	2.74914	NA	NA	NA	1.41988	2
ATP2C2	NA	NA	NA	NA	NA	0.998245	1.33144	1.41945	3
ERVK-7	NA	NA	NA	NA	NA	NA	NA	1.41851	1
SERPINH1	NA	NA	NA	2.52321	NA	NA	1.09407	1.4151	3
INAFM1	NA	NA	NA	NA	NA	NA	NA	1.41032	1
TMEM87B	NA	NA	1.96674	2.74471	NA	NA	1.44781	1.40811	4
TMEM43	NA	NA	NA	NA	NA	NA	NA	1.40777	1
NPC1	NA	NA	NA	1.0062	NA	NA	NA	1.40759	2
CD55	NA	NA	NA	1.2544	NA	NA	NA	1.40737	2
ADAM28	NA	NA	NA	3.55345	NA	NA	NA	1.4069	2
EXPH5	NA	NA	NA	NA	NA	NA	NA	1.40543	1
ZFP36L2	NA	NA	NA	1.50664	NA	NA	NA	1.40498	2
DUSP4	NA	NA	2.96678	3.00125	NA	1.31189	1.13516	1.40481	5
STEAP3	NA	NA	NA	NA	NA	1.01632	NA	1.40366	2
MIG7	NA	NA	NA	1.05644	NA	NA	NA	1.39976	2
PPIC	NA	NA	NA	NA	NA	NA	NA	1.39901	1
TPBG	NA	NA	NA	1.3918	NA	NA	NA	1.39862	2
CTSD	NA	NA	NA	NA	NA	NA	NA	1.39523	1
CCBE1	NA	NA	NA	NA	NA	NA	NA	1.38978	1
ARHGAP26	NA	NA	NA	NA	NA	NA	NA	1.38826	1
TCIM	NA	NA	NA	3.10216	NA	NA	NA	1.38824	2
ERF	NA	NA	NA	NA	NA	NA	NA	1.38459	1
SSFA2	NA	NA	NA	1.27731	NA	NA	1.44444	1.38339	3
CORO2B	NA	NA	NA	NA	NA	NA	1.43686	1.38276	2
IER2	NA	NA	1.74378	1.24232	NA	NA	1.64157	1.38205	4
MIR548V	NA	NA	NA	NA	NA	NA	NA	1.38147	1
ABHD3	NA	NA	NA	NA	NA	NA	0.987038	1.3779	2
FOXC1	NA	NA	NA	NA	NA	NA	NA	1.37784	1
IRF6	NA	NA	NA	NA	NA	NA	NA	1.37663	1
PTCHD1	NA	NA	NA	2.47207	NA	NA	1.63816	1.37483	3
IFI30	NA	NA	NA	NA	NA	NA	NA	1.37094	1
TPP1	NA	NA	NA	NA	NA	NA	NA	1.36442	1
CCDC6	NA	NA	NA	NA	NA	NA	NA	1.36418	1
SMPD1	NA	NA	NA	1.27222	NA	1.1271	NA	1.36361	3
THSD7A	NA	NA	NA	NA	NA	NA	NA	1.36175	1
LINC-PINT	NA	NA	NA	2.02883	NA	NA	NA	1.36161	2
MYD88	NA	NA	NA	NA	NA	NA	NA	1.3605	1
LCK	NA	NA	NA	NA	NA	NA	1.58196	1.35962	2
TSLP	NA	NA	NA	NA	NA	NA	NA	1.3588	1
WFDC2	NA	NA	NA	NA	NA	NA	NA	1.35837	1
SNX9	NA	NA	NA	1.00908	NA	NA	1.2527	1.35297	3
KCNQ5	NA	NA	NA	NA	NA	NA	NA	1.3528	1
ETV4	NA	2.54167	3.80042	4.57655	NA	NA	NA	1.35263	4
FOSL2	NA	NA	NA	1.43783	NA	NA	NA	1.35229	2
AGR2	NA	NA	NA	NA	NA	NA	NA	1.3506	1
NEFM	NA	NA	NA	NA	NA	NA	NA	1.34984	1
F2RL1	NA	NA	NA	1.44186	NA	NA	NA	1.34954	2
DOCK5	NA	NA	NA	1.97055	NA	NA	1.49558	1.34842	3
GSDMA	NA	NA	NA	NA	1.93416	1.01817	4.23085	1.34704	4
C8orf88	NA	NA	NA	NA	NA	NA	2.26371	1.34676	2
ENTPD3	NA	NA	NA	NA	NA	NA	0.897072	1.34201	2
PRSS23	NA	NA	NA	1.27845	NA	NA	NA	1.33764	2
ENPP1	NA	NA	NA	NA	NA	NA	NA	1.33653	1
LPP-AS2	NA	NA	NA	NA	NA	NA	1.3524	1.33566	2
ATF3	NA	NA	NA	NA	NA	NA	NA	1.33354	1
PTK2B	NA	NA	NA	NA	NA	NA	1.41421	1.33233	2
FUCA2	NA	NA	NA	NA	NA	NA	NA	1.32819	1
PLOD3	NA	NA	NA	NA	NA	1.0351	NA	1.32808	2
LAT	NA	NA	NA	NA	NA	NA	1.2744	1.32587	2
ALK	NA	NA	NA	NA	1.69756	NA	2.31359	1.32518	3
DIAPH2	NA	NA	NA	NA	NA	NA	NA	1.32497	1
KRT15	NA	NA	NA	NA	NA	NA	NA	1.32369	1
LOC100507065	NA	NA	NA	NA	NA	NA	NA	1.32362	1
LY96	NA	NA	NA	NA	NA	NA	NA	1.31433	1
APOL6	NA	NA	NA	NA	NA	NA	NA	1.31406	1
TRAPPC1	NA	NA	NA	0.954554	NA	NA	NA	1.314	2
INPP5D	NA	NA	NA	NA	NA	NA	1.4988	1.31252	2
C6orf52	NA	NA	NA	NA	NA	NA	NA	1.30933	1
SLC26A2	NA	NA	NA	NA	NA	NA	1.10284	1.30778	2
CTSV	NA	NA	NA	NA	2.27376	NA	3.47368	1.3068	3
MGLL	NA	NA	NA	NA	NA	NA	NA	1.30636	1
CASP7	NA	NA	NA	1.90856	NA	NA	NA	1.30503	2
FGF5	NA	NA	NA	4.52315	NA	NA	NA	1.30386	2
MSN	NA	NA	NA	NA	NA	NA	NA	1.30011	1
TSPAN1	NA	NA	NA	NA	NA	NA	NA	1.30006	1
NES	NA	NA	1.19501	2.1438	NA	NA	2.0629	1.29996	4
NOL6	NA	NA	NA	NA	NA	NA	NA	1.29707	1
SERPINB8	NA	NA	NA	NA	NA	NA	NA	1.29562	1
C19orf54	NA	NA	NA	NA	NA	NA	NA	1.29492	1
C10orf55	NA	NA	NA	2.86797	NA	NA	NA	1.28805	2
AKAP12	NA	NA	NA	NA	NA	NA	1.13522	1.28779	2
LOC105371453	NA	NA	NA	NA	NA	NA	1.19318	1.28689	2
PKIB	NA	NA	NA	NA	NA	NA	NA	1.28346	1
ARL4C	NA	NA	NA	NA	NA	NA	1.55091	1.28163	2
FERMT2	NA	NA	0.89715	1.31125	NA	NA	1.28703	1.28106	4
PON2	NA	NA	NA	NA	NA	NA	0.840033	1.28008	2
APLN	NA	NA	NA	NA	NA	NA	NA	1.27932	1
CLIP1	NA	NA	NA	NA	NA	NA	0.838948	1.27781	2
CASP8	NA	NA	NA	0.924584	NA	NA	NA	1.27665	2
KCND3	NA	NA	NA	NA	1.28007	NA	2.32779	1.27585	3
NQO1	NA	NA	NA	2.90551	1.49226	NA	1.58228	1.27523	4
SLC35F2	NA	NA	NA	NA	NA	NA	NA	1.27259	1
RNASE7	NA	NA	NA	NA	NA	NA	NA	1.27251	1
PLOD1	NA	NA	NA	1.64326	NA	NA	NA	1.27215	2
ADAM9	NA	NA	NA	1.17794	NA	NA	NA	1.27167	2
DYSF	NA	NA	NA	NA	1.44431	0.943813	1.68021	1.27117	4
PARVA	NA	NA	NA	NA	NA	NA	NA	1.27106	1
BRINP1	NA	NA	NA	NA	NA	NA	1.52736	1.27069	2
NFKBIA	NA	NA	NA	NA	NA	NA	NA	1.27033	1
2006-09-01	NA	NA	1.1621	NA	NA	NA	1.03212	1.26835	3
PAM	NA	NA	1.35757	2.43884	NA	1.13217	0.964935	1.26704	5
MYOSLID	NA	NA	NA	NA	NA	NA	NA	1.26617	1
COPE	NA	NA	NA	NA	NA	NA	NA	1.26583	1
EHD4	NA	NA	NA	NA	NA	NA	NA	1.26573	1
TMC7	NA	NA	NA	2.53463	NA	NA	NA	1.26453	2
TIMP4	NA	NA	NA	NA	NA	NA	NA	1.26099	1
MBNL2	NA	NA	NA	NA	NA	NA	NA	1.26073	1
TNFRSF10B	NA	NA	NA	2.02645	NA	NA	1.32205	1.25847	3
GPRIN3	NA	NA	NA	NA	NA	NA	1.83046	1.25701	2
FRMD6	NA	NA	NA	1.4345	NA	NA	1.00776	1.25467	3
PIWIL1	NA	NA	NA	NA	NA	NA	2.40141	1.2546	2
CCNA1	NA	NA	NA	2.24283	NA	NA	NA	1.2505	2
PLD1	NA	NA	NA	1.3634	NA	NA	NA	1.2503	2
ABLIM3	NA	NA	NA	NA	NA	NA	NA	1.24922	1
ZNF600	NA	NA	NA	NA	NA	NA	NA	1.24835	1
ECH1	NA	NA	NA	1.11737	NA	1.15022	NA	1.24708	3
DNMBP	NA	NA	NA	2.47625	NA	NA	1.51746	1.24642	3
C9orf135	NA	NA	NA	NA	1.67617	NA	1.94192	1.24571	3
CMTM3	NA	NA	NA	NA	NA	NA	1.13634	1.24502	2
PRR13	NA	NA	NA	NA	NA	NA	NA	1.24465	1
TAPBP	NA	NA	NA	0.910566	NA	NA	NA	1.24455	2
AGAP2-AS1	NA	NA	NA	NA	NA	NA	NA	1.24063	1
SLC7A8	NA	NA	NA	2.55285	NA	NA	NA	1.2373	2
MIR4668	NA	NA	NA	NA	NA	NA	NA	1.23652	1
DRAM1	NA	NA	NA	3.66372	NA	NA	NA	1.23566	2
TEC	NA	NA	NA	NA	NA	NA	NA	1.23332	1
AKAP13	NA	NA	NA	NA	NA	NA	0.906035	1.23231	2
MYO1C	NA	NA	NA	NA	NA	NA	NA	1.23183	1
PRAG1	NA	NA	NA	NA	NA	NA	NA	1.23136	1
SLC3A2	NA	NA	NA	NA	NA	NA	NA	1.23106	1
NIPAL2	NA	NA	NA	NA	NA	NA	1.24878	1.23072	2
ATP5D	NA	NA	NA	NA	NA	NA	NA	1.23005	1
DUSP3	NA	NA	NA	0.97257	NA	NA	0.929969	1.22725	3
DDIT3	NA	NA	NA	NA	NA	NA	NA	1.22468	1
RNF19B	NA	NA	NA	NA	NA	NA	NA	1.22441	1
WBP2	NA	NA	NA	1.44144	NA	NA	NA	1.22381	2
PTPRU	NA	NA	NA	NA	NA	1.19326	1.57872	1.22365	3
AHNAK	NA	NA	NA	1.95151	NA	NA	NA	1.22216	2
LRRC8C	NA	NA	NA	1.1241	NA	NA	NA	1.22029	2
ELOVL1	NA	NA	NA	NA	NA	NA	NA	1.21978	1
SEC24D	NA	NA	NA	NA	NA	NA	1.04621	1.2159	2
PDE4D	NA	NA	NA	NA	NA	NA	NA	1.21206	1
SMARCA2	NA	NA	NA	NA	NA	NA	NA	1.21071	1
ANKRD20A4	NA	NA	NA	NA	NA	NA	NA	1.20742	1
ANXA2P1	NA	NA	NA	NA	NA	NA	NA	1.20371	1
RASAL2	NA	NA	NA	NA	NA	NA	NA	1.20365	1
DOCK1	NA	NA	NA	NA	NA	NA	1.31054	1.20158	2
RHBDF2	NA	NA	NA	NA	NA	NA	NA	1.19961	1
WWTR1	NA	NA	NA	0.910714	NA	NA	1.45273	1.19956	3
KRT80	NA	NA	NA	NA	NA	NA	NA	1.19952	1
SEMA4B	NA	NA	NA	NA	NA	NA	1.19887	1.19848	2
GOLGA7B	NA	NA	NA	NA	NA	NA	NA	1.19833	1
RNF125	NA	NA	NA	2.20997	NA	NA	NA	1.19658	2
LOC105376177	NA	NA	NA	NA	NA	NA	NA	1.19544	1
KLHL5	NA	NA	NA	1.32852	NA	NA	NA	1.19466	2
CHMP4C	NA	NA	NA	NA	NA	NA	0.917758	1.19393	2
CKAP4	NA	NA	NA	NA	NA	NA	NA	1.19211	1
RNF217	NA	NA	NA	NA	NA	NA	NA	1.19122	1
KLF3	NA	NA	NA	2.10051	NA	NA	NA	1.19026	2
SESN2	NA	NA	NA	NA	NA	NA	NA	1.18968	1
NRM	NA	NA	NA	1.33703	NA	1.07666	NA	1.1871	3
ZDHHC9	NA	NA	NA	NA	NA	NA	NA	1.1867	1
IFITM4P	NA	NA	NA	1.68815	NA	NA	1.10592	1.1865	3
MT1L	NA	NA	NA	NA	NA	NA	NA	1.1861	1
TLL2	NA	NA	NA	NA	NA	NA	NA	1.18168	1
CRABP1	NA	NA	NA	NA	NA	NA	NA	1.18063	1
CBLN1	NA	NA	NA	NA	NA	NA	1.75641	1.1778	2
LAMB3	NA	NA	NA	1.66986	NA	NA	NA	1.17697	2
MYADM	NA	NA	NA	1.15503	NA	NA	0.981044	1.17495	3
LOC729218	NA	NA	NA	NA	NA	NA	NA	1.17444	1
C6orf141	NA	NA	1.73868	2.16574	NA	NA	NA	1.17319	3
CA11	NA	NA	NA	NA	NA	NA	NA	1.17149	1
RGS2	NA	NA	1.86608	2.23314	NA	NA	NA	1.17146	3
POPDC3	NA	NA	NA	NA	NA	NA	NA	1.16952	1
RRBP1	NA	NA	NA	NA	NA	NA	1.07999	1.1668	2
ITGA9	NA	NA	NA	NA	NA	NA	NA	1.16623	1
DRAXIN	NA	NA	NA	NA	NA	NA	NA	1.16437	1
TGFB1I1	NA	NA	NA	1.95637	NA	NA	NA	1.16368	2
TKT	NA	NA	NA	NA	NA	NA	NA	1.16245	1
HIP1	NA	NA	NA	NA	NA	0.893931	1.45537	1.16243	3
STAT3	NA	NA	NA	NA	NA	NA	1.03954	1.16242	2
ABCC3	NA	NA	NA	NA	NA	NA	NA	1.16131	1
NFIC	NA	NA	NA	1.8751	NA	NA	NA	1.15698	2
KRT18	NA	NA	NA	1.98804	NA	NA	1.55482	1.15545	3
HLA-B	NA	NA	NA	NA	NA	NA	NA	1.15305	1
FAM129A	NA	NA	NA	2.66615	NA	NA	NA	1.15154	2
MBOAT1	NA	NA	NA	NA	NA	NA	NA	1.15084	1
SH3RF1	NA	NA	NA	NA	NA	NA	1.01635	1.15083	2
COL4A2	NA	NA	NA	NA	NA	NA	1.21793	1.15016	2
DPY19L1	NA	NA	NA	NA	NA	NA	1.15079	1.14973	2
LSAMP	NA	NA	NA	NA	NA	NA	NA	1.14843	1
LOC107983971	NA	NA	NA	NA	NA	NA	NA	1.14521	1
MIR622	NA	NA	NA	2.17673	NA	NA	1.60934	1.14515	3
PTGFRN	NA	NA	NA	1.26822	NA	NA	0.892332	1.14367	3
SPR	NA	NA	NA	NA	NA	NA	NA	1.1433	1
SDC3	NA	NA	NA	1.59687	NA	NA	NA	1.14086	2
B4GALNT3	NA	NA	NA	NA	NA	1.18929	1.4859	1.14042	3
GALNT14	NA	NA	NA	1.28906	NA	NA	1.07976	1.14023	3
IL1RN	NA	NA	NA	NA	NA	NA	NA	1.13922	1
PTPRG	NA	NA	NA	NA	NA	NA	NA	1.1377	1
DNASE2B	NA	NA	NA	NA	NA	NA	NA	1.1334	1
HOXB9	NA	NA	NA	NA	NA	NA	NA	1.13271	1
NBDY	NA	NA	NA	NA	NA	NA	NA	1.13008	1
CALD1	NA	NA	NA	1.12443	NA	NA	1.29292	1.12965	3
CAST	NA	NA	NA	NA	NA	NA	NA	1.12889	1
NFAT5	NA	NA	NA	1.84062	NA	NA	NA	1.12492	2
STRA6	NA	NA	NA	NA	NA	NA	1.15809	1.12429	2
ZNF888	NA	NA	NA	NA	NA	NA	NA	1.12155	1
ACD	NA	NA	NA	0.95594	NA	NA	NA	1.12117	2
TCN2	NA	NA	NA	1.03119	NA	NA	NA	1.12089	2
HEXB	NA	NA	NA	NA	NA	NA	0.877991	1.12076	2
LAMC1	NA	NA	NA	1.33447	NA	NA	1.42855	1.1202	3
NAMPT	NA	NA	NA	1.41701	NA	NA	1.39915	1.11949	3
PDIA5	NA	NA	NA	NA	NA	NA	NA	1.11769	1
LIN37	NA	NA	NA	NA	NA	NA	NA	1.11514	1
NFKB1	NA	NA	NA	NA	NA	NA	NA	1.11397	1
TGFB1	NA	NA	2.0342	2.60247	NA	NA	NA	1.1123	3
TNFRSF10A	NA	NA	NA	0.972317	NA	NA	NA	1.1118	2
TUBB6	NA	NA	NA	NA	NA	NA	1.52187	1.111	2
FAM189A2	NA	NA	NA	NA	NA	NA	NA	1.11075	1
ZNF267	NA	NA	NA	NA	NA	NA	1.33954	1.11069	2
RPS28	NA	NA	NA	NA	NA	NA	NA	1.11044	1
SHB	NA	NA	NA	NA	NA	NA	NA	1.10989	1
TMTC1	NA	NA	NA	2.19251	NA	1.1114	NA	1.10909	3
SYNJ2	NA	NA	NA	NA	NA	NA	1.02467	1.10374	2
CAPNS1	NA	NA	NA	1.22131	NA	1.04241	1.09143	1.10072	4
JADE2	NA	NA	NA	NA	NA	NA	NA	1.09937	1
HIVEP1	NA	NA	NA	NA	NA	NA	0.8735	1.09771	2
LOC100506098	NA	NA	NA	NA	NA	NA	NA	1.09752	1
PSMB8	NA	NA	NA	NA	NA	NA	NA	1.09688	1
KCNQ5-IT1	NA	NA	NA	NA	NA	NA	NA	1.09643	1
ECM1	NA	NA	NA	1.26252	NA	NA	2.20764	1.0956	3
TMEM51	NA	NA	NA	NA	NA	NA	0.954031	1.09494	2
SEMA7A	NA	NA	NA	NA	NA	NA	NA	1.0946	1
ICAM2	NA	NA	NA	NA	NA	NA	1.14609	1.09441	2
PRICKLE3	NA	NA	NA	1.44444	NA	NA	NA	1.09053	2
PROCR	NA	NA	NA	NA	NA	NA	NA	1.08892	1
LURAP1L-AS1	NA	NA	NA	NA	NA	NA	NA	1.08854	1
FAM95B1	NA	NA	NA	NA	NA	NA	1.08391	1.08729	2
PLSCR1	NA	NA	NA	NA	NA	NA	0.710258	1.08694	2
FRMD4B	NA	NA	NA	NA	NA	NA	2.03598	1.0863	2
LY6E	NA	NA	NA	NA	NA	NA	NA	1.08584	1
SOAT1	NA	NA	NA	NA	NA	NA	NA	1.08531	1
CCDC86	NA	NA	NA	NA	NA	NA	NA	1.08322	1
ARHGAP31	NA	NA	1.45529	2.50083	NA	NA	1.40795	1.08154	4
SLC1A5	NA	NA	NA	NA	NA	NA	NA	1.08148	1
IFI16	NA	4.38744	5.35851	6.22092	NA	NA	NA	1.08029	4
MALT1	NA	NA	NA	NA	NA	NA	1.23243	1.07867	2
SHC1	NA	NA	1.14893	1.70292	NA	NA	1.5459	1.07837	4
SIGMAR1	NA	NA	NA	NA	NA	NA	NA	1.07752	1
RNF144B	NA	NA	NA	NA	NA	NA	0.958998	1.07721	2
LINC02029	NA	NA	NA	NA	NA	NA	NA	1.07676	1
PRAF2	NA	NA	NA	NA	NA	NA	NA	1.07515	1
GSN	NA	NA	NA	NA	NA	NA	NA	1.072	1
B3GNT9	NA	NA	NA	NA	NA	NA	NA	1.07142	1
TGIF1	NA	NA	NA	0.965977	NA	NA	NA	1.06729	2
FAM160A1	NA	NA	NA	1.38052	NA	NA	NA	1.06573	2
CDC42EP2	NA	NA	NA	NA	NA	NA	NA	1.06488	1
MAP4	NA	NA	NA	NA	NA	NA	NA	1.06414	1
GMPR	NA	NA	NA	NA	NA	NA	1.90658	1.06413	2
2010-09-01	NA	NA	NA	NA	NA	NA	1.27528	1.06313	2
LOC101930665	NA	NA	NA	NA	NA	NA	NA	1.0631	1
BCL9L	NA	NA	NA	0.778061	NA	NA	0.945692	1.06279	3
ZNF525	NA	NA	NA	NA	NA	NA	NA	1.06084	1
COLGALT1	NA	NA	NA	NA	NA	NA	NA	1.06067	1
IER3-AS1	NA	NA	NA	1.83549	NA	NA	1.16929	1.0603	3
SPATA2	NA	NA	NA	1.28706	NA	NA	NA	1.05921	2
TMEM109	NA	NA	NA	NA	NA	NA	NA	1.05882	1
LPCAT2	NA	NA	NA	NA	NA	NA	NA	1.05877	1
EFNA5	NA	NA	1.39459	1.66519	NA	NA	NA	1.0572	3
PERP	NA	NA	NA	NA	NA	NA	NA	1.05652	1
SNX7	NA	NA	NA	NA	NA	NA	NA	1.05594	1
CSMD2	NA	NA	NA	NA	NA	NA	NA	1.05513	1
STON2	NA	NA	NA	NA	NA	NA	1.03179	1.05438	2
LUCAT1	NA	NA	NA	1.62498	NA	NA	NA	1.05438	2
PXN	NA	NA	1.22675	2.44171	NA	NA	1.27134	1.05368	4
GALNT3	NA	NA	NA	NA	NA	NA	NA	1.05303	1
TAP1	NA	NA	NA	NA	NA	NA	NA	1.05237	1
ANO1	NA	NA	NA	NA	NA	NA	NA	1.05104	1
CNTNAP1	NA	NA	NA	NA	NA	NA	NA	1.05021	1
NCR3LG1	NA	NA	NA	NA	NA	NA	0.836284	1.04994	2
RPL13P5	NA	NA	1.25958	1.3921	NA	NA	NA	1.04859	3
SPP1	NA	NA	NA	NA	NA	NA	NA	1.04823	1
LAMP3	NA	NA	NA	NA	NA	NA	NA	1.04804	1
RIN3	NA	NA	NA	NA	NA	NA	NA	1.04789	1
CLDN7	NA	NA	NA	NA	NA	NA	NA	1.04752	1
LRRTM1	NA	NA	NA	NA	NA	NA	NA	1.0462	1
CPNE2	NA	NA	NA	1.74535	NA	NA	1.74975	1.0459	3
GPR158	NA	NA	NA	NA	NA	NA	NA	1.04473	1
SLC10A3	NA	NA	NA	NA	NA	NA	NA	1.04387	1
KCNN3	NA	NA	NA	NA	NA	NA	1.01973	1.04286	2
MUC1	NA	NA	NA	NA	NA	NA	NA	1.03983	1
GYG1	NA	NA	NA	NA	NA	NA	NA	1.03983	1
EIF5A2	NA	NA	NA	1.15481	NA	NA	NA	1.0398	2
CD58	NA	NA	NA	NA	NA	NA	0.806284	1.03954	2
LUZP1	NA	NA	NA	NA	NA	NA	NA	1.03938	1
KIF1C	NA	NA	NA	NA	NA	NA	NA	1.03643	1
CYB561	NA	NA	NA	NA	NA	NA	NA	1.03522	1
RELA	NA	NA	NA	NA	NA	NA	NA	1.03419	1
RAET1K	NA	NA	NA	NA	NA	NA	NA	1.03257	1
PRKACB	NA	NA	NA	NA	NA	NA	1.37439	1.03218	2
NMI	NA	NA	NA	1.64369	NA	NA	NA	1.03053	2
ENDOD1	NA	NA	NA	1.43603	NA	NA	NA	1.02959	2
LOC101928381	NA	NA	NA	NA	NA	NA	NA	1.02685	1
JAK2	NA	NA	NA	NA	NA	NA	0.981533	1.02445	2
LOC101927377	NA	NA	NA	NA	NA	NA	NA	1.02347	1
NRIP1	NA	NA	NA	NA	NA	NA	1.17307	1.02272	2
FHOD1	NA	NA	NA	NA	NA	NA	1.15274	1.01925	2
AKIRIN2	NA	NA	NA	0.847976	NA	NA	NA	1.01647	2
EPHA7	NA	NA	NA	NA	NA	NA	1.16702	1.01646	2
RREB1	NA	NA	NA	NA	NA	NA	1.53322	1.01607	2
TRIM56	NA	NA	NA	0.948394	NA	NA	1.03916	1.0153	3
FRMD3	NA	NA	NA	NA	NA	NA	0.950386	1.01414	2
LOC105369617	NA	NA	NA	NA	NA	NA	NA	1.01371	1
PRKCSH	NA	NA	NA	NA	NA	NA	NA	1.01365	1
LINC00941	NA	NA	NA	NA	NA	NA	1.15866	1.0136	2
CTSA	NA	NA	NA	NA	NA	NA	NA	1.01286	1
APOL2	NA	NA	NA	NA	NA	NA	NA	1.01152	1
LOC102724351	NA	NA	NA	NA	NA	NA	NA	1.01013	1
RALGPS2	NA	NA	NA	1.04738	NA	NA	NA	1.00999	2
FAM114A1	NA	NA	NA	1.90755	NA	NA	NA	1.00977	2
CHERP	NA	NA	NA	NA	NA	NA	NA	1.00885	1
RIPOR1	NA	NA	NA	NA	NA	NA	NA	1.0083	1
DUSP14	NA	NA	NA	NA	NA	NA	0.771202	1.00785	2
PEG10	NA	NA	1.89213	2.37692	NA	NA	NA	1.00559	3
TSPAN9	NA	NA	NA	NA	NA	NA	1.40906	1.00558	2
CAP1	NA	NA	NA	NA	NA	NA	NA	1.00363	1
SLC24A3	NA	NA	NA	NA	1.62543	1.17659	1.8503	1.00281	4
PDZRN3	NA	NA	NA	NA	NA	NA	NA	1.002	1
ARHGEF6	NA	NA	NA	1.79637	NA	NA	NA	1.00186	2
COG7	NA	NA	NA	NA	NA	NA	NA	1.00167	1
ARHGEF3	NA	NA	NA	NA	NA	NA	1.36162	1.00154	2
MCAM	NA	NA	NA	NA	NA	NA	NA	1.00126	1
KDELR1	NA	NA	NA	NA	NA	NA	NA	1.00109	1
SWAP70	NA	NA	NA	NA	NA	NA	NA	0.998025	1
MYH9	NA	NA	NA	1.61603	NA	NA	1.11849	0.995979	3
CDC14A	NA	NA	NA	NA	NA	NA	NA	0.995098	1
PROSER3	NA	NA	NA	1.21307	NA	NA	NA	0.995017	2
MYO1E	NA	NA	NA	0.90199	NA	NA	NA	0.994223	2
NECTIN2	NA	NA	NA	1.6588	NA	NA	NA	0.994104	2
PLD5	NA	NA	NA	NA	NA	NA	NA	0.993609	1
VWA5A	NA	NA	NA	1.23105	NA	NA	NA	0.992978	2
SERPINB1	NA	NA	NA	NA	NA	NA	NA	0.991574	1
VRK3	NA	NA	NA	NA	NA	NA	NA	0.991209	1
RAB3B	NA	NA	NA	1.03739	NA	NA	NA	0.989724	2
FOXO1	NA	NA	NA	NA	NA	NA	NA	0.988264	1
TNFAIP1	NA	NA	NA	1.07206	NA	NA	NA	0.987317	2
MISP3	NA	NA	NA	NA	NA	NA	NA	0.987077	1
NOP2	NA	NA	NA	NA	NA	NA	0.953385	0.986979	2
RGS17	NA	NA	NA	NA	NA	NA	1.41529	0.986676	2
EPB41L3	NA	NA	NA	NA	NA	NA	NA	0.985238	1
RAPH1	NA	NA	NA	NA	NA	NA	0.933033	0.983528	2
DCDC2	NA	NA	NA	NA	NA	NA	NA	0.983267	1
MIDN	NA	NA	NA	1.33234	NA	NA	NA	0.982918	2
COL4A1	NA	NA	NA	NA	NA	NA	1.11881	0.982075	2
PPP1R3B	NA	NA	NA	NA	NA	NA	NA	0.981918	1
BACE2	NA	NA	NA	NA	NA	NA	NA	0.980824	1
SYN1	NA	NA	1.26992	NA	NA	NA	NA	0.980611	2
CALU	NA	NA	NA	NA	NA	NA	0.884221	0.97988	2
TMEM214	NA	NA	NA	1.24432	NA	NA	0.958038	0.97843	3
MCF2L-AS1	NA	NA	NA	NA	NA	NA	NA	0.977719	1
SLC9A3	NA	NA	NA	NA	NA	NA	NA	0.976848	1
MARVELD1	NA	NA	NA	NA	NA	NA	NA	0.975996	1
ABCC6P2	NA	NA	NA	NA	NA	NA	NA	0.975553	1
TFPI	NA	NA	NA	2.54804	NA	NA	NA	0.97385	2
PFN1	NA	NA	NA	NA	NA	NA	1.193	0.973543	2
AKAP6	NA	NA	NA	NA	NA	NA	NA	0.972254	1
LOC102724046	NA	NA	NA	NA	NA	NA	1.03432	0.971541	2
CCDC97	NA	NA	NA	NA	NA	NA	NA	0.968118	1
PARD6A	NA	NA	NA	NA	NA	NA	NA	0.967555	1
DCBLD1	NA	NA	NA	NA	NA	NA	NA	0.966969	1
CHPF	NA	NA	NA	NA	NA	NA	NA	0.965602	1
GREM1	NA	NA	NA	NA	NA	NA	NA	0.965598	1
TCF7L2	NA	NA	NA	1.84761	NA	NA	NA	0.964437	2
MEF2D	NA	NA	1.28188	1.7583	NA	NA	NA	0.963351	3
TOB2	NA	NA	NA	NA	NA	NA	NA	0.96316	1
LDOC1	NA	NA	NA	NA	NA	NA	NA	0.962629	1
GALNT10	NA	NA	NA	NA	NA	NA	NA	0.962525	1
MAST4	NA	NA	NA	1.17261	NA	NA	NA	0.962327	2
EFR3A	NA	NA	NA	NA	NA	NA	0.824459	0.962006	2
SPAG1	NA	NA	NA	NA	NA	NA	NA	0.959871	1
CNIH3	NA	NA	NA	NA	NA	NA	1.10527	0.959733	2
ANXA5	NA	NA	NA	2.02954	NA	NA	NA	0.958906	2
MAP1LC3B	NA	NA	NA	NA	NA	NA	NA	0.958669	1
C12orf49	NA	NA	NA	NA	NA	NA	NA	0.956011	1
NRSN2	NA	NA	NA	NA	NA	NA	NA	0.955727	1
[truncated: 1,127 more rows]
