# Supplementary figures and images for: Extracellular signal-regulated kinase mediates chromatin rewiring and lineage transformation in lung cancer
Source: eLife journal article supplement (doi:10.7554/elife.66524), 2021-06-14

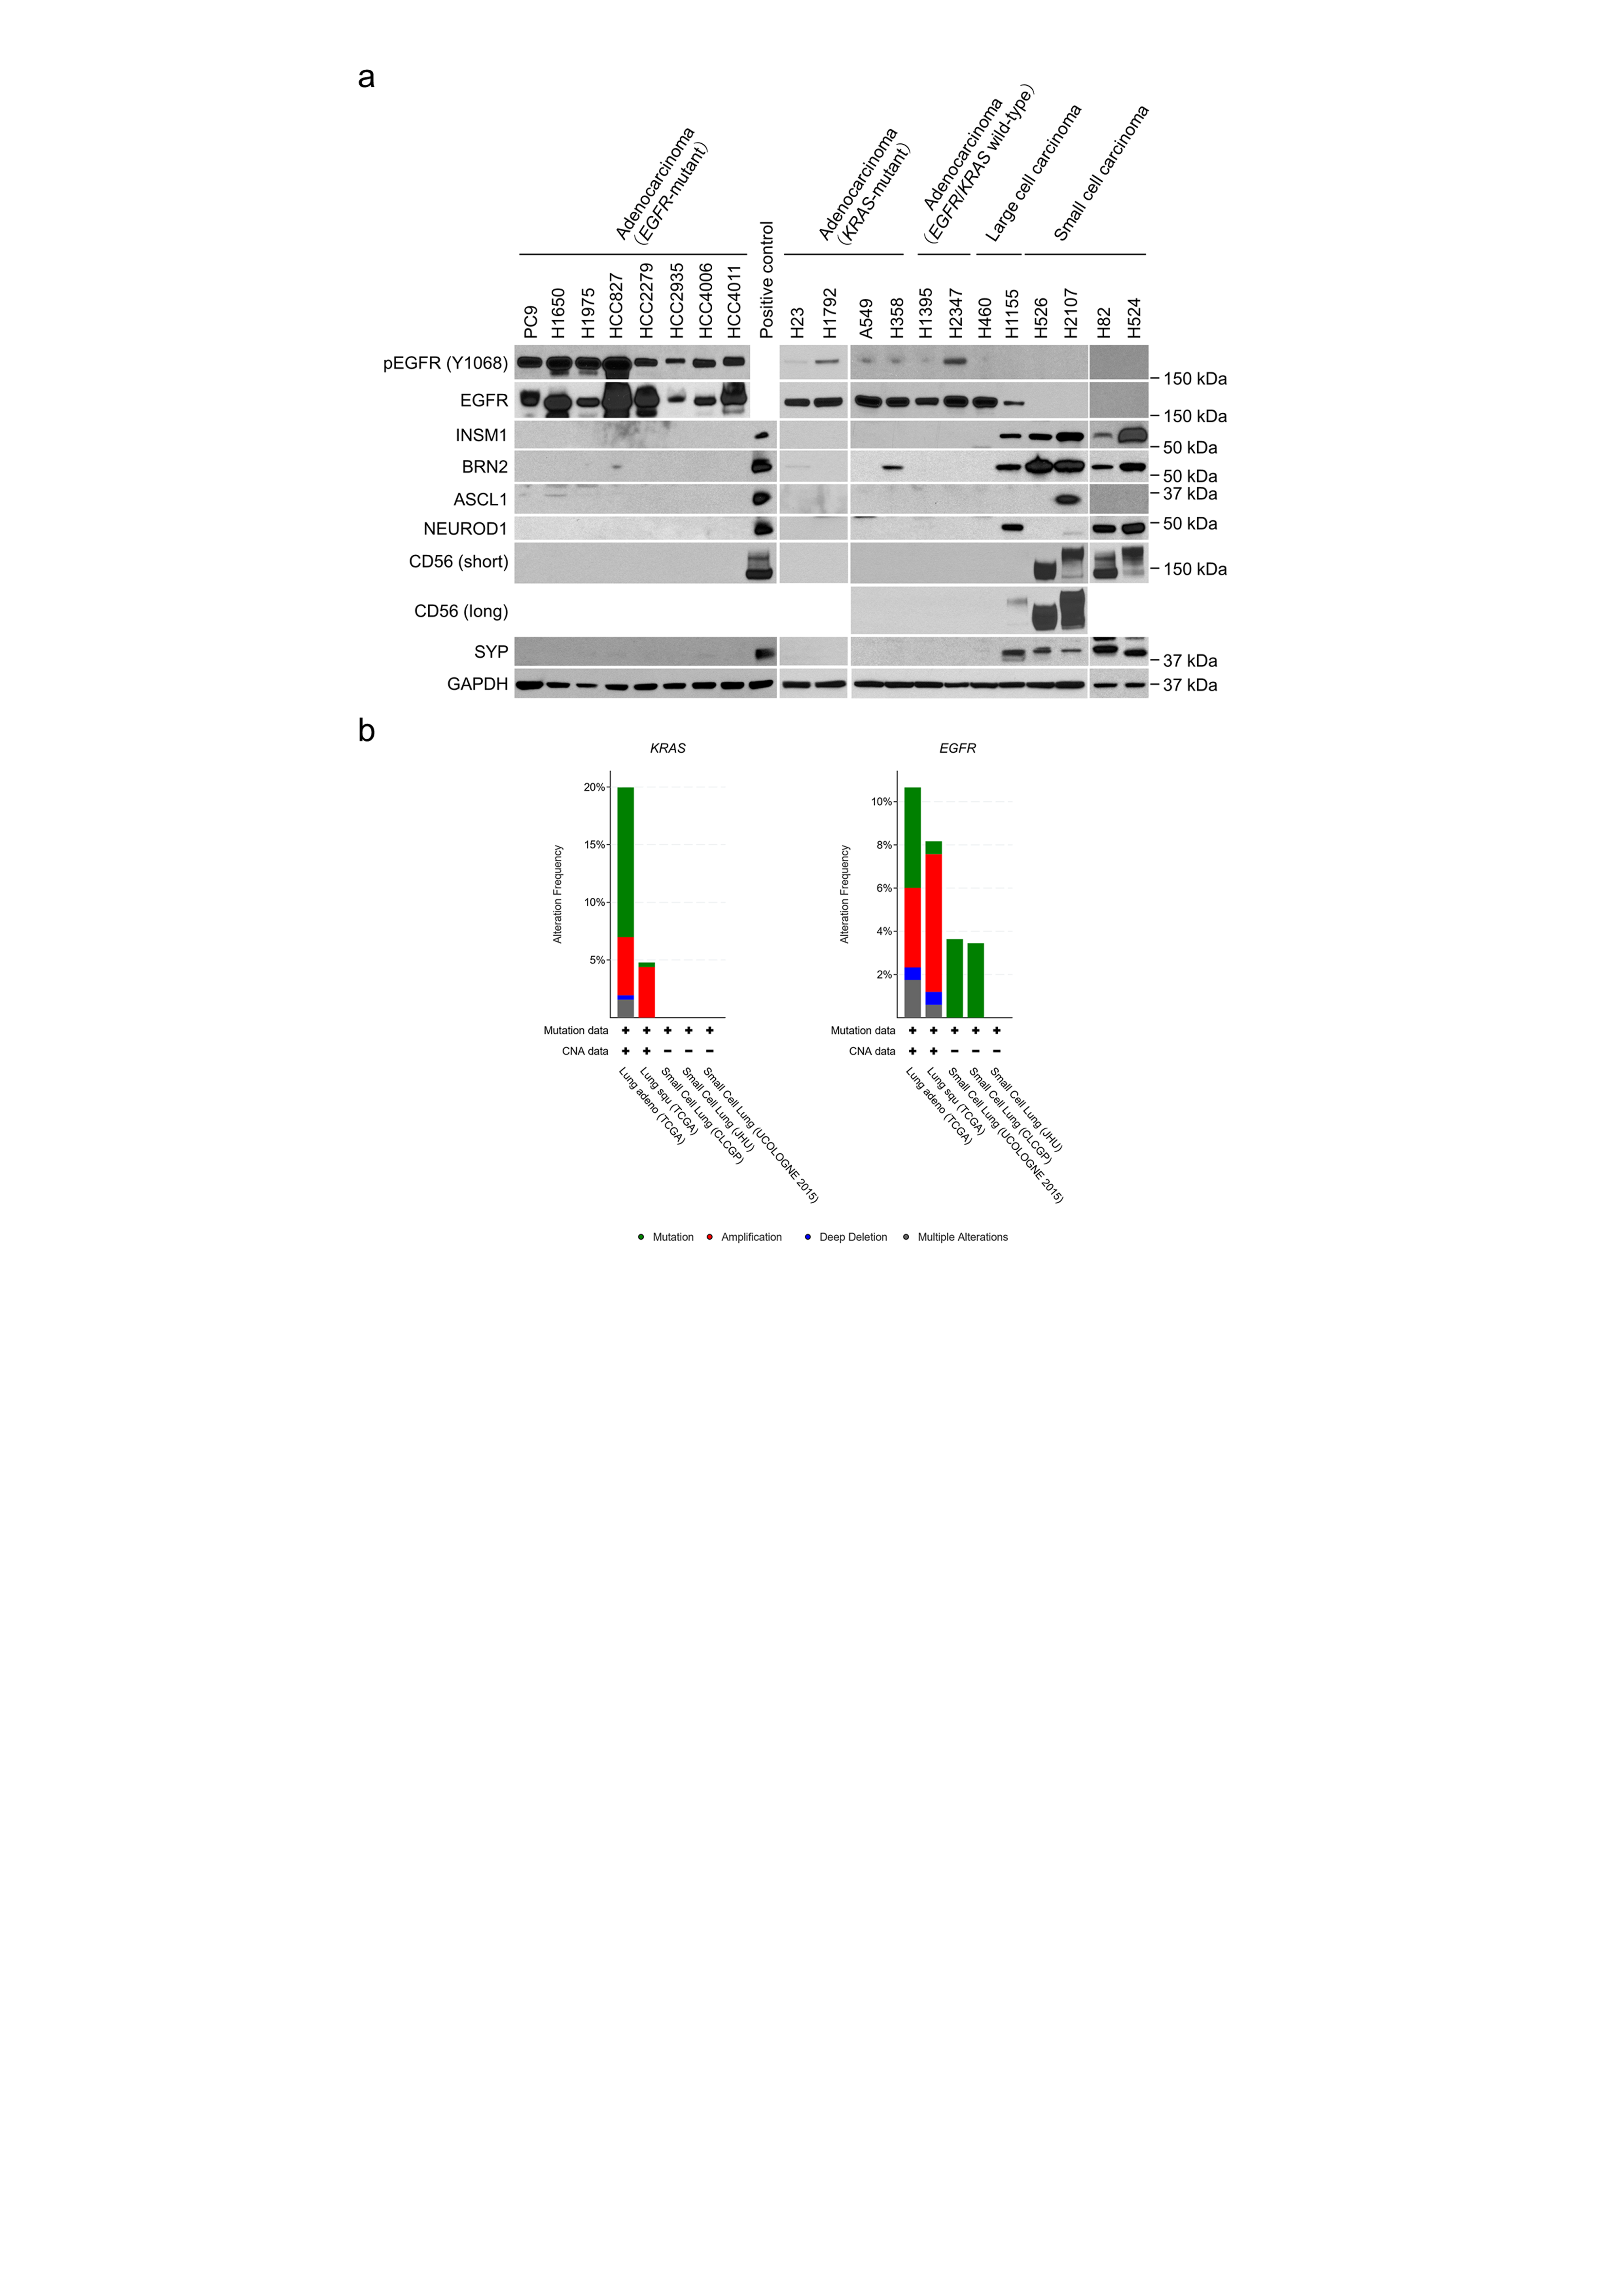

Supplement: supp [file elife-66524-supp-v1.zip › elife_poa_e66524_Figure_1_figure_supplement_1.tif]

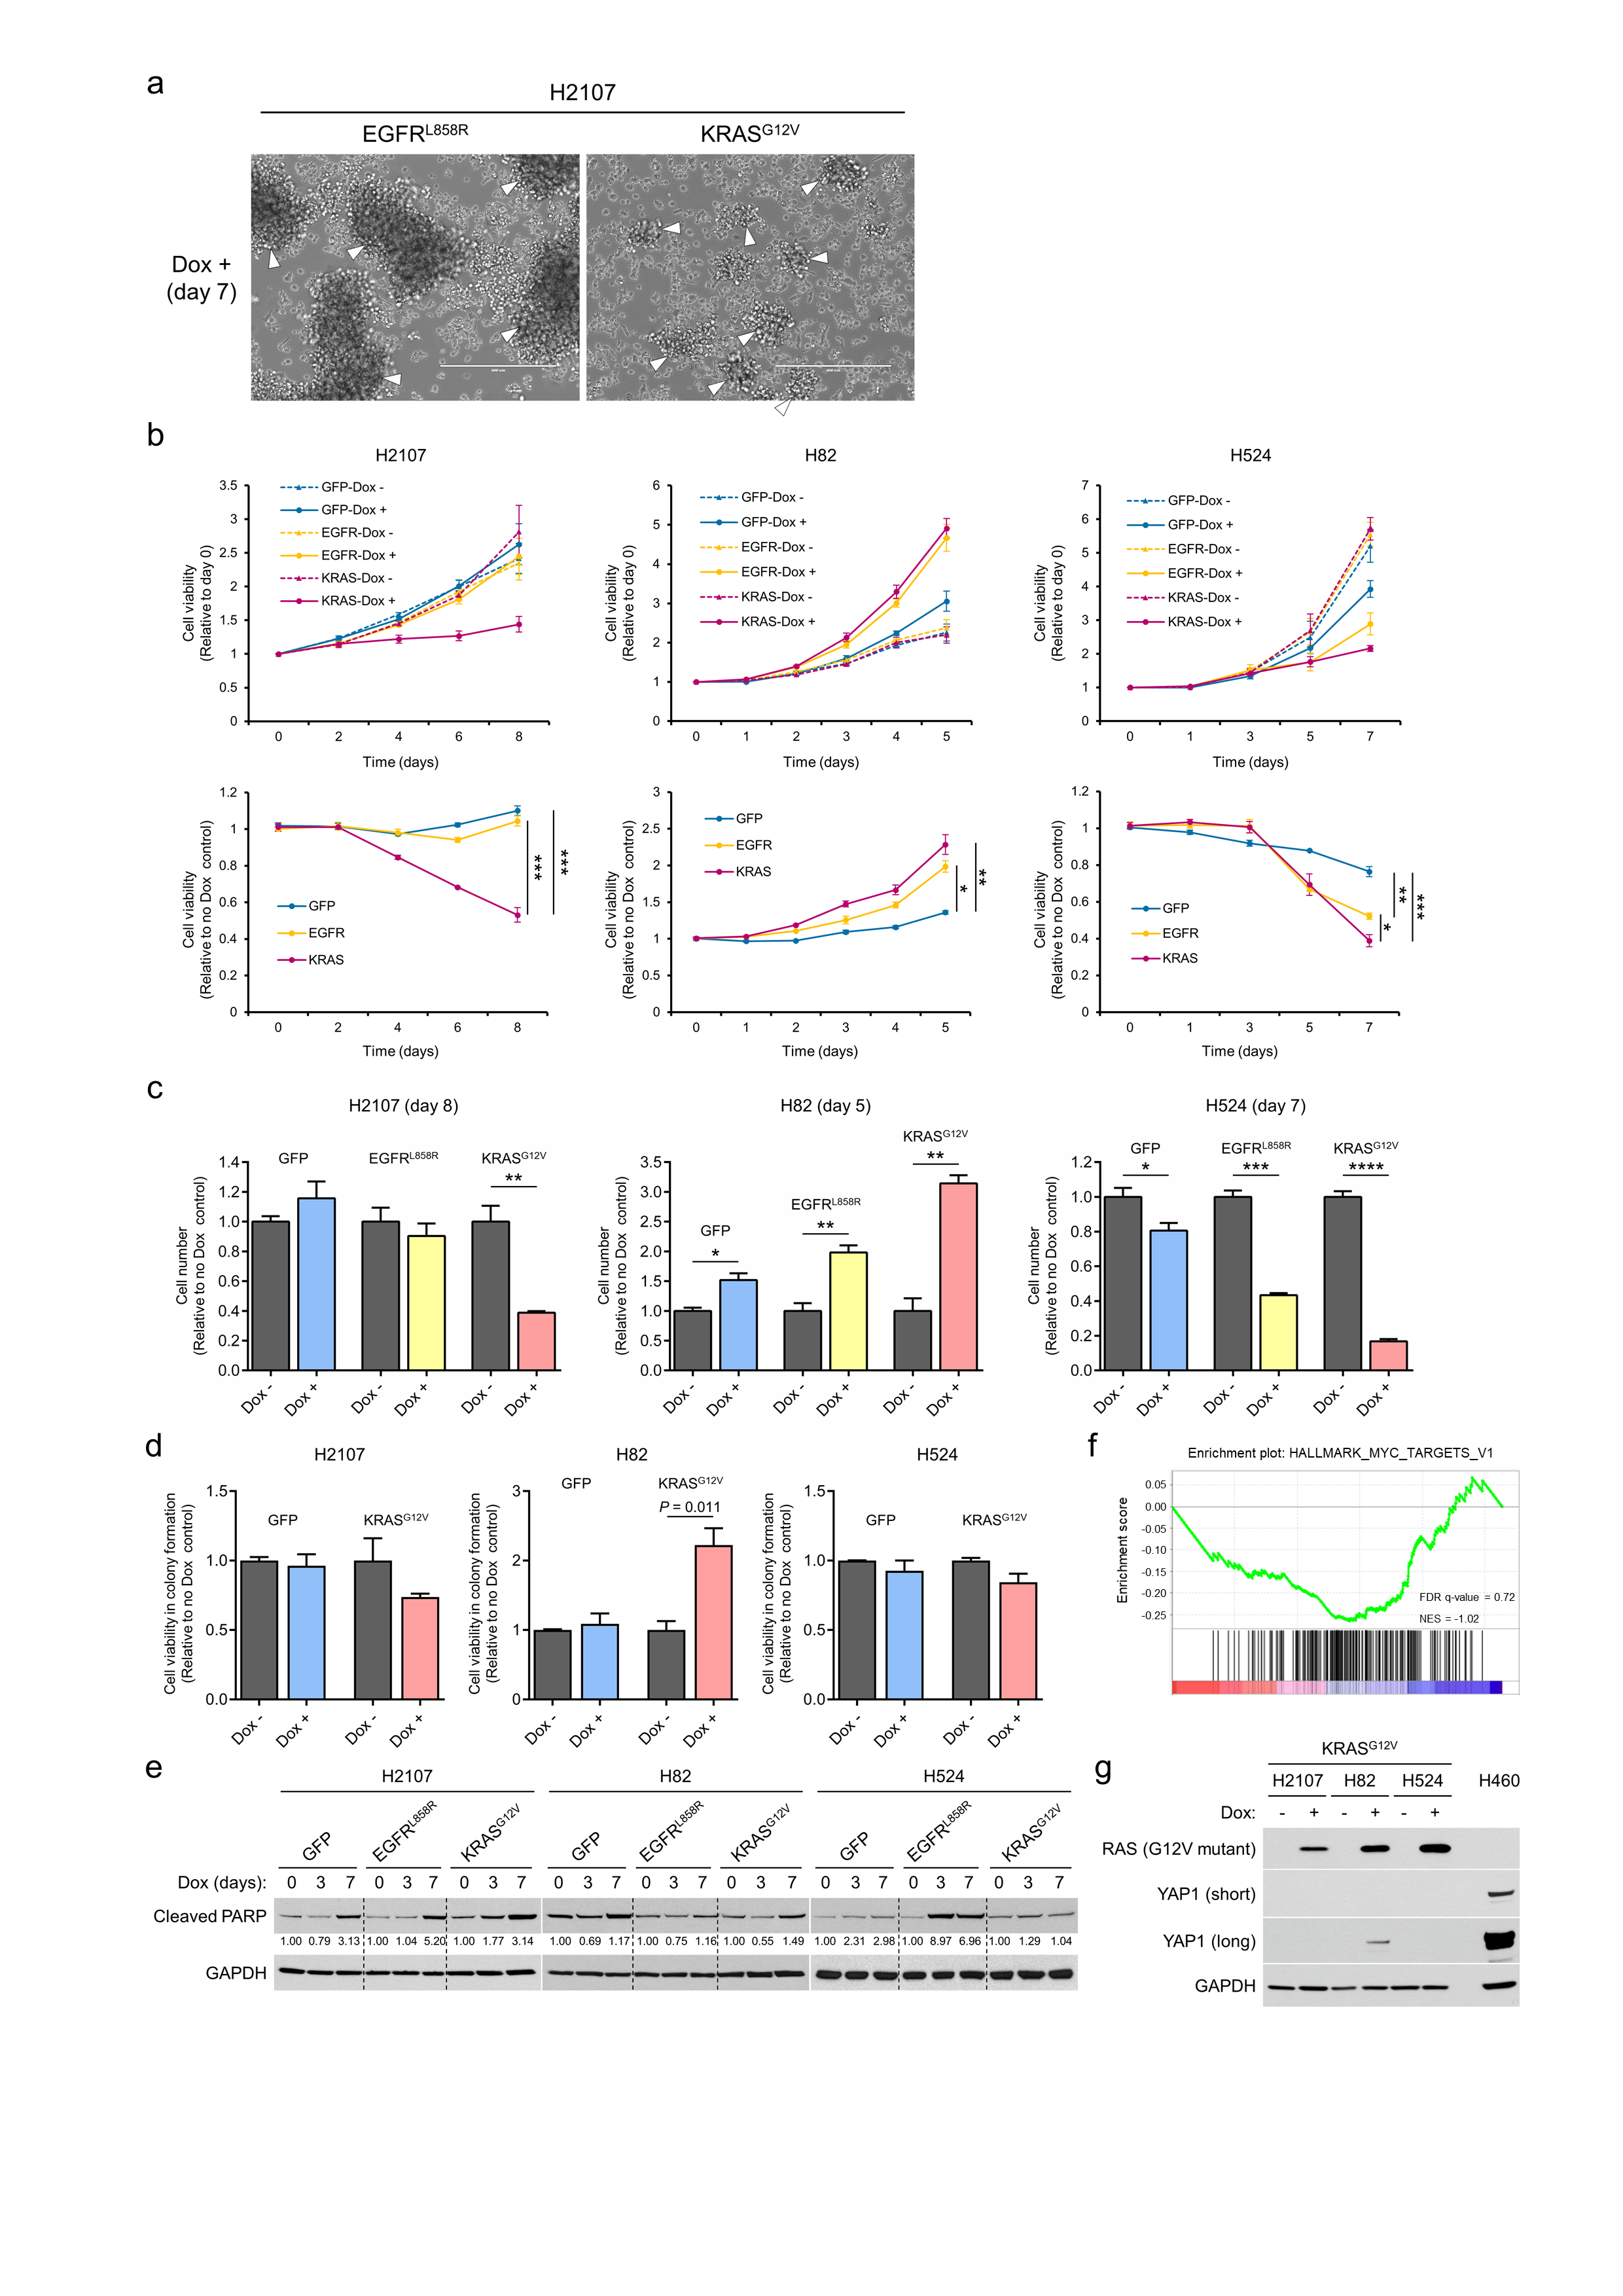

Supplement: supp [file elife-66524-supp-v1.zip › elife_poa_e66524_Figure_1_figure_supplement_2.tif]

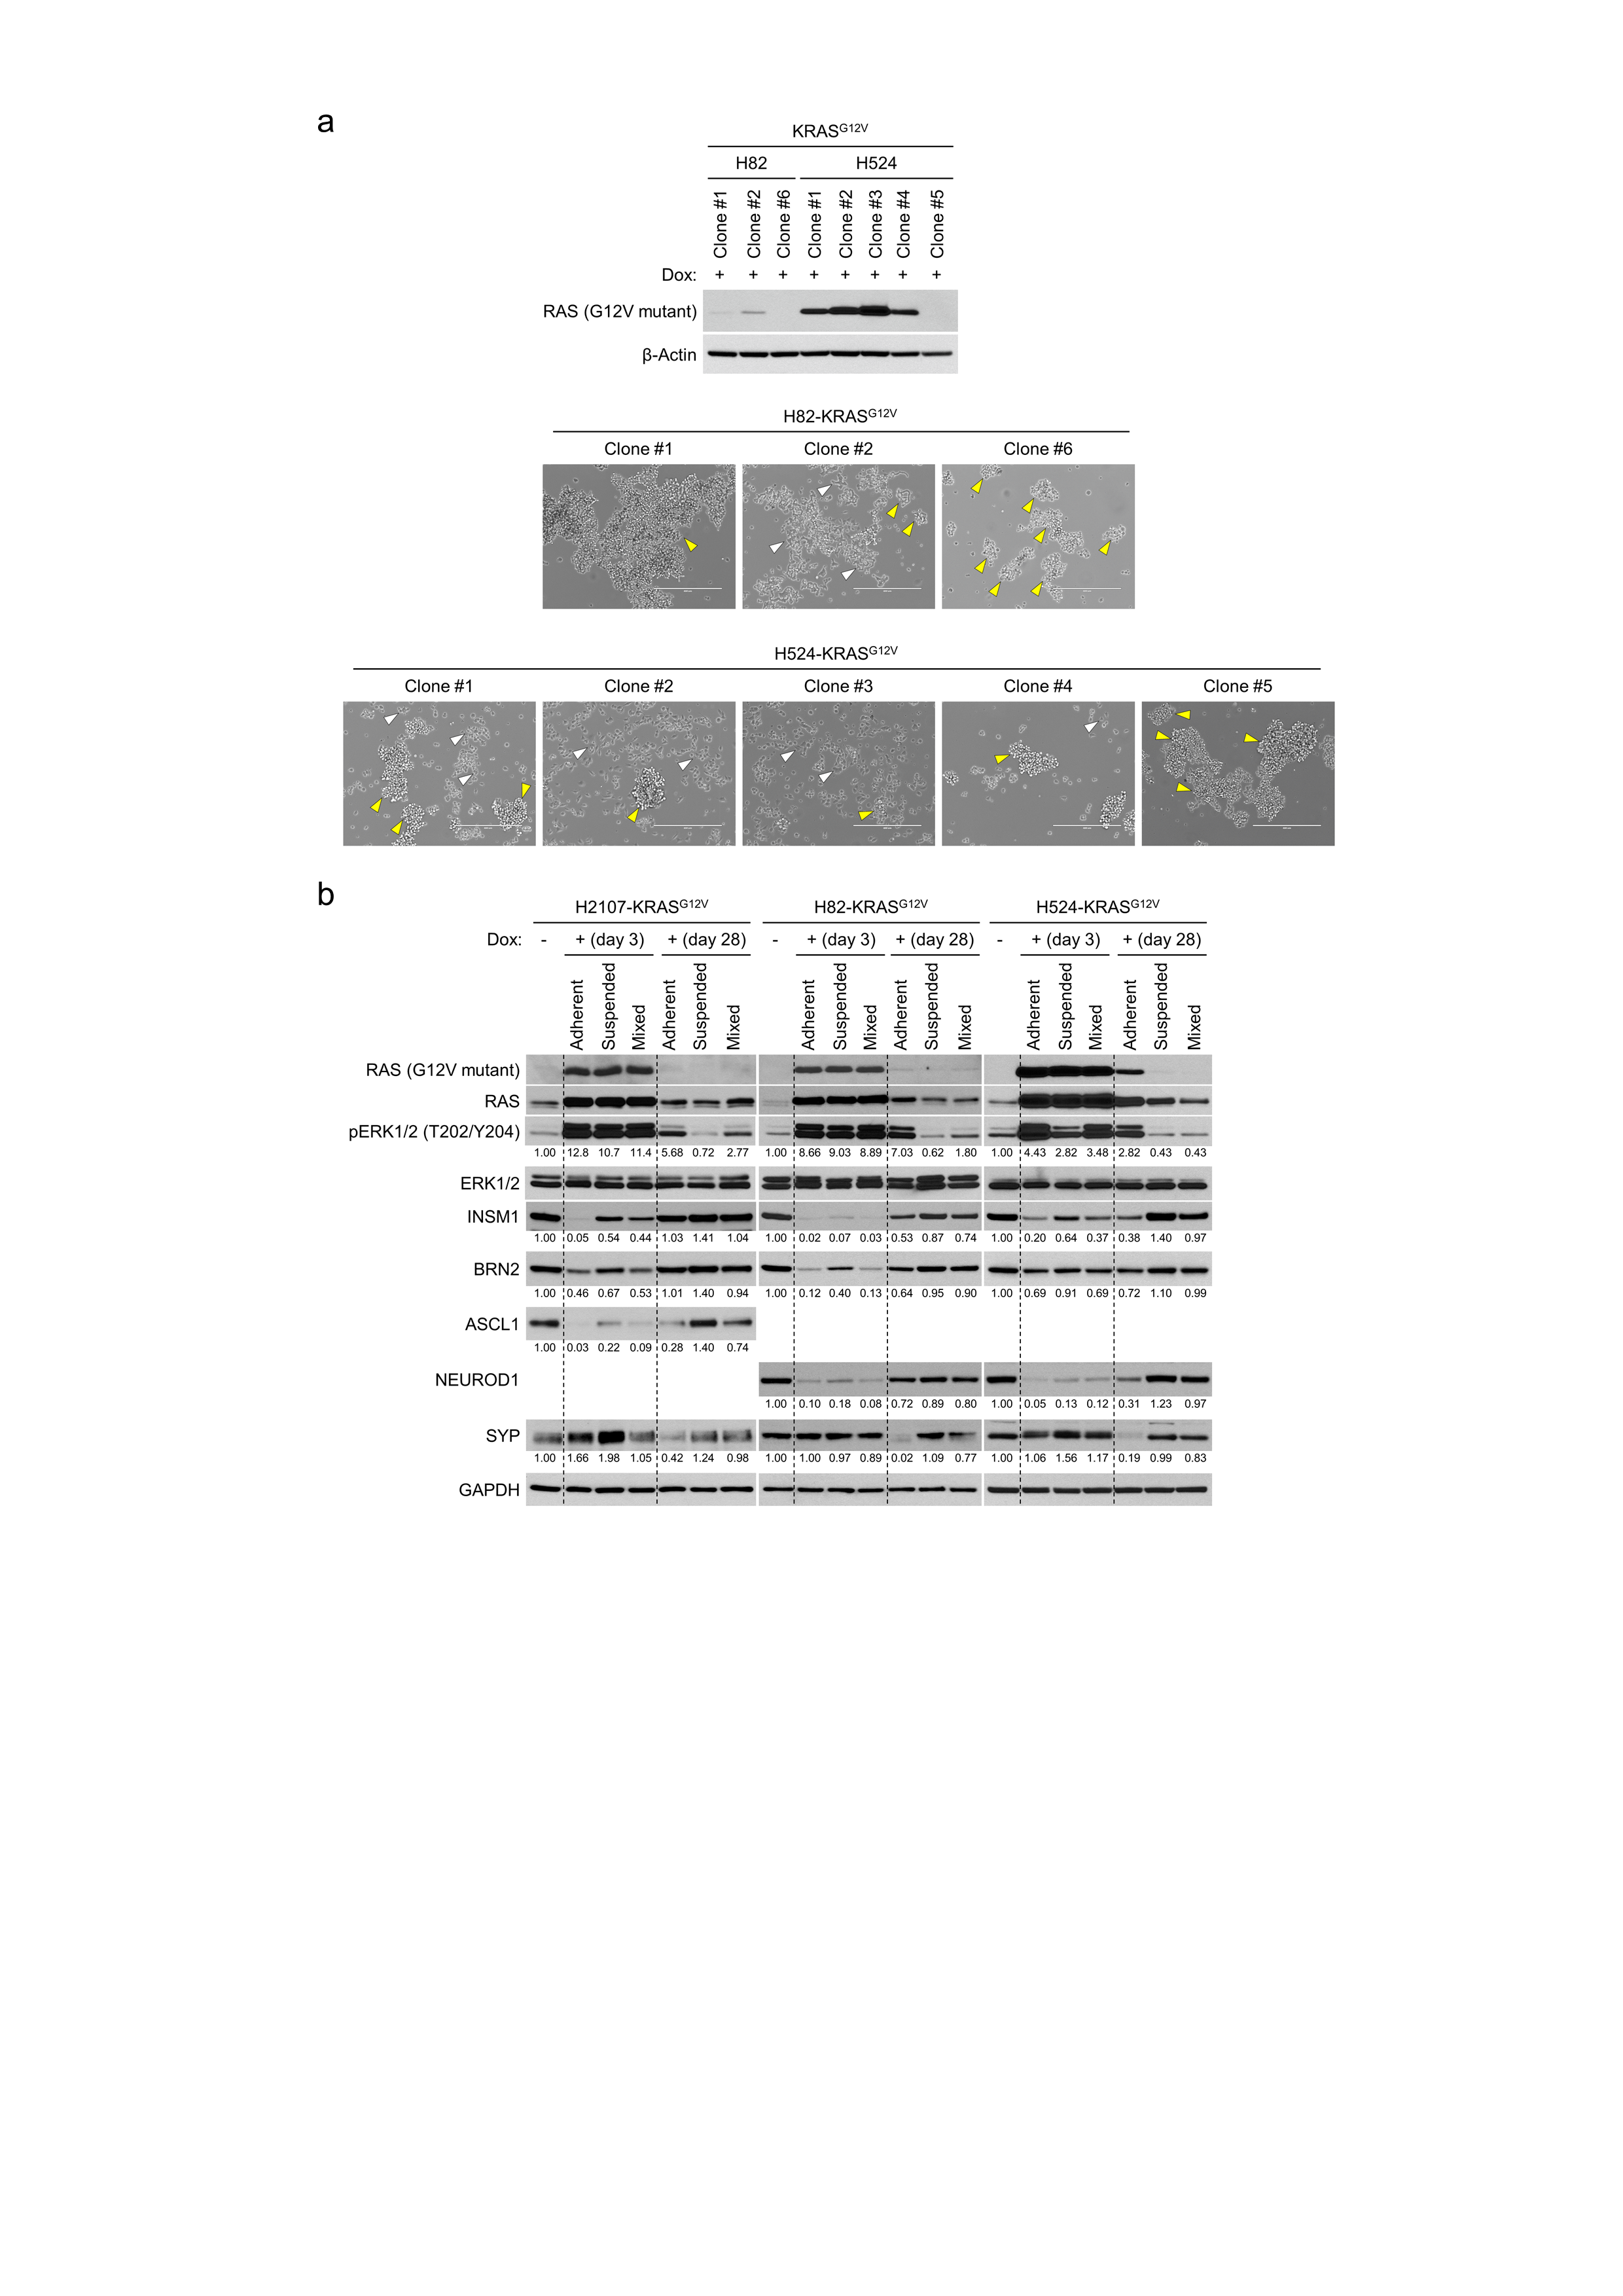

Supplement: supp [file elife-66524-supp-v1.zip › elife_poa_e66524_Figure_1_figure_supplement_3.tif]

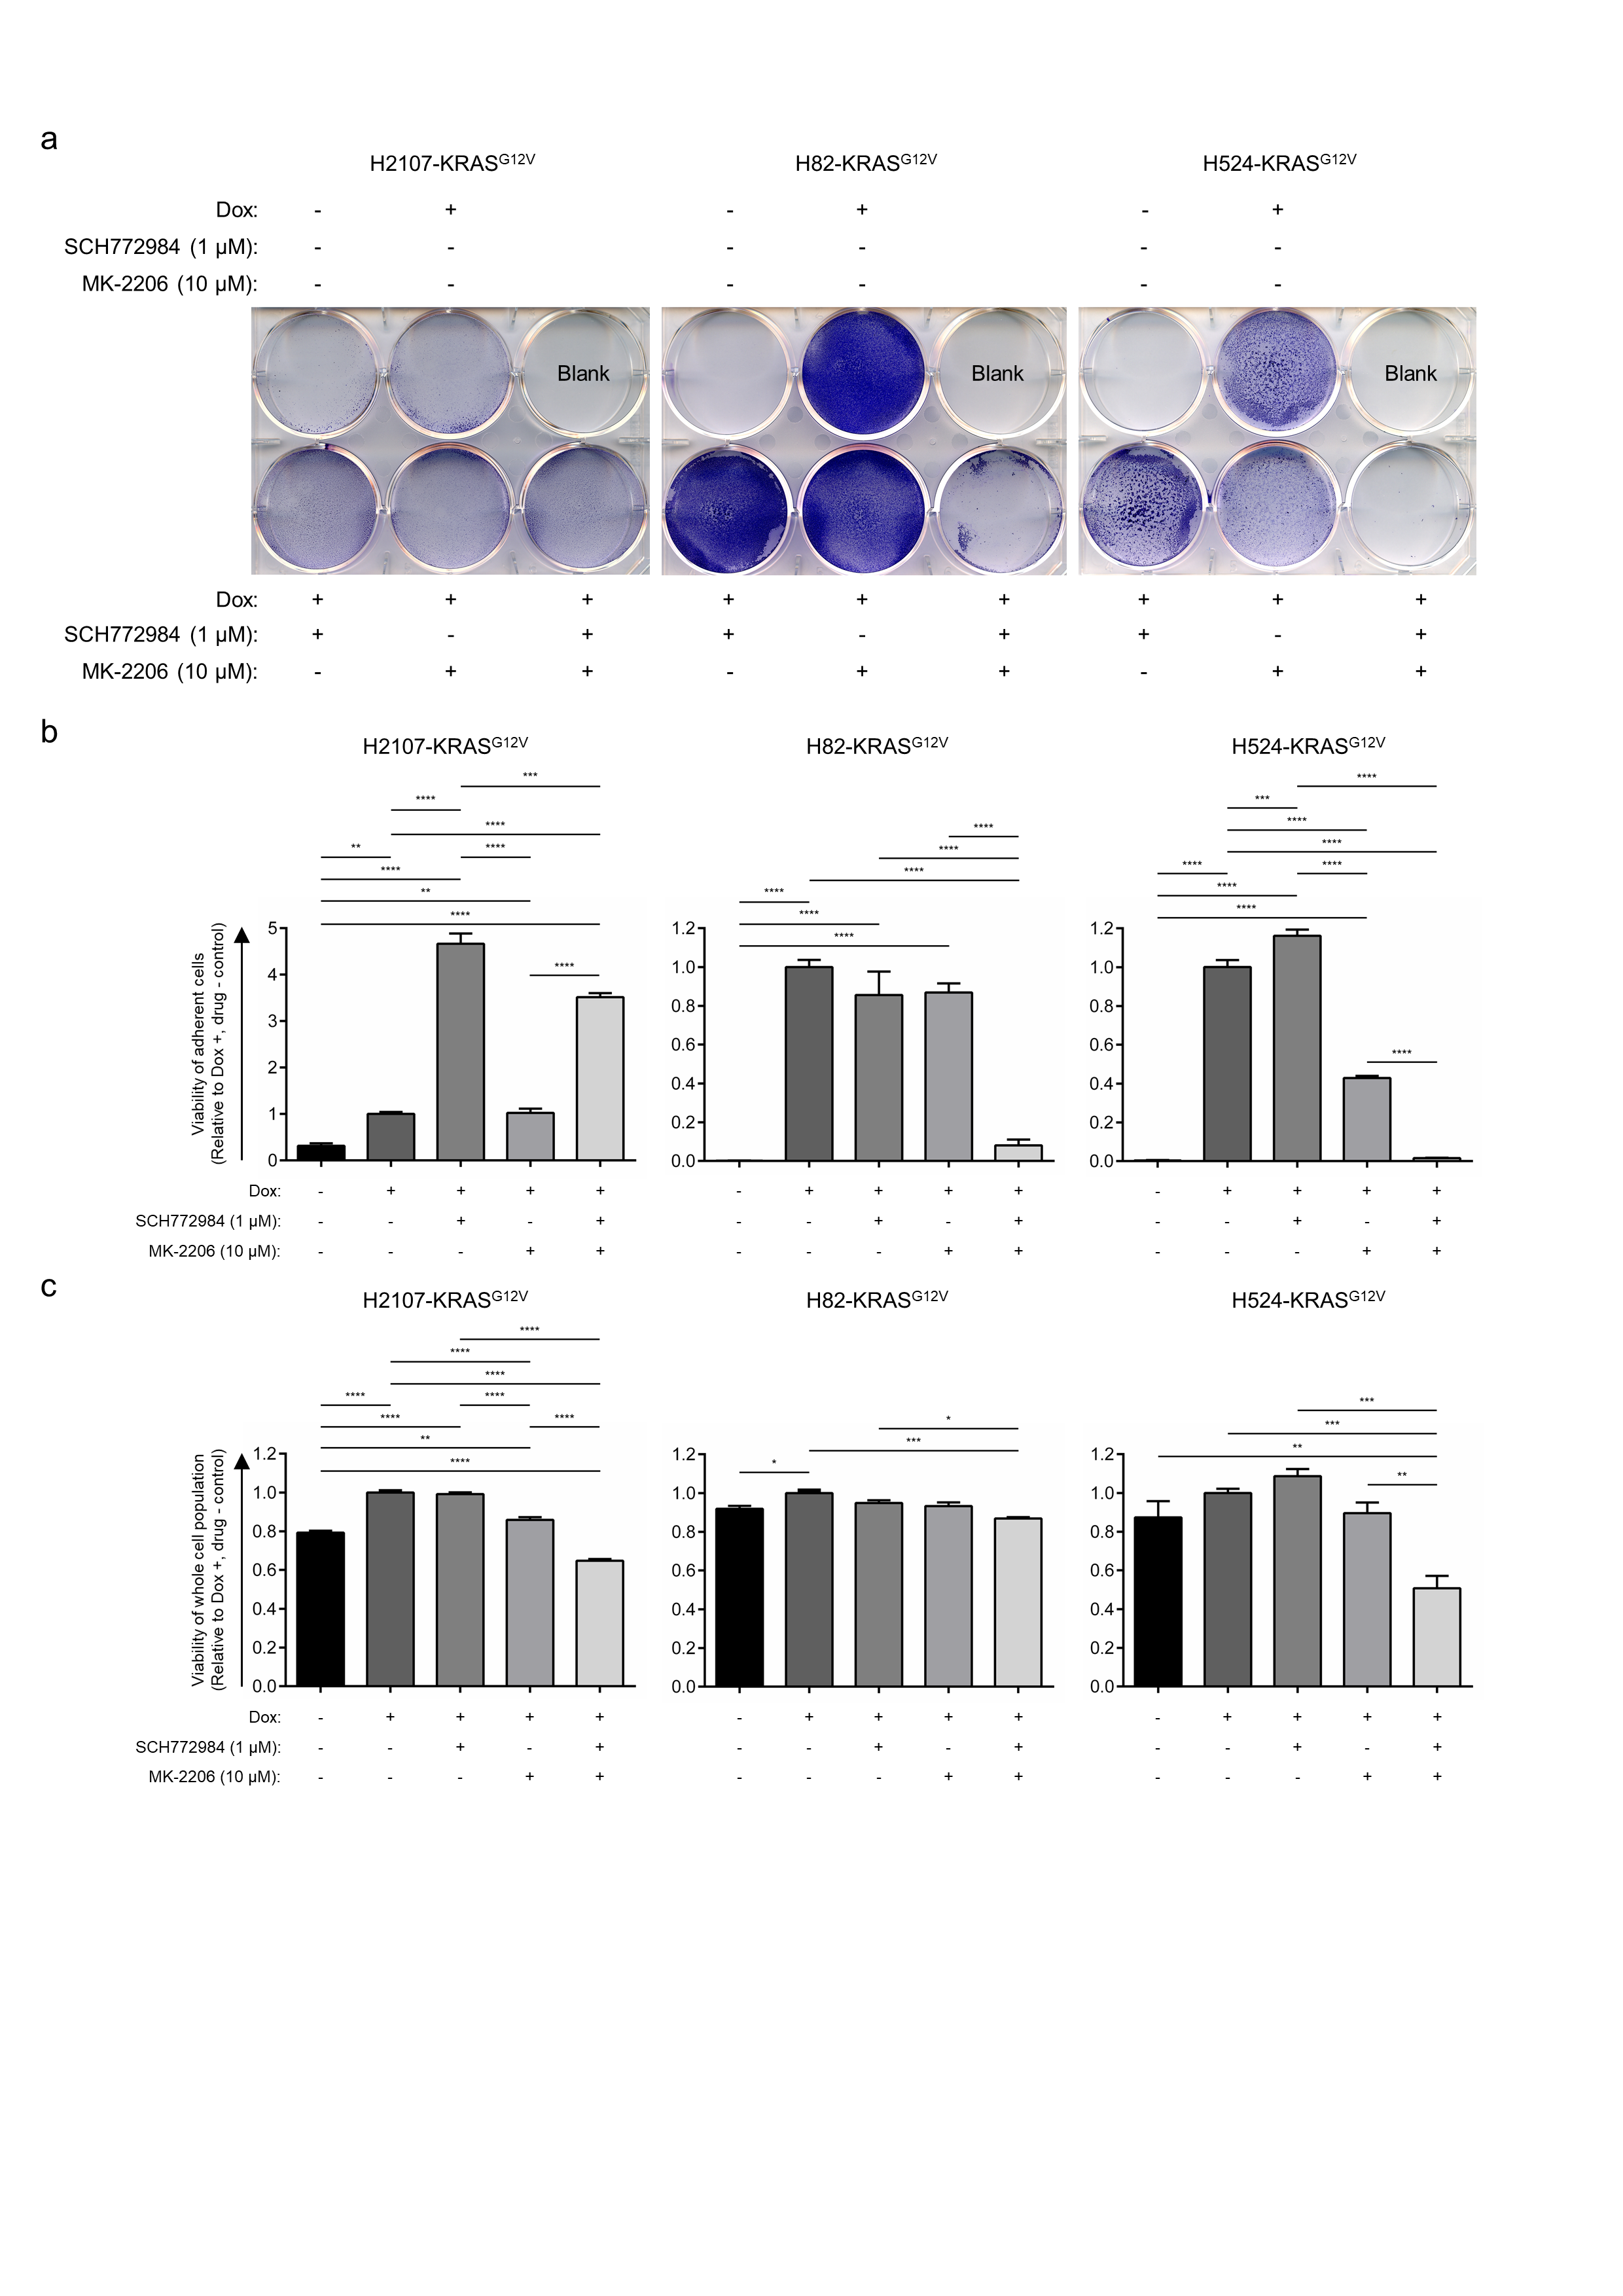

Supplement: supp [file elife-66524-supp-v1.zip › elife_poa_e66524_Figure_2_figure_supplement_1.tif]

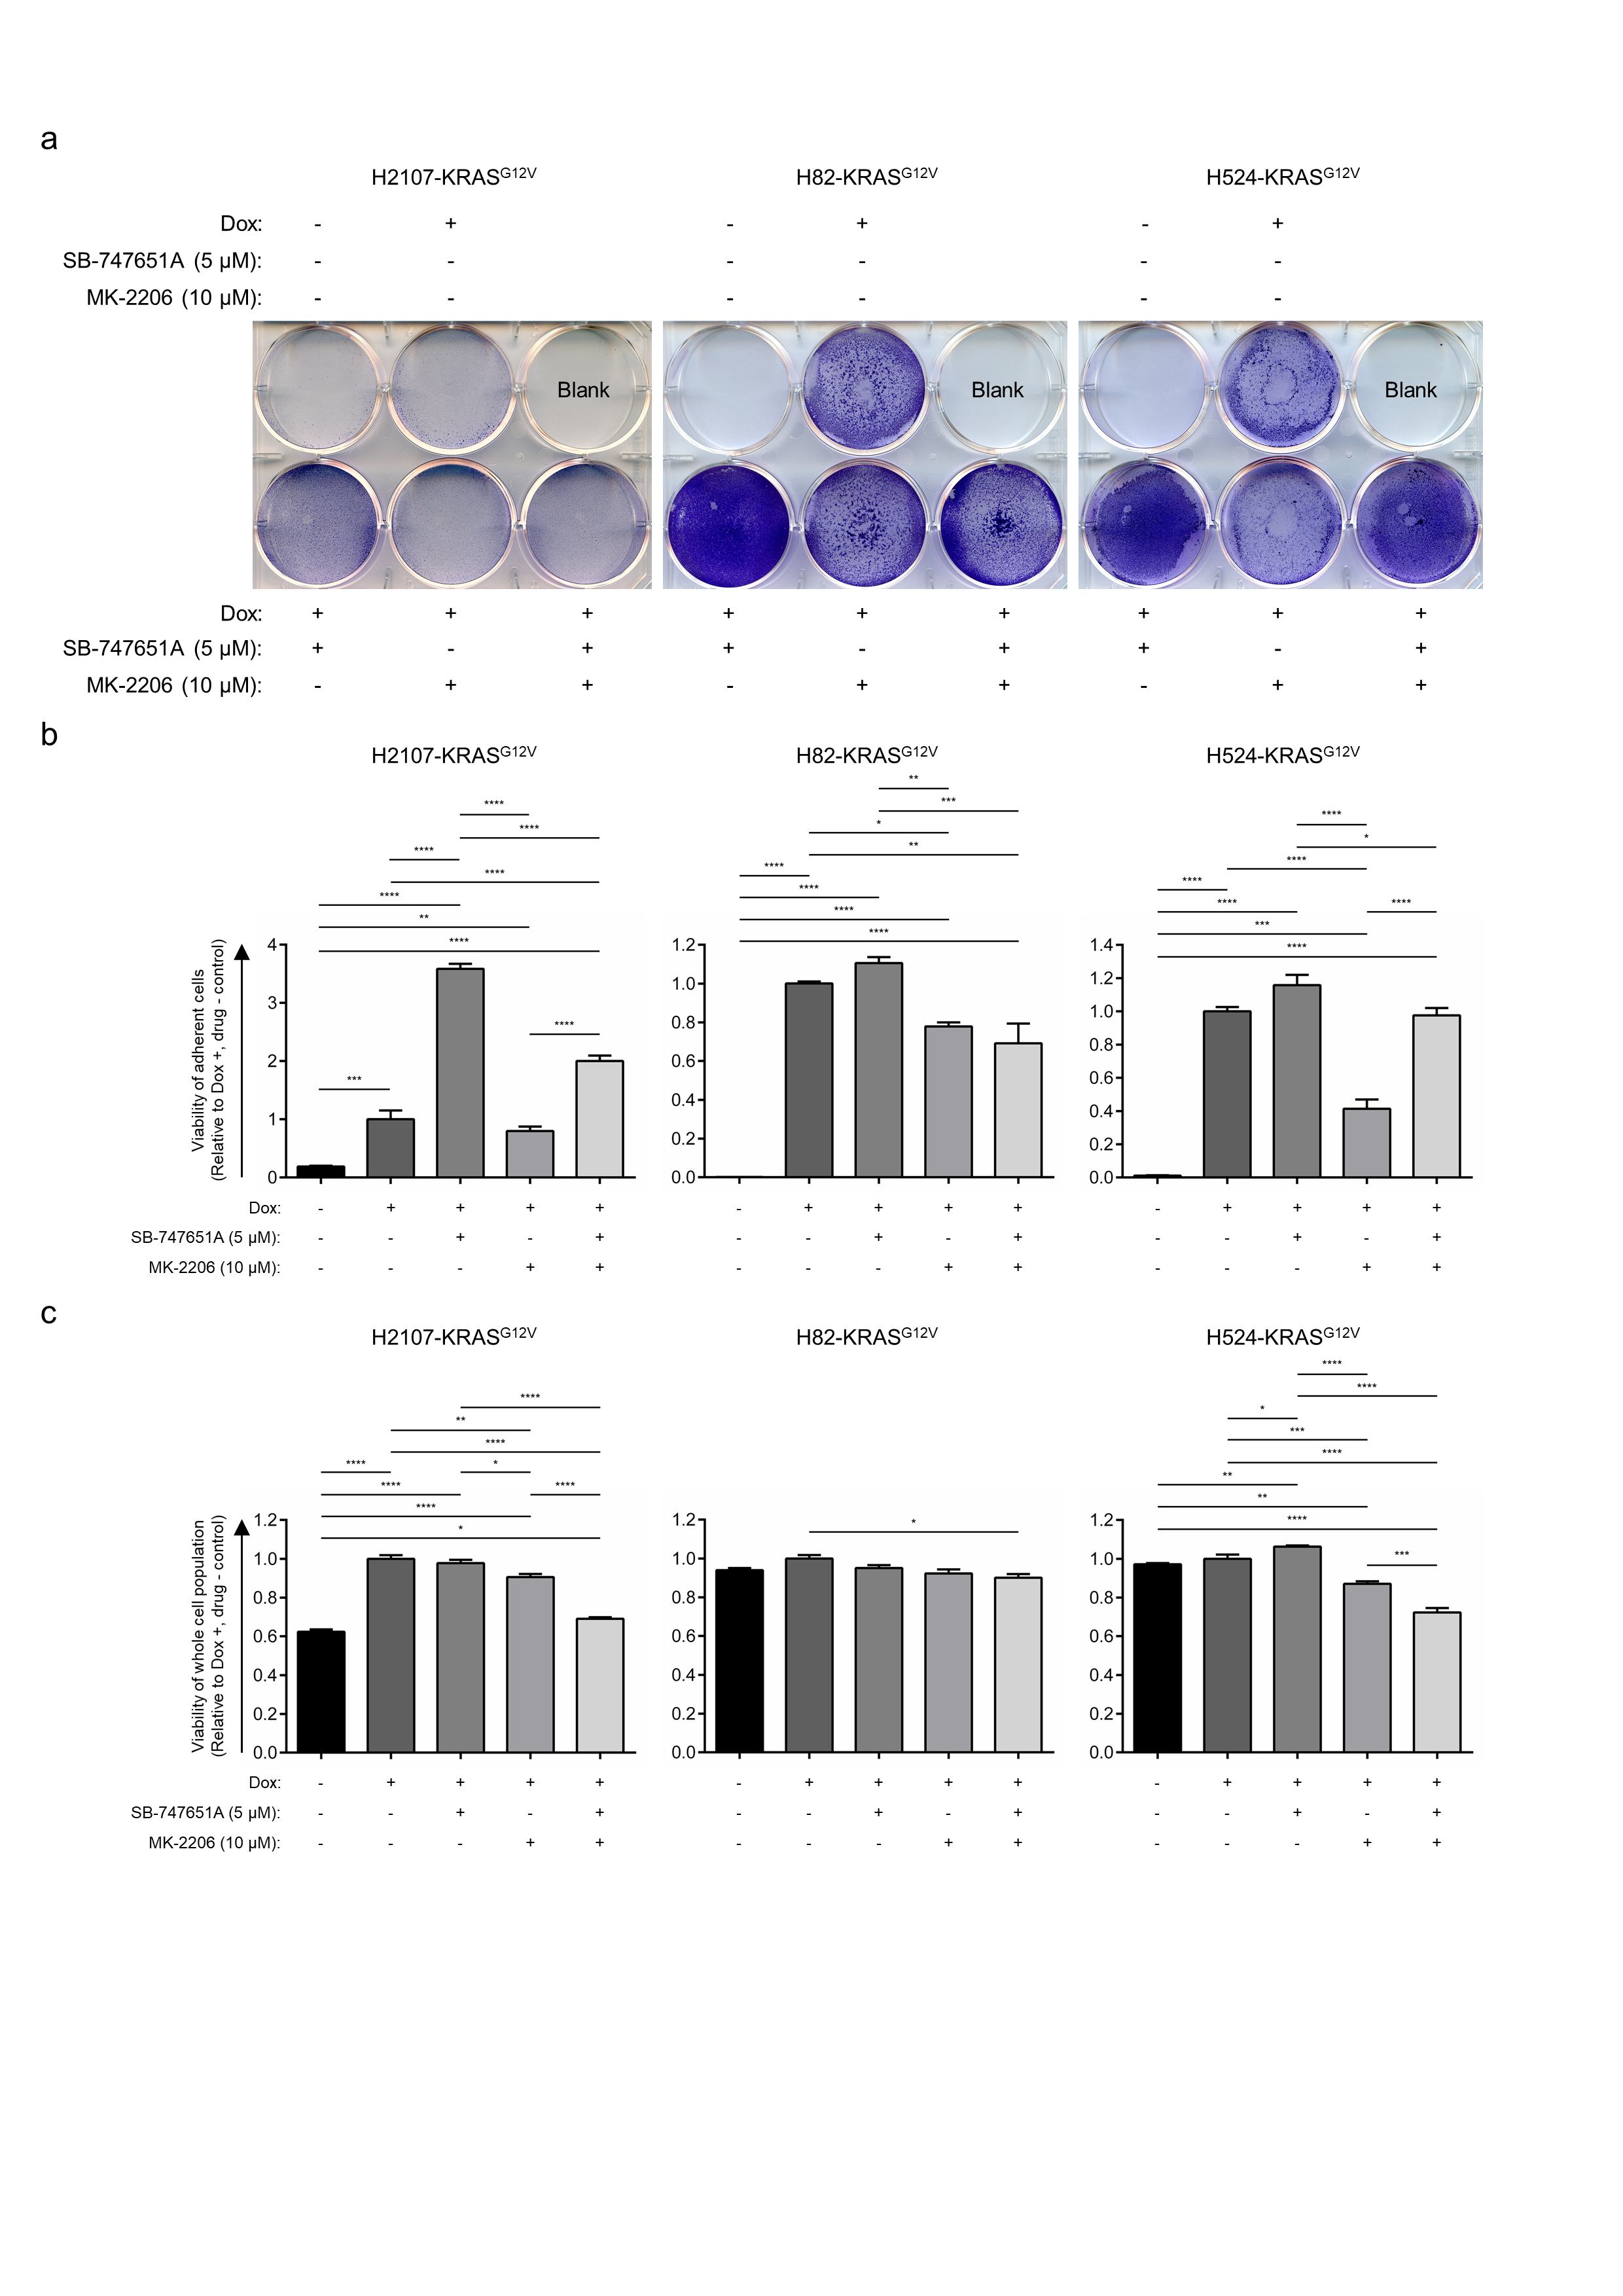

Supplement: supp [file elife-66524-supp-v1.zip › elife_poa_e66524_Figure_2_figure_supplement_2.tif]

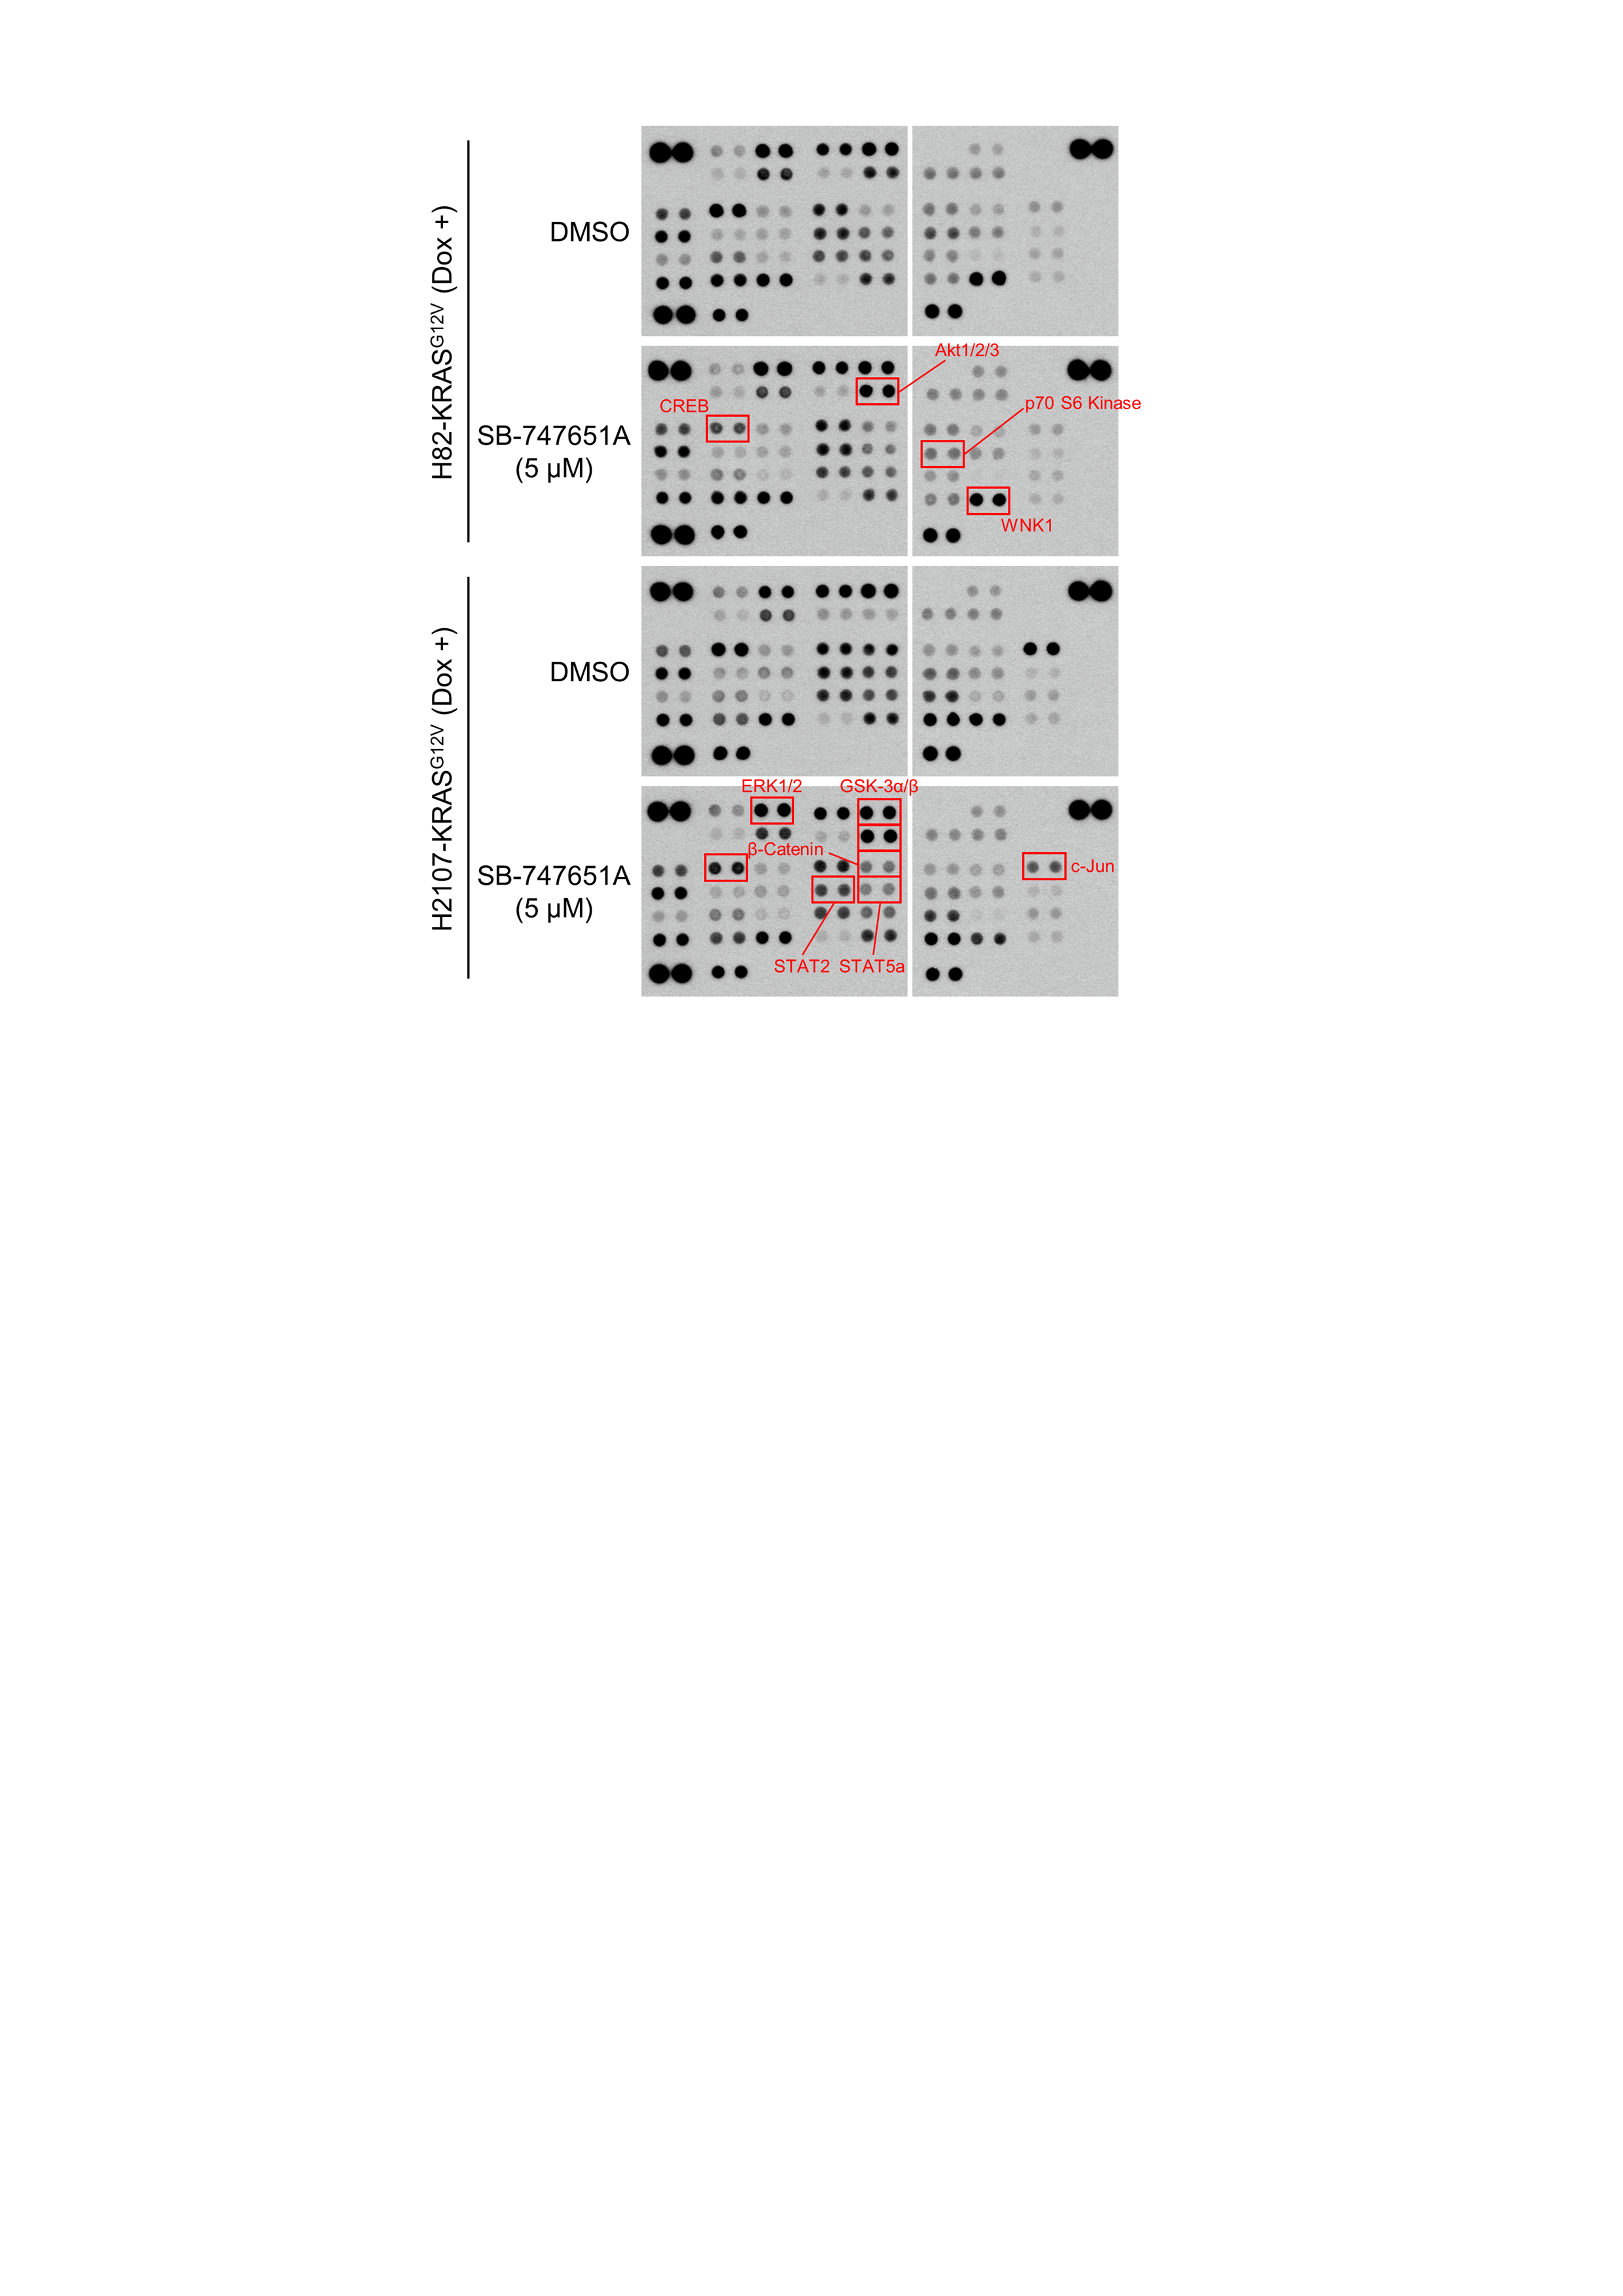

Supplement: supp [file elife-66524-supp-v1.zip › elife_poa_e66524_Figure_2_figure_supplement_3.tif]

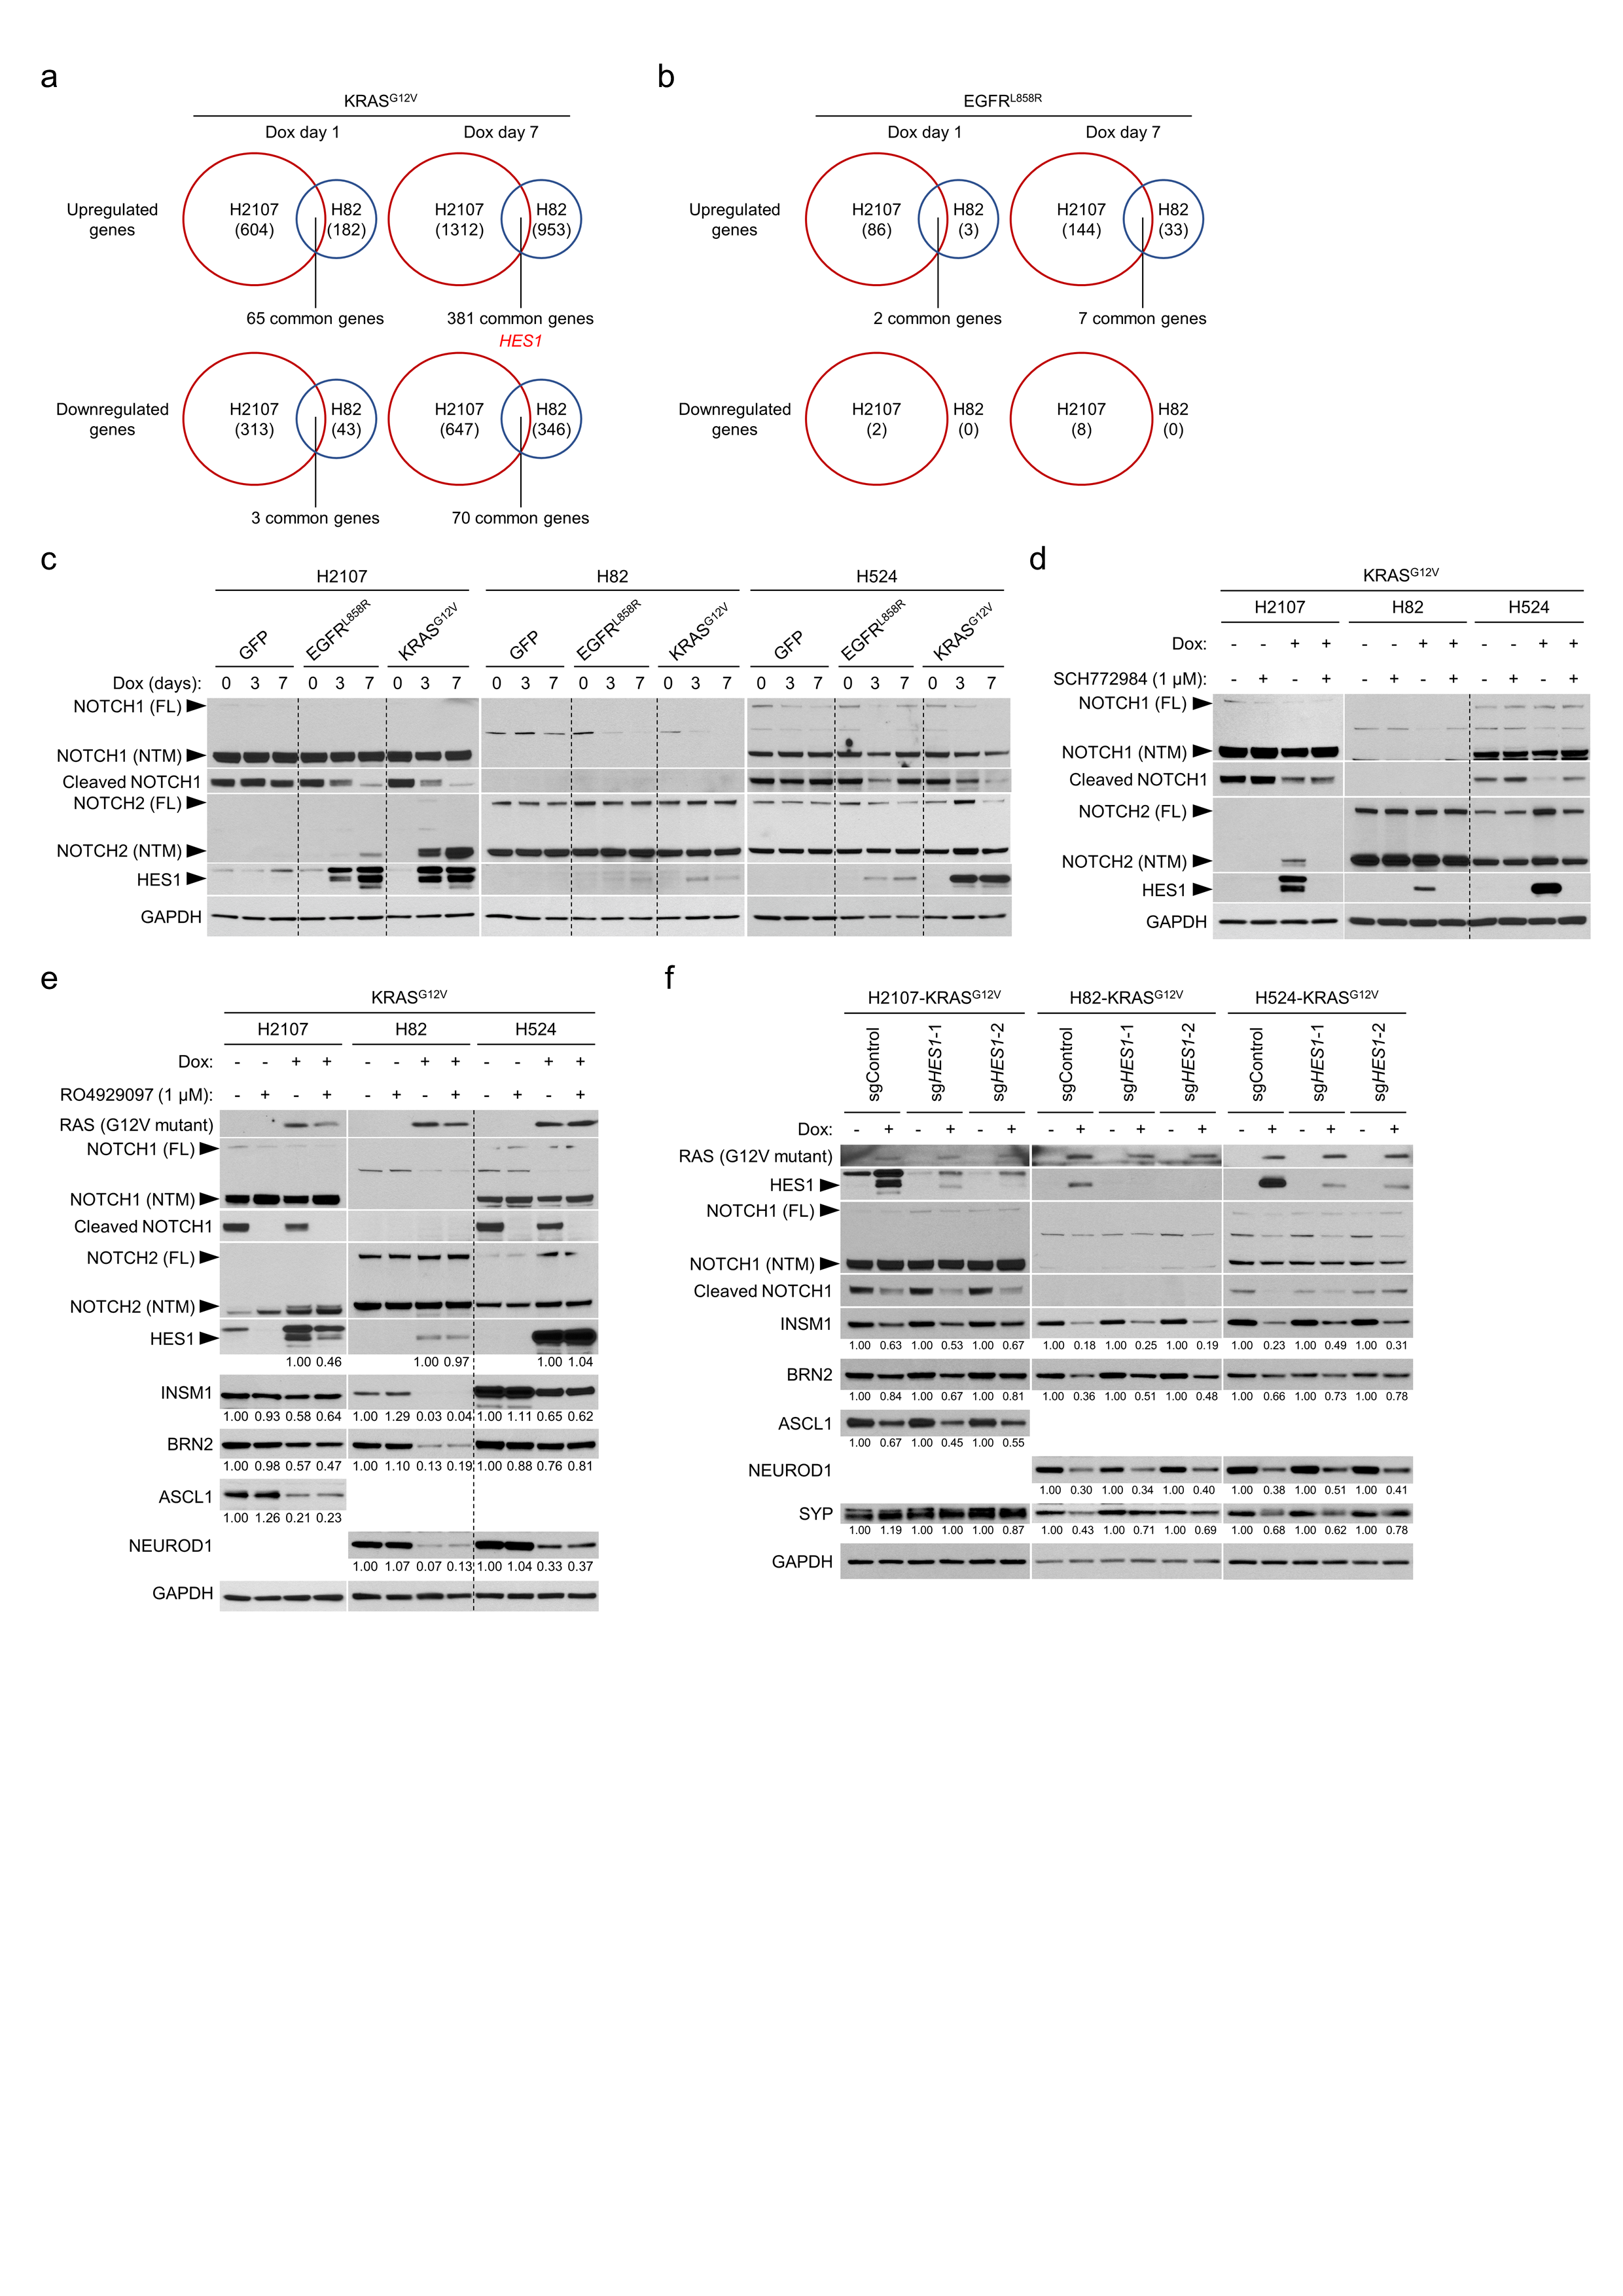

Supplement: supp [file elife-66524-supp-v1.zip › elife_poa_e66524_Figure_2_figure_supplement_4.tif]

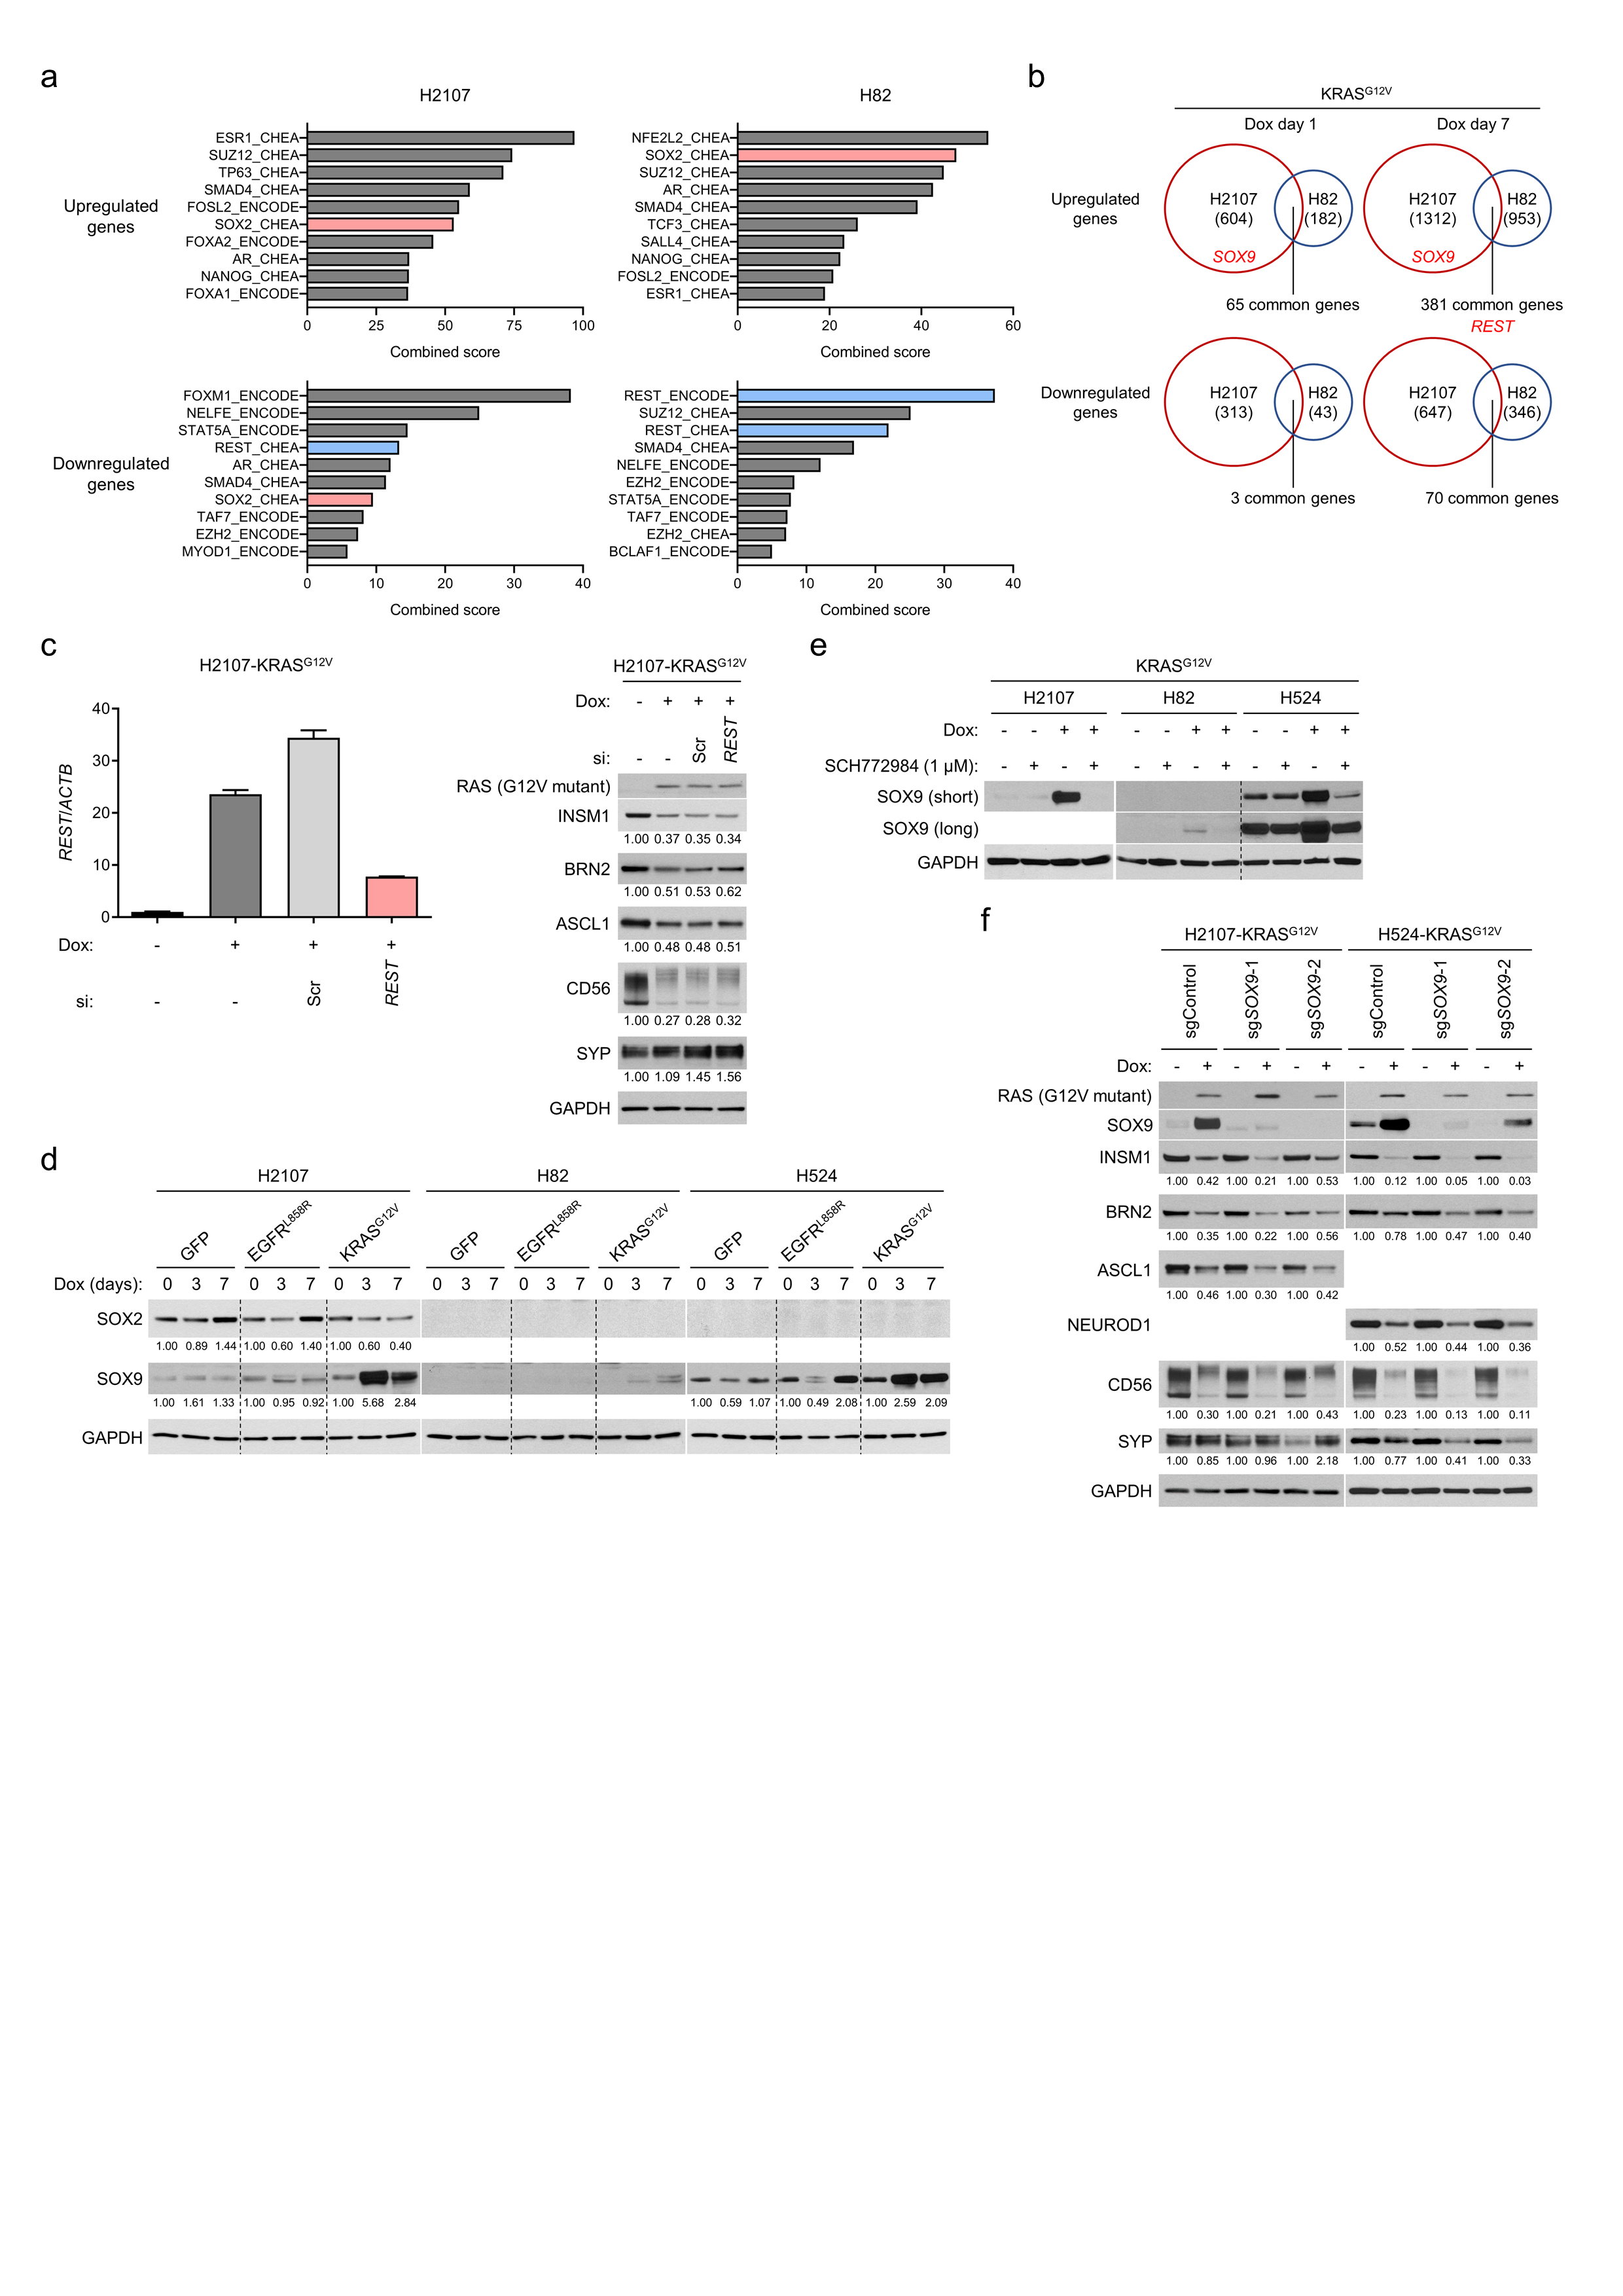

Supplement: supp [file elife-66524-supp-v1.zip › elife_poa_e66524_Figure_2_figure_supplement_5.tif]

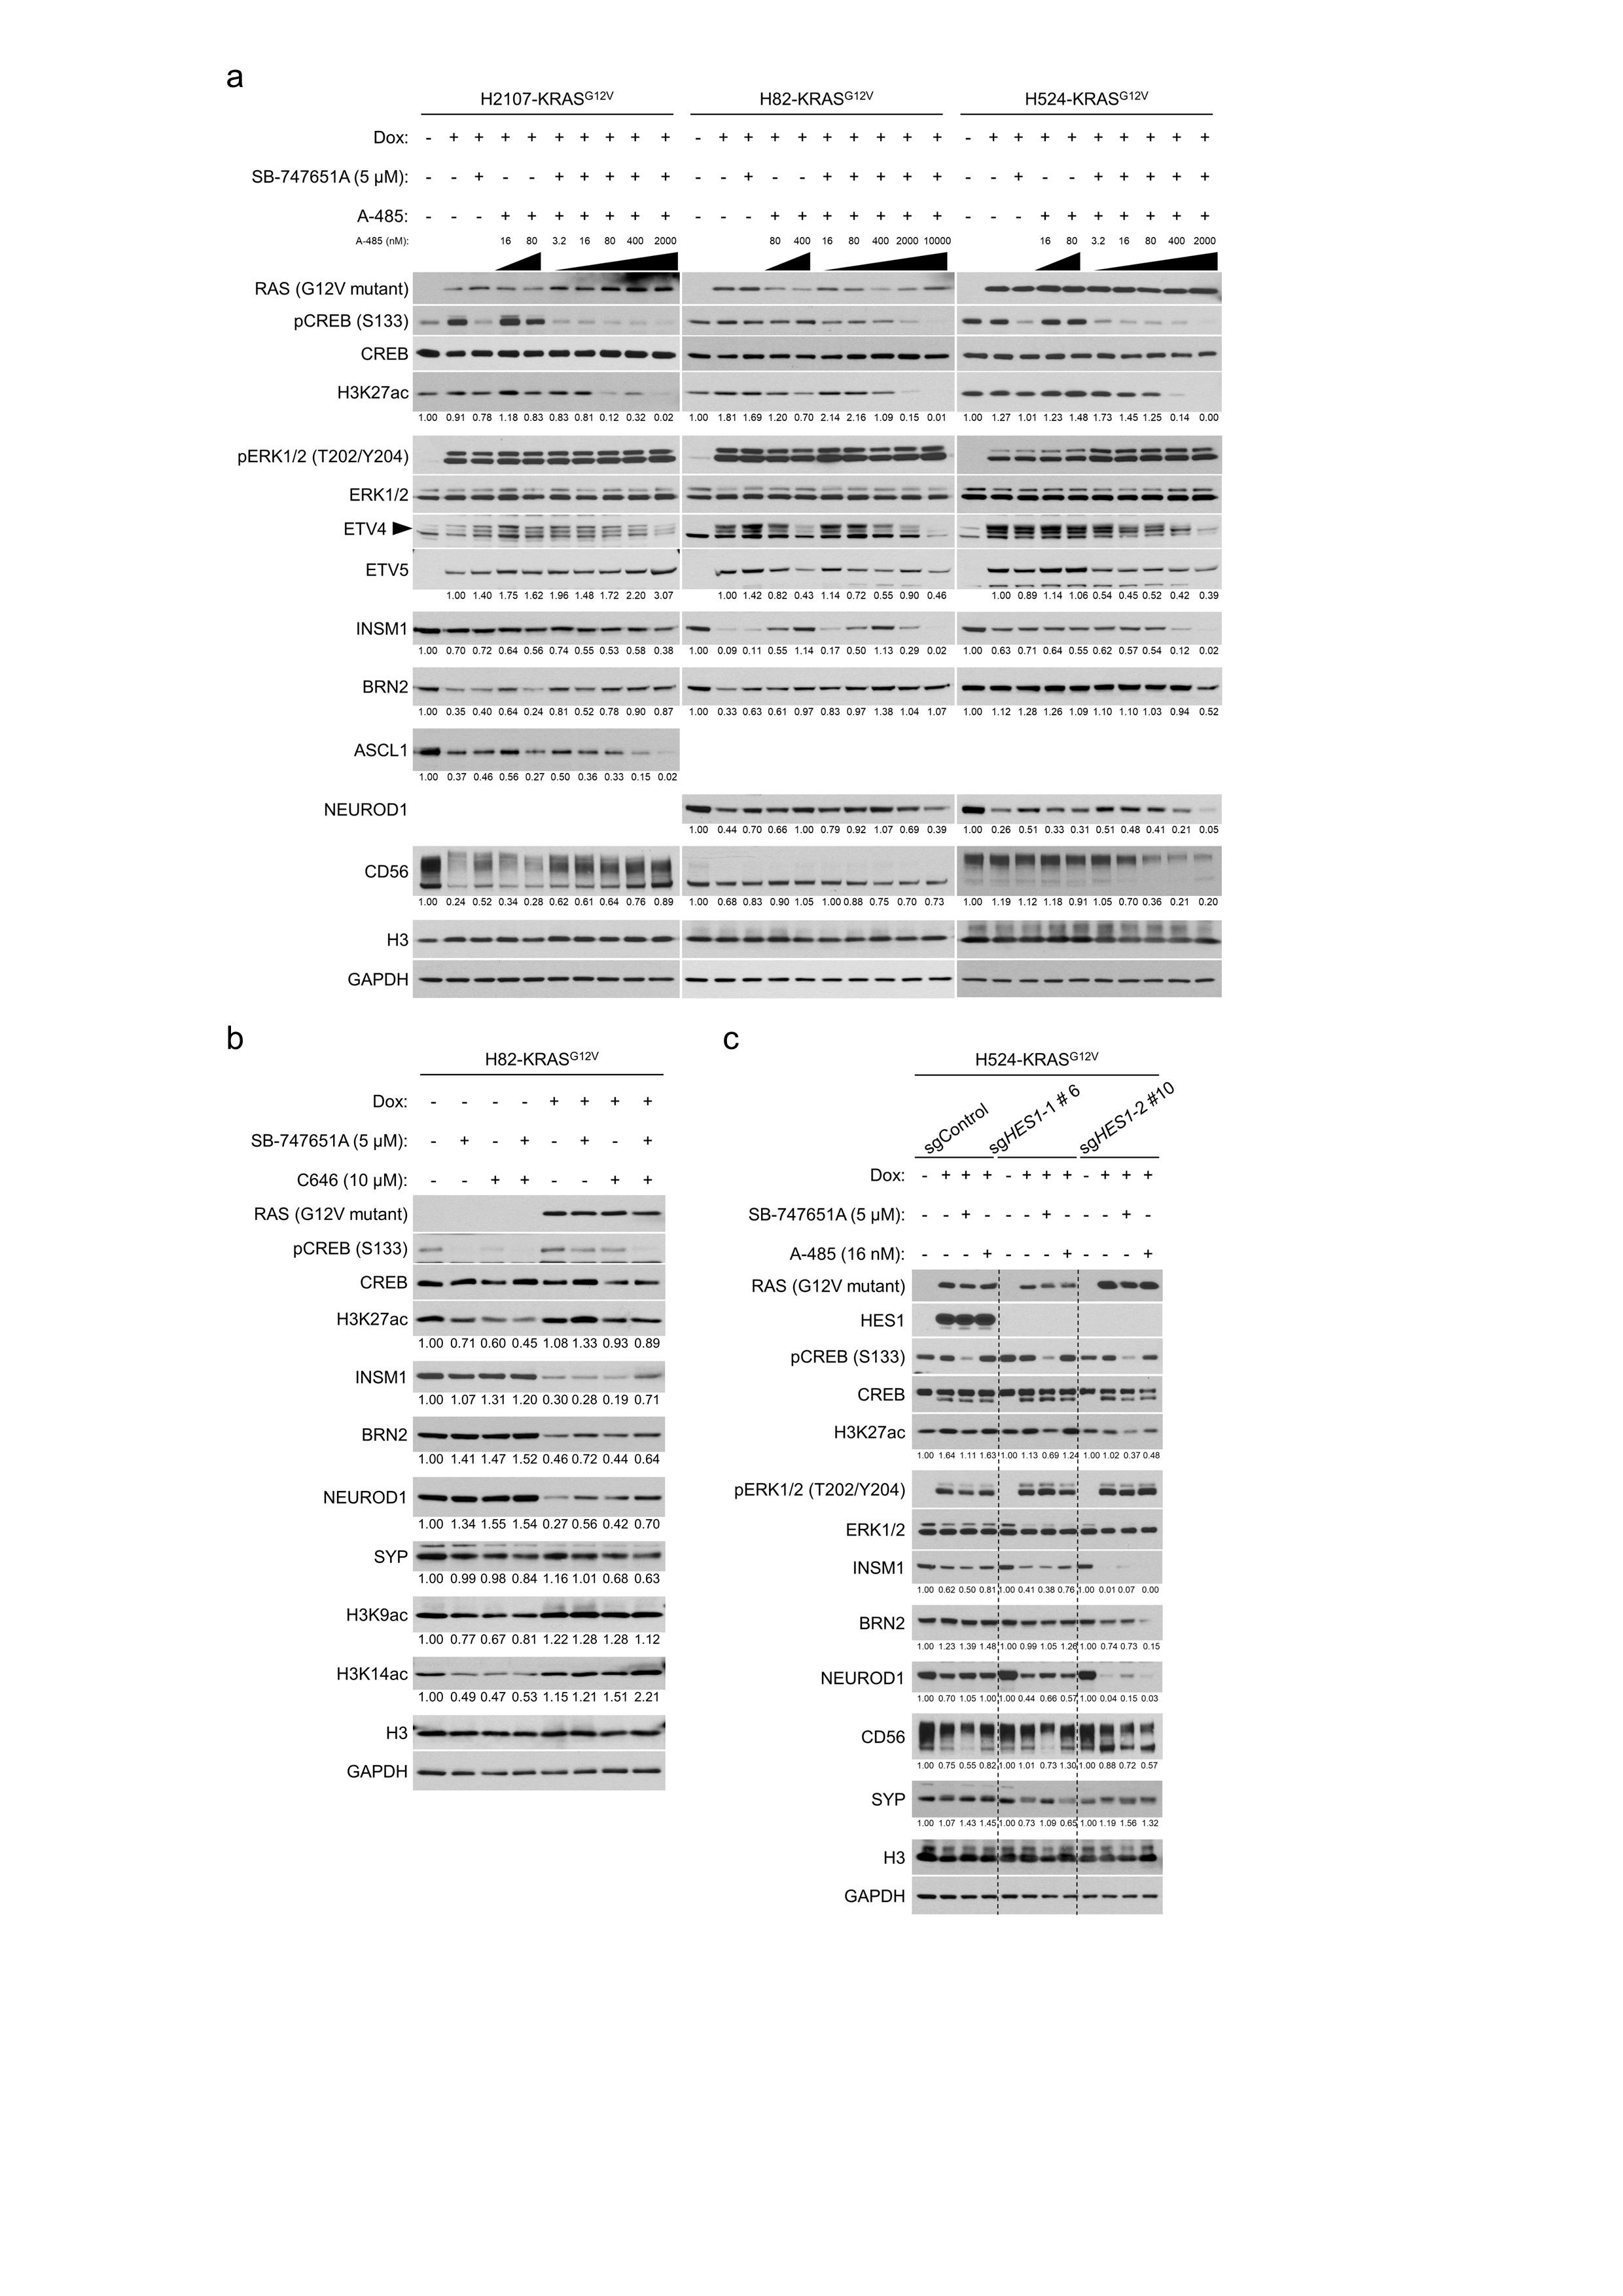

Supplement: supp [file elife-66524-supp-v1.zip › elife_poa_e66524_Figure_4_figure_supplement_1.tif]

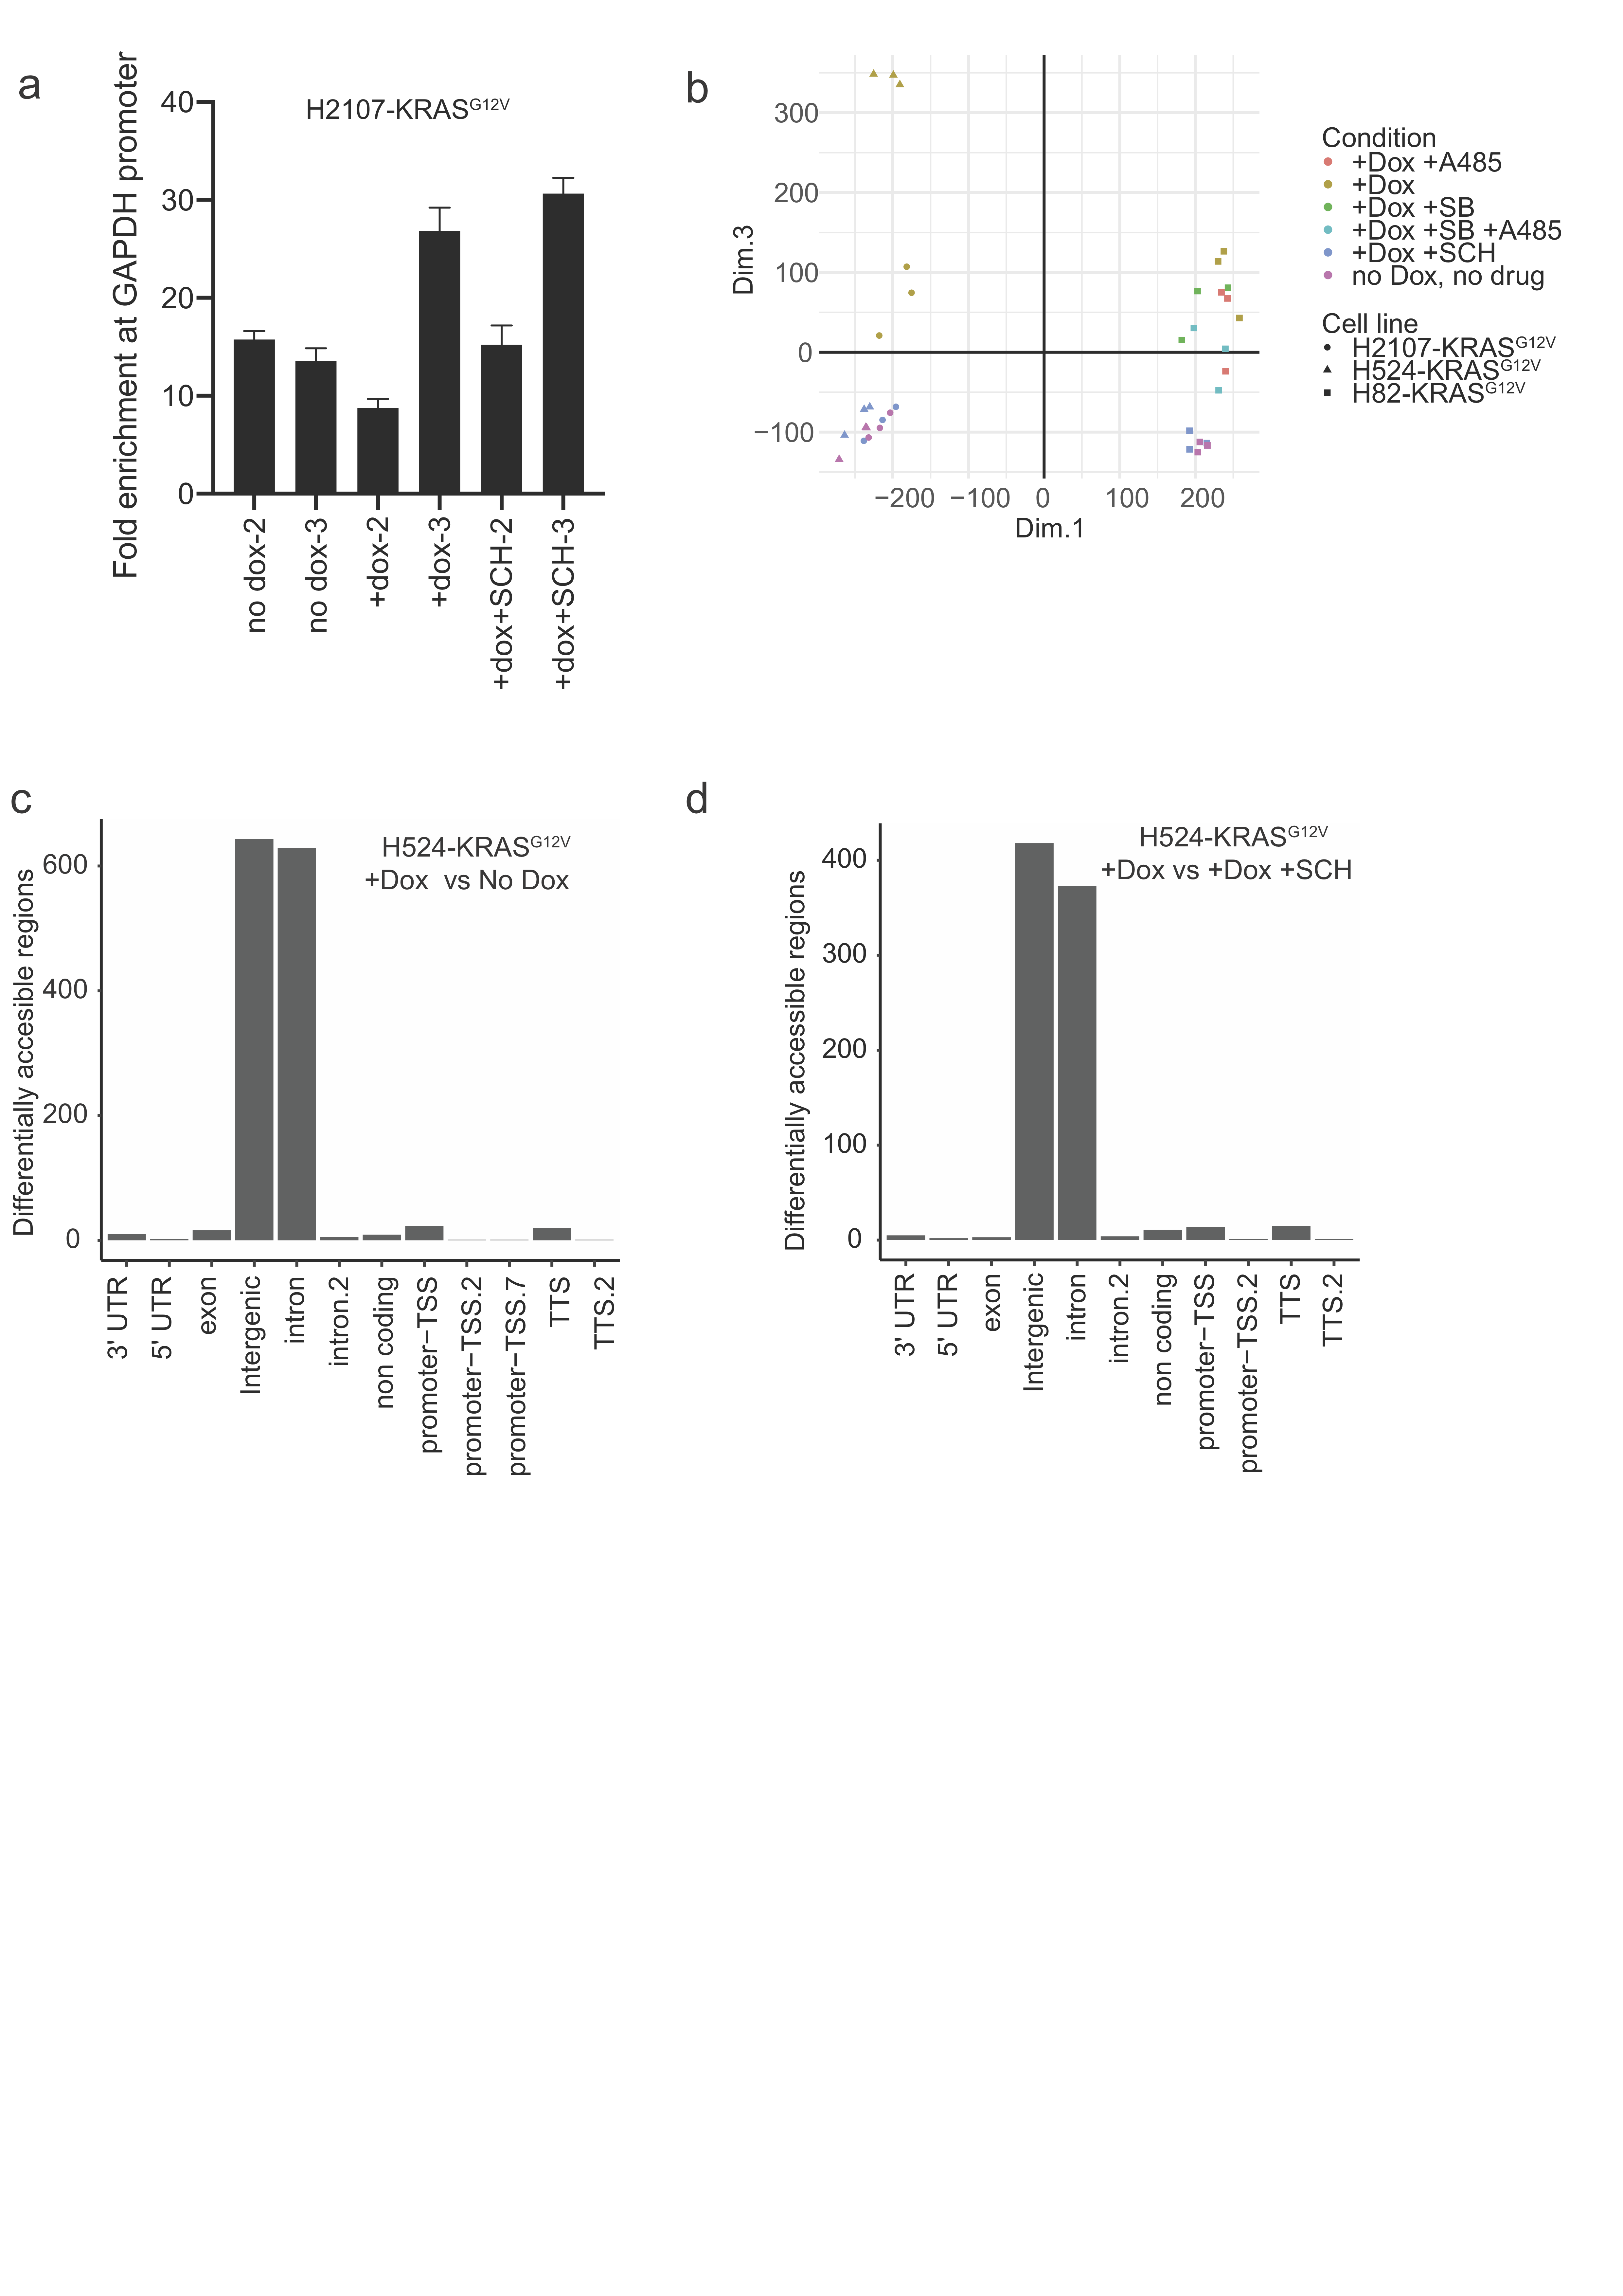

Supplement: supp [file elife-66524-supp-v1.zip › elife_poa_e66524_Figure_5_figure_supplement_1.tif]

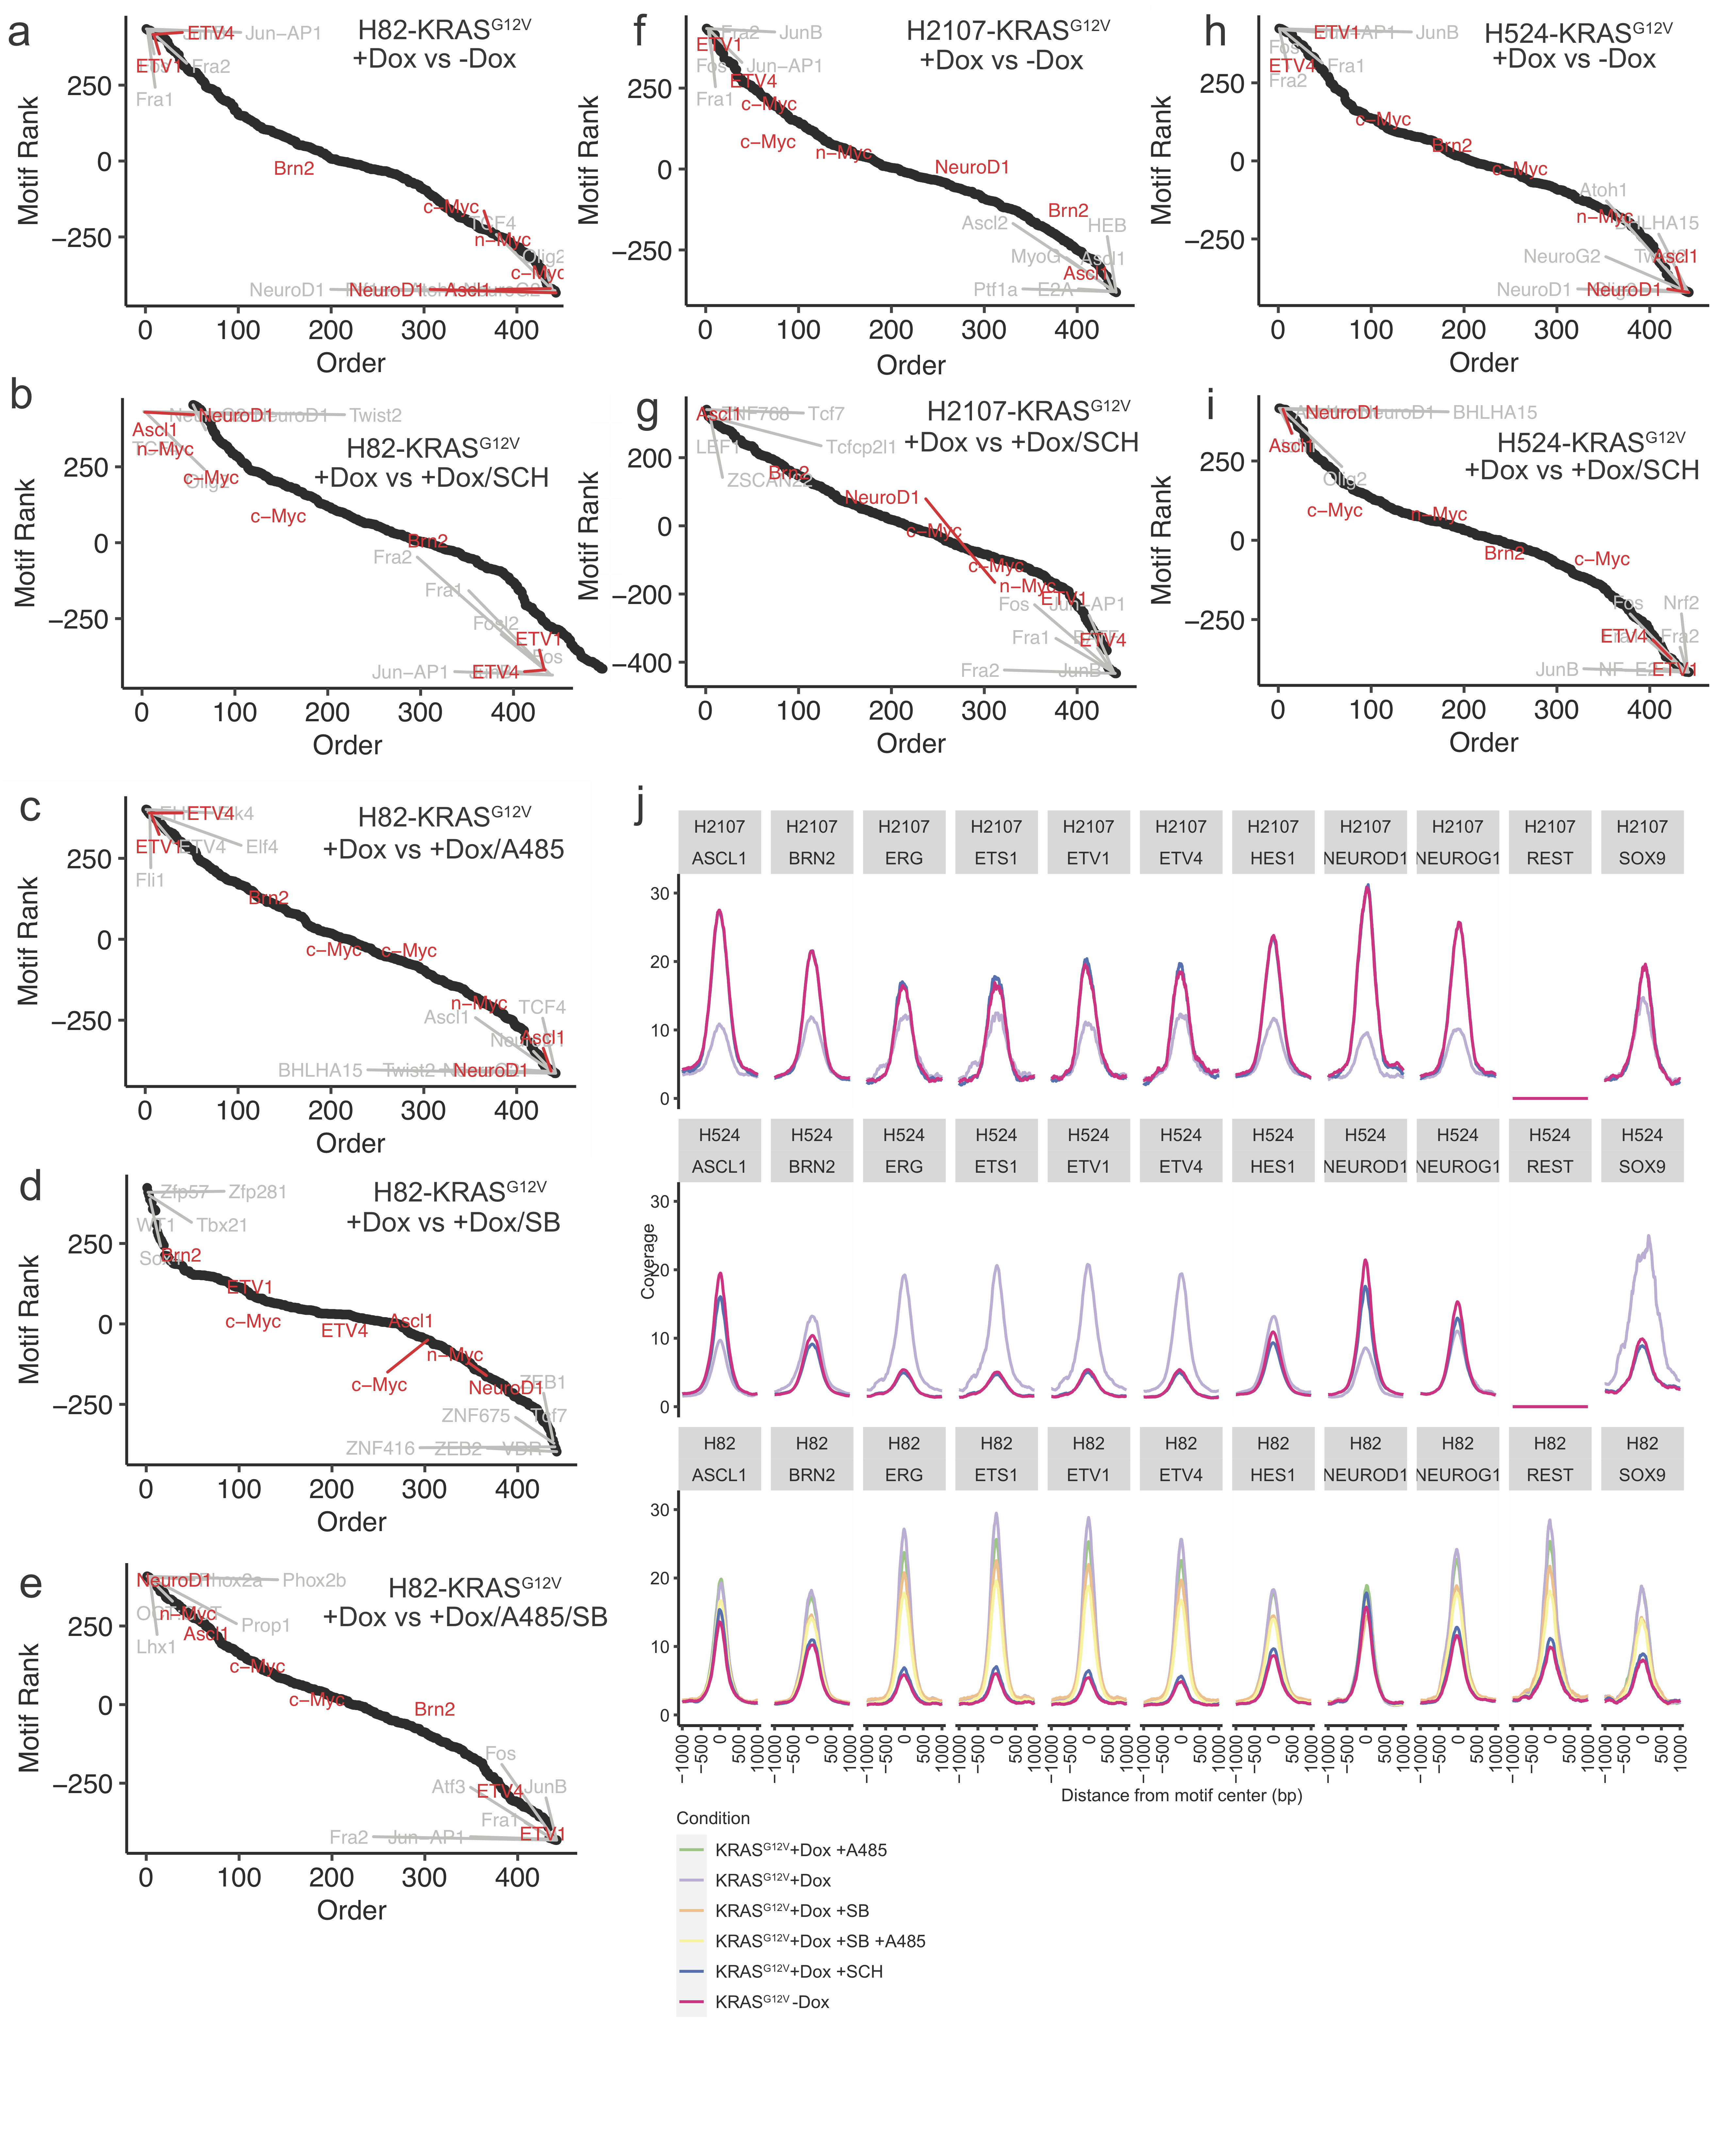

Supplement: supp [file elife-66524-supp-v1.zip › elife_poa_e66524_Figure_5_figure_supplement_2.tif]

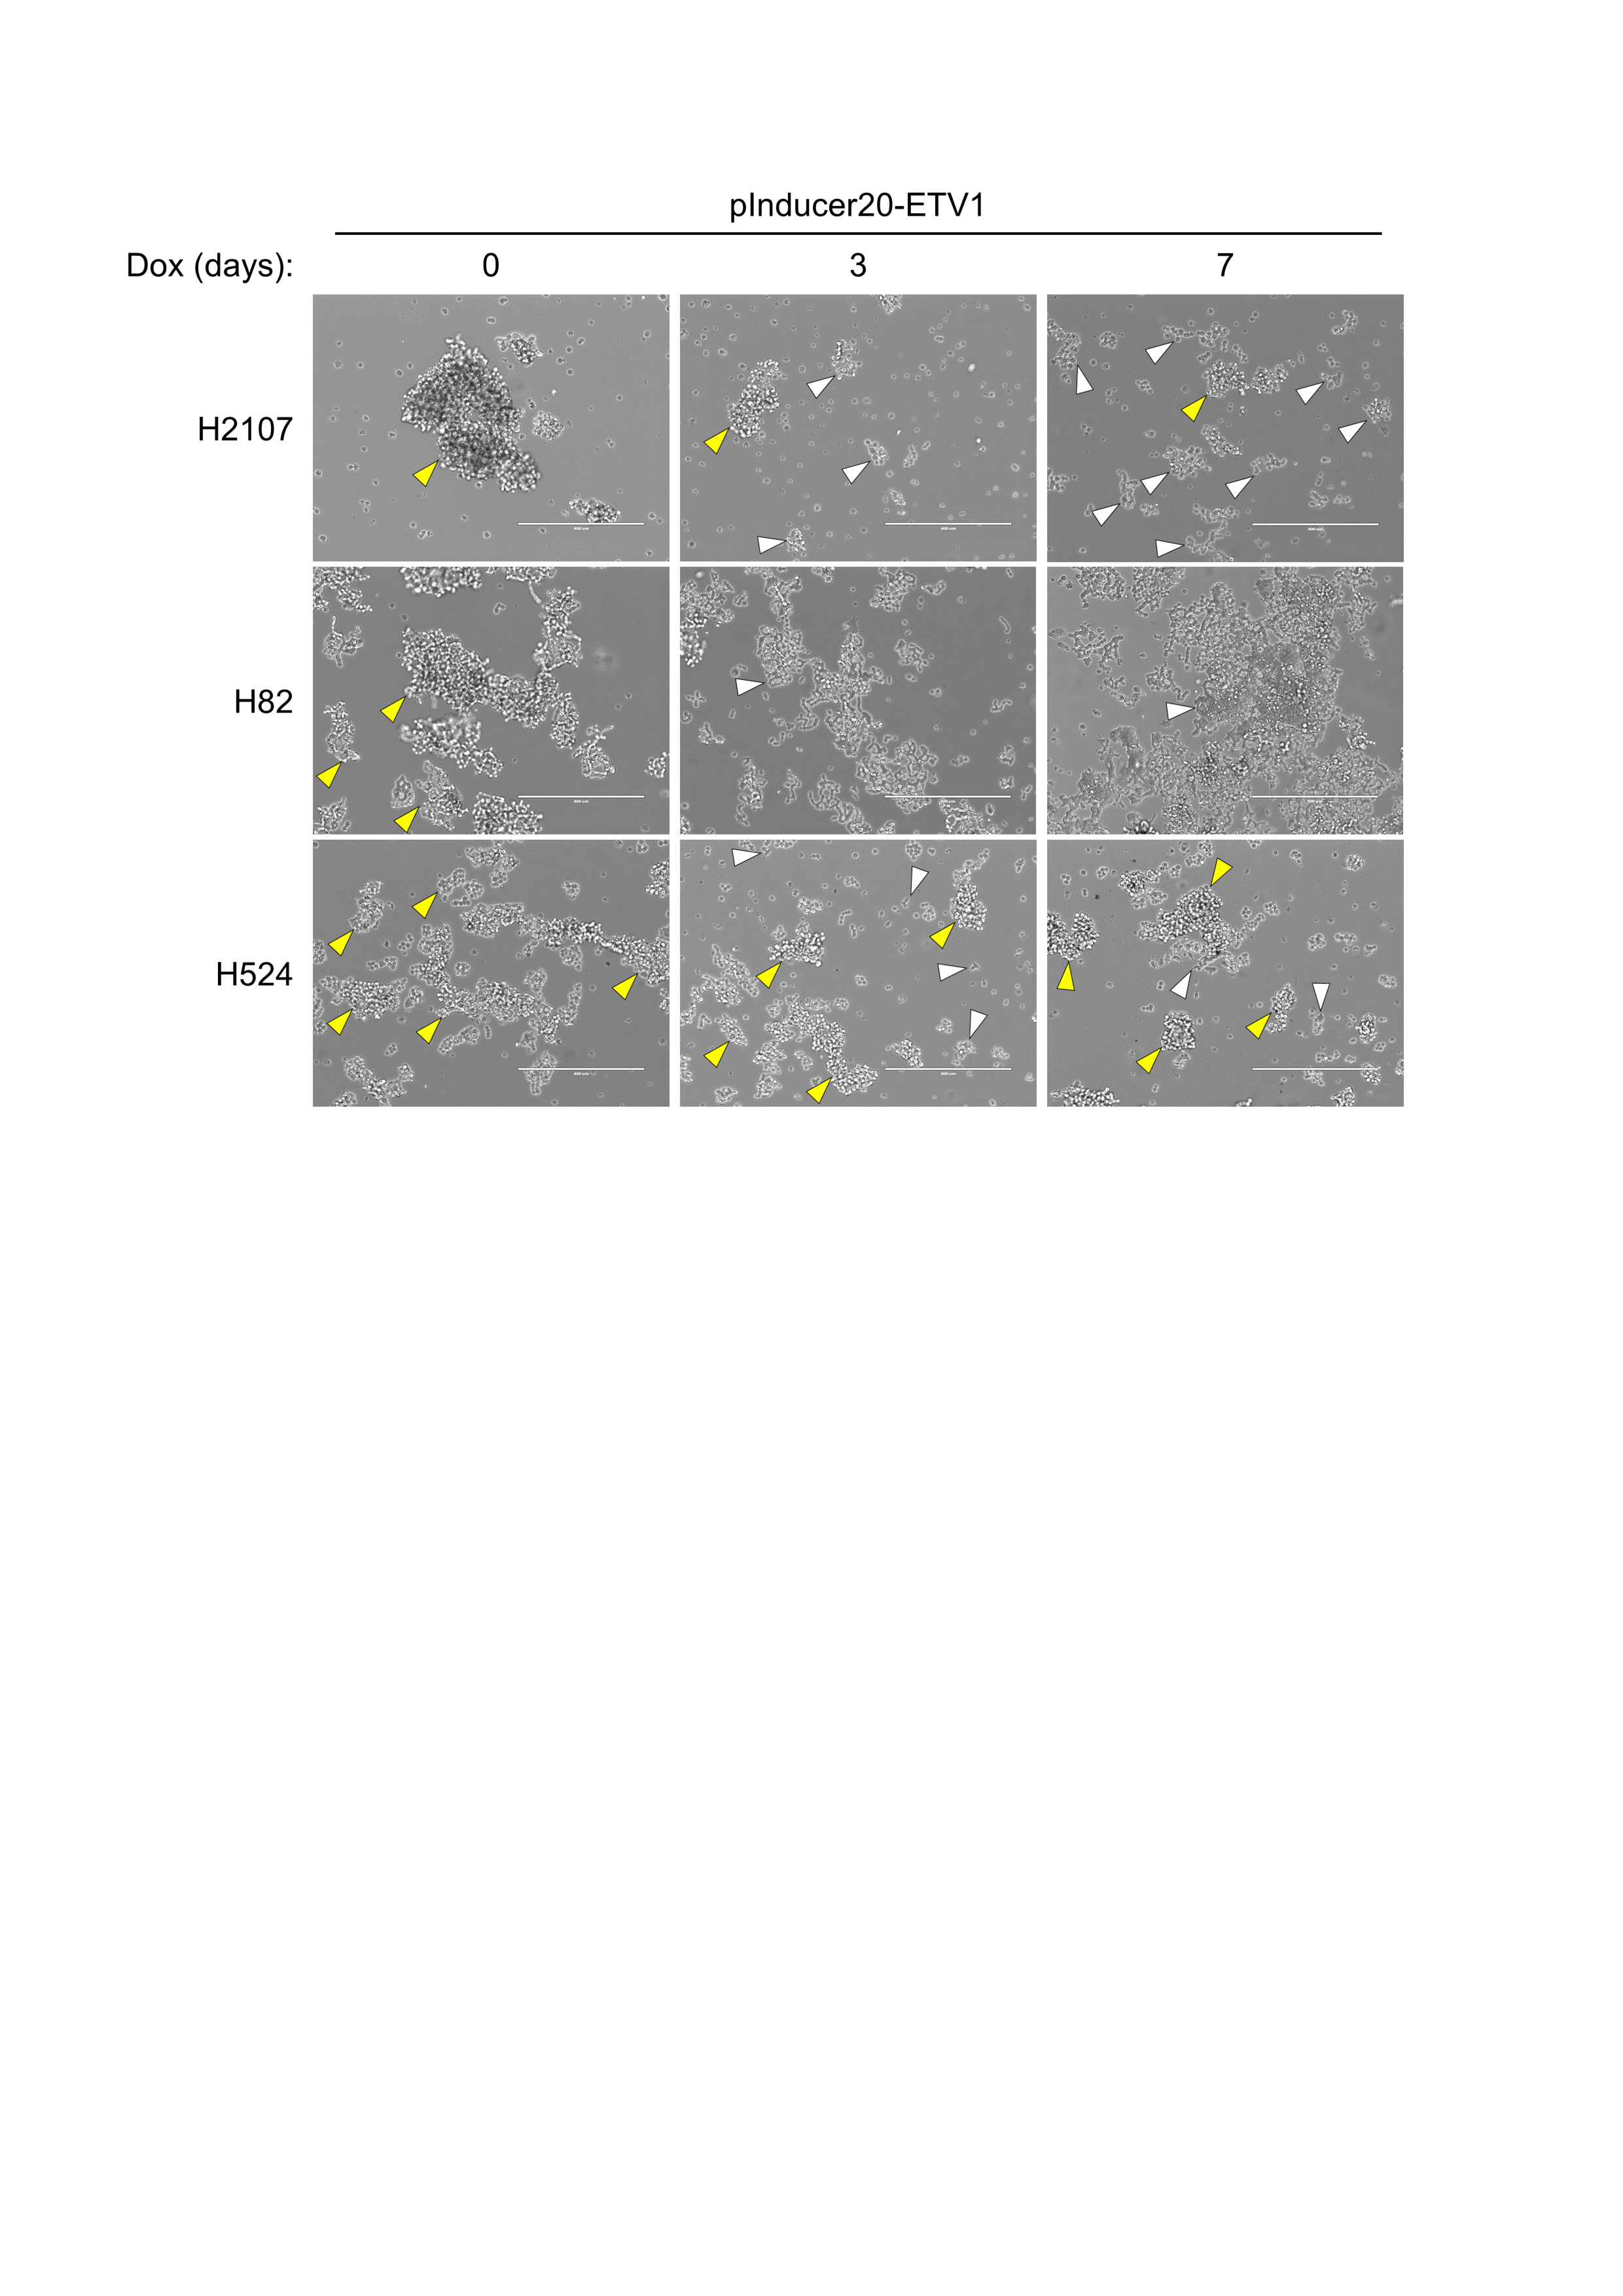

Supplement: supp [file elife-66524-supp-v1.zip › elife_poa_e66524_Figure_6_figure_supplement_1.tif]

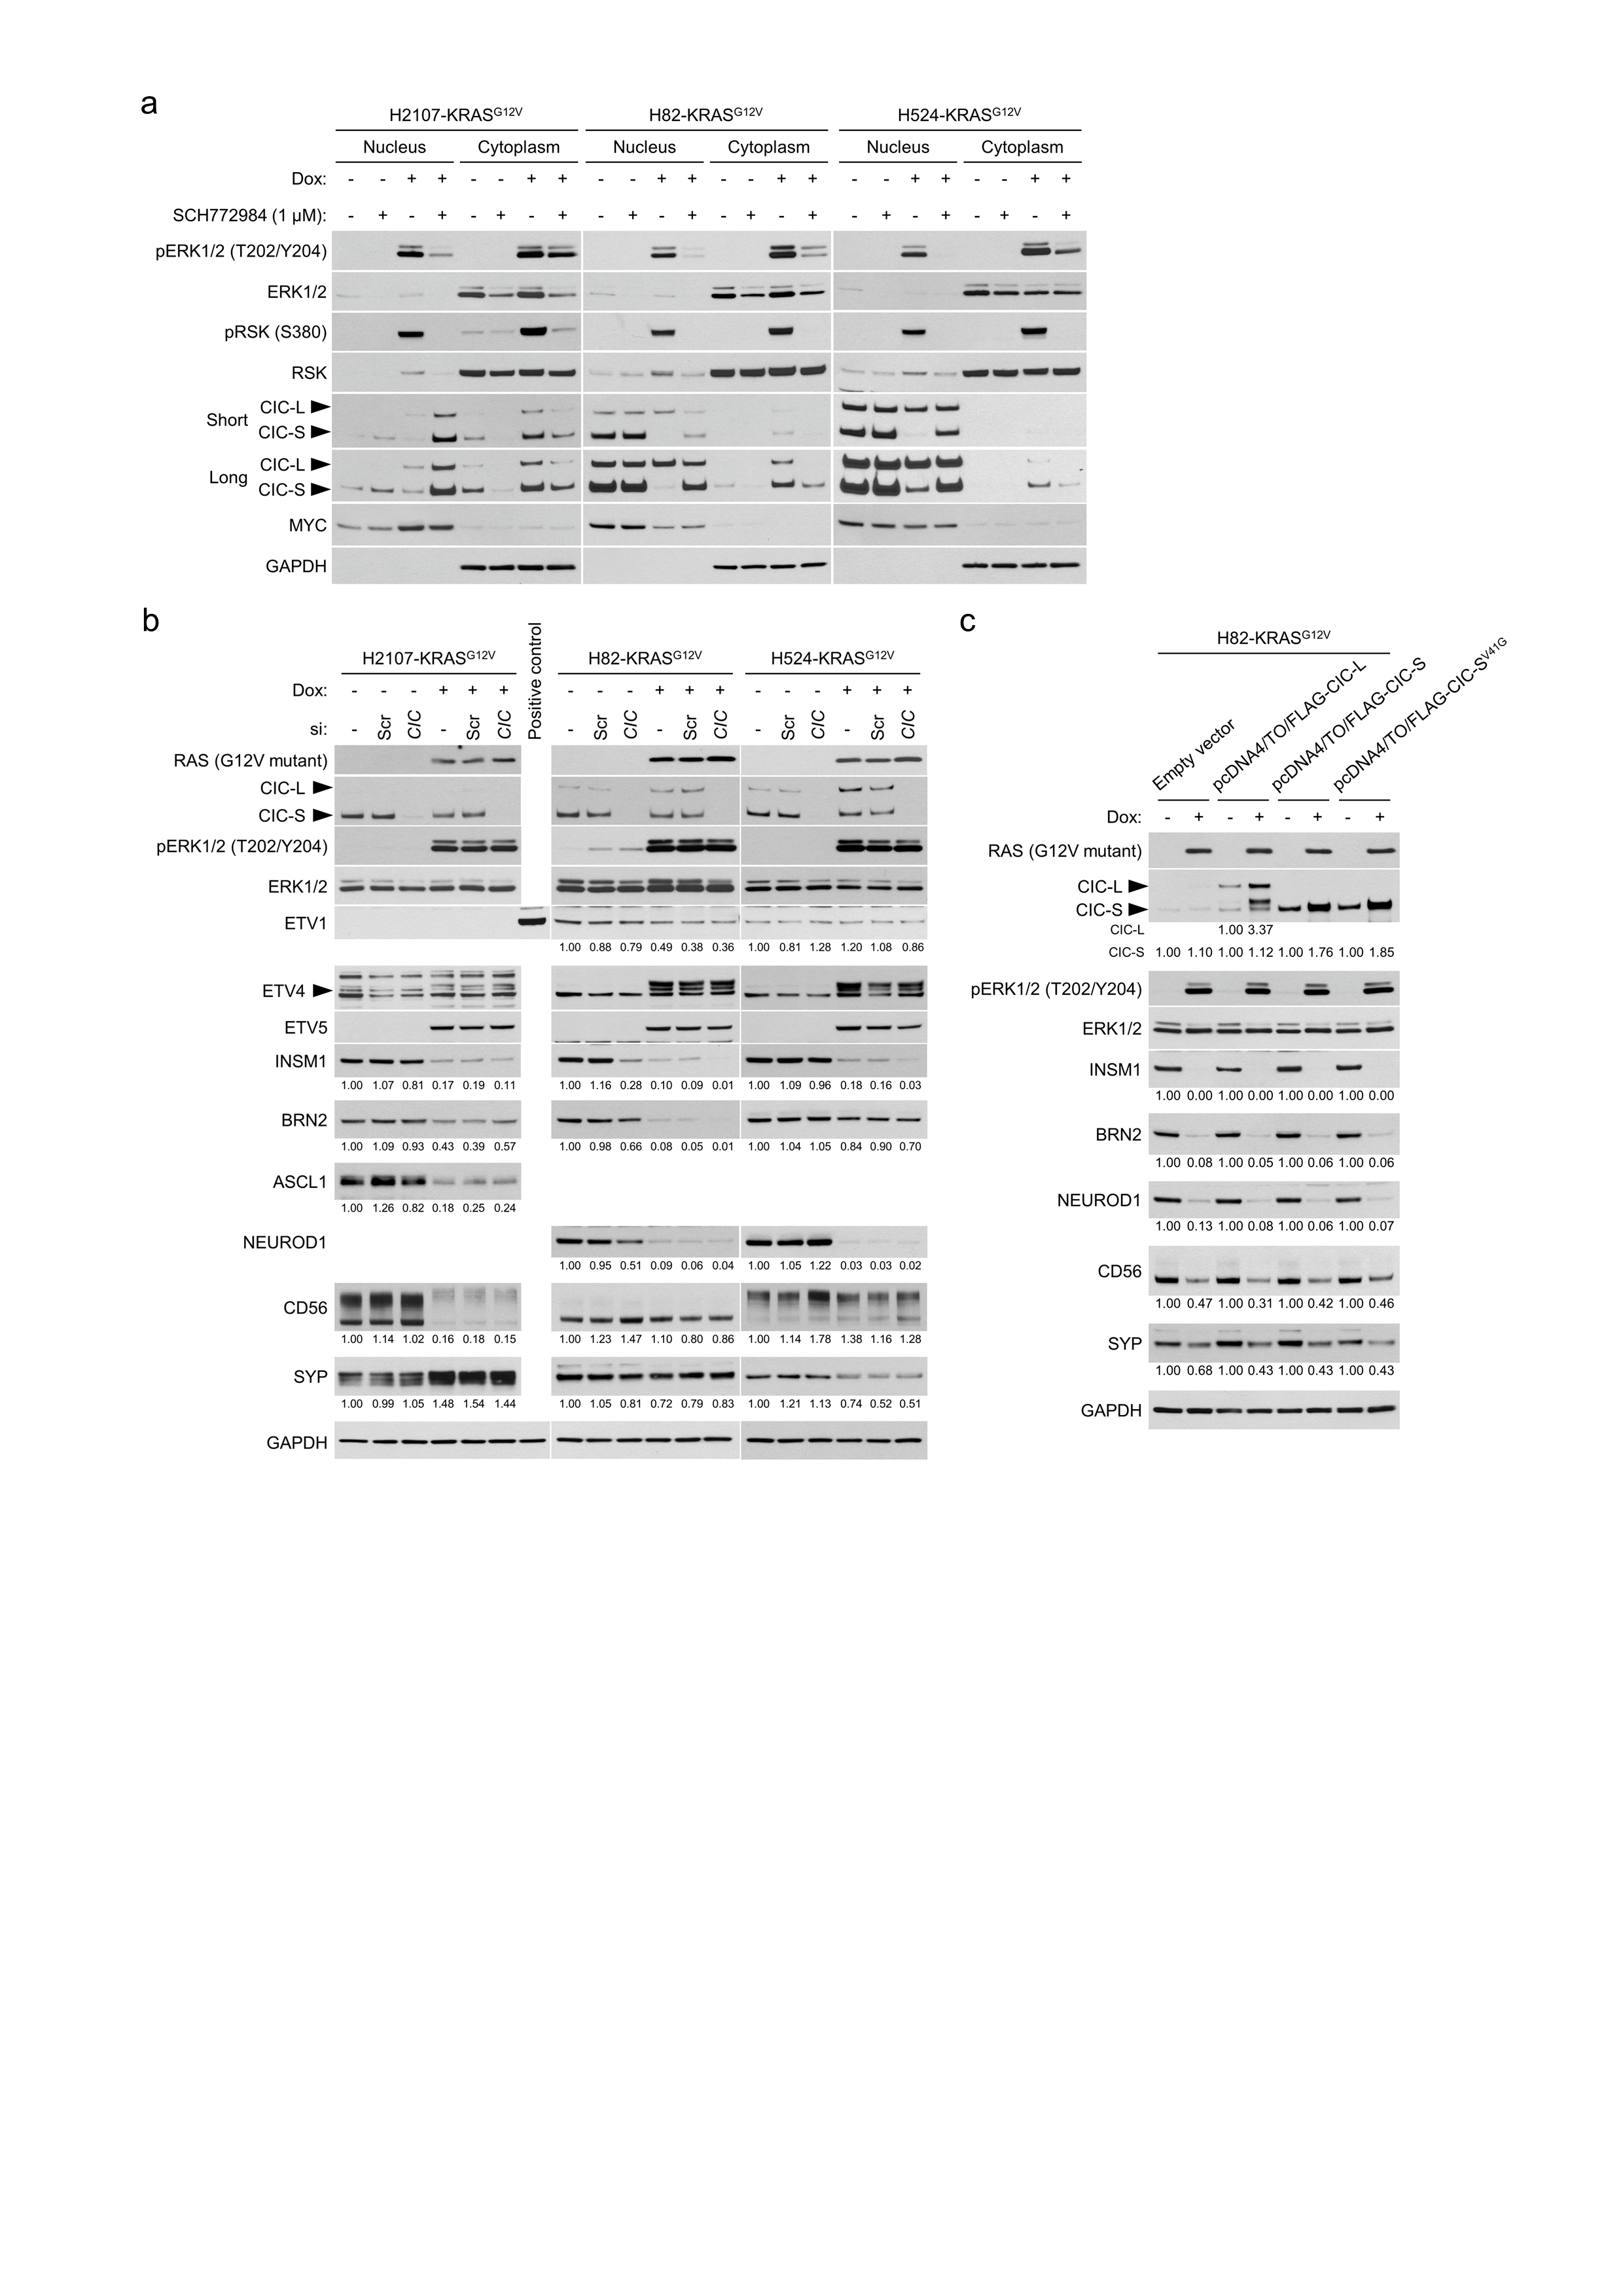

Supplement: supp [file elife-66524-supp-v1.zip › elife_poa_e66524_Figure_6_figure_supplement_2.tif]

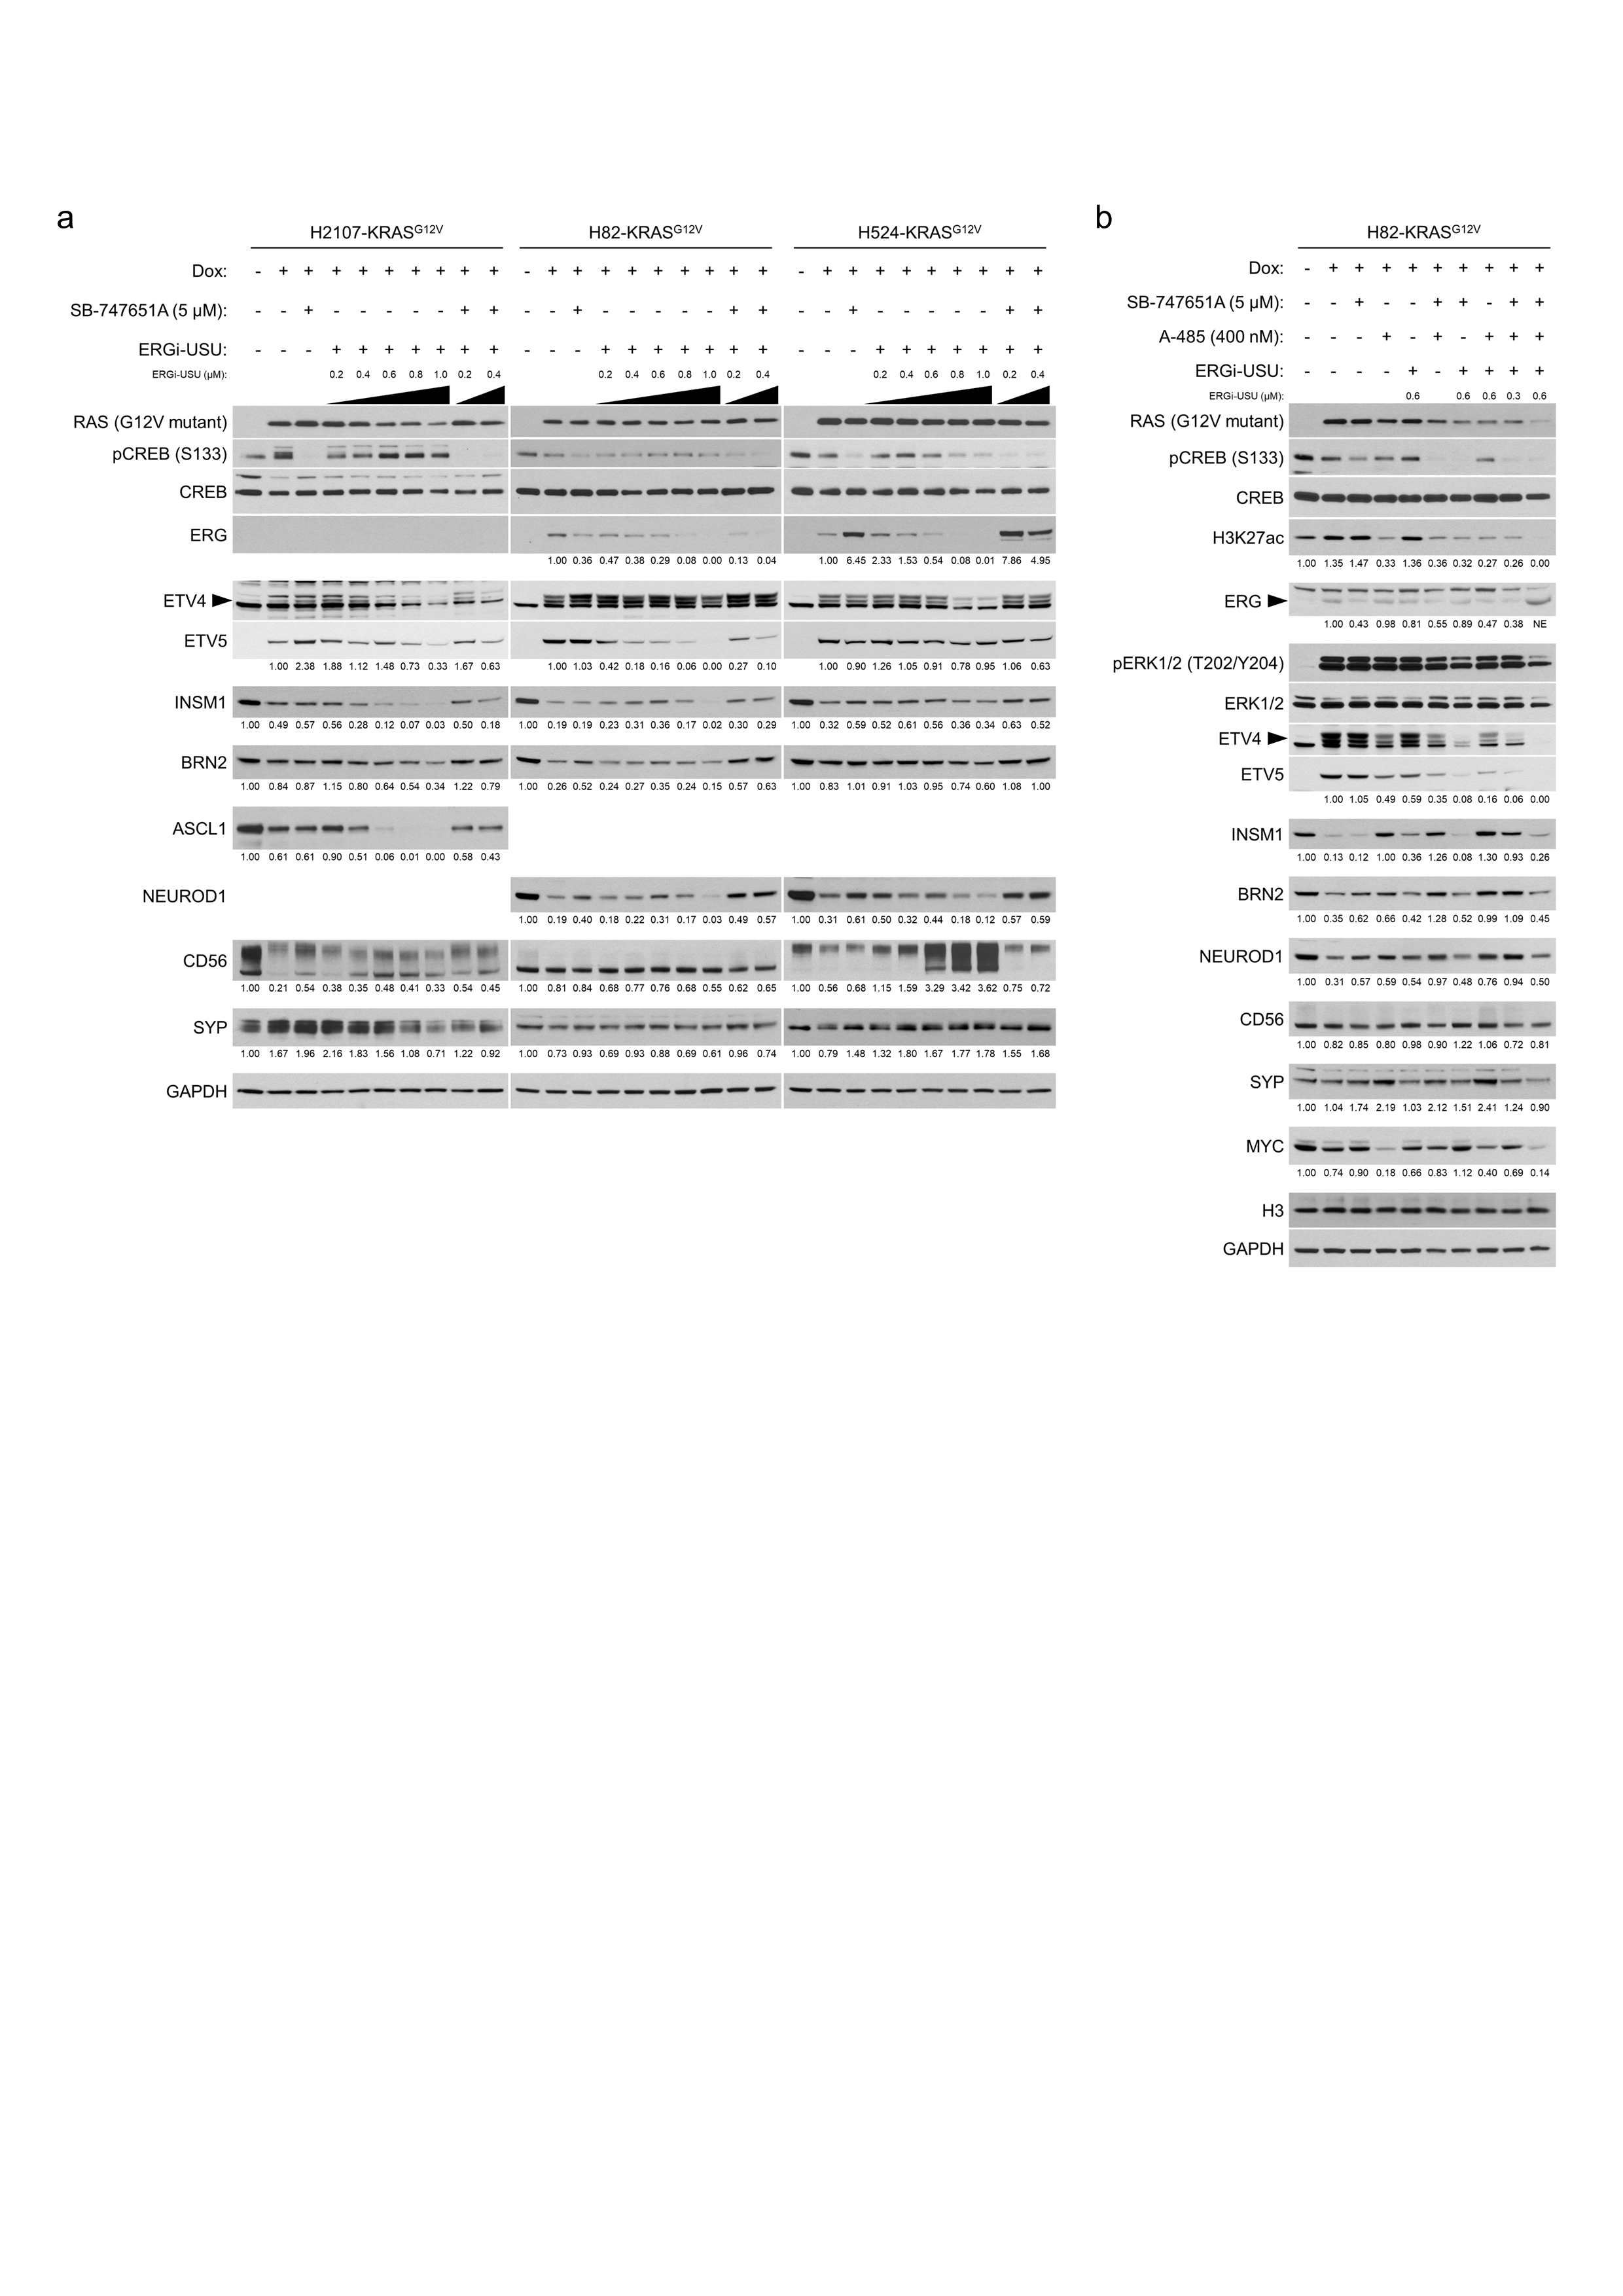

Supplement: supp [file elife-66524-supp-v1.zip › elife_poa_e66524_Figure_6_figure_supplement_3.tif]

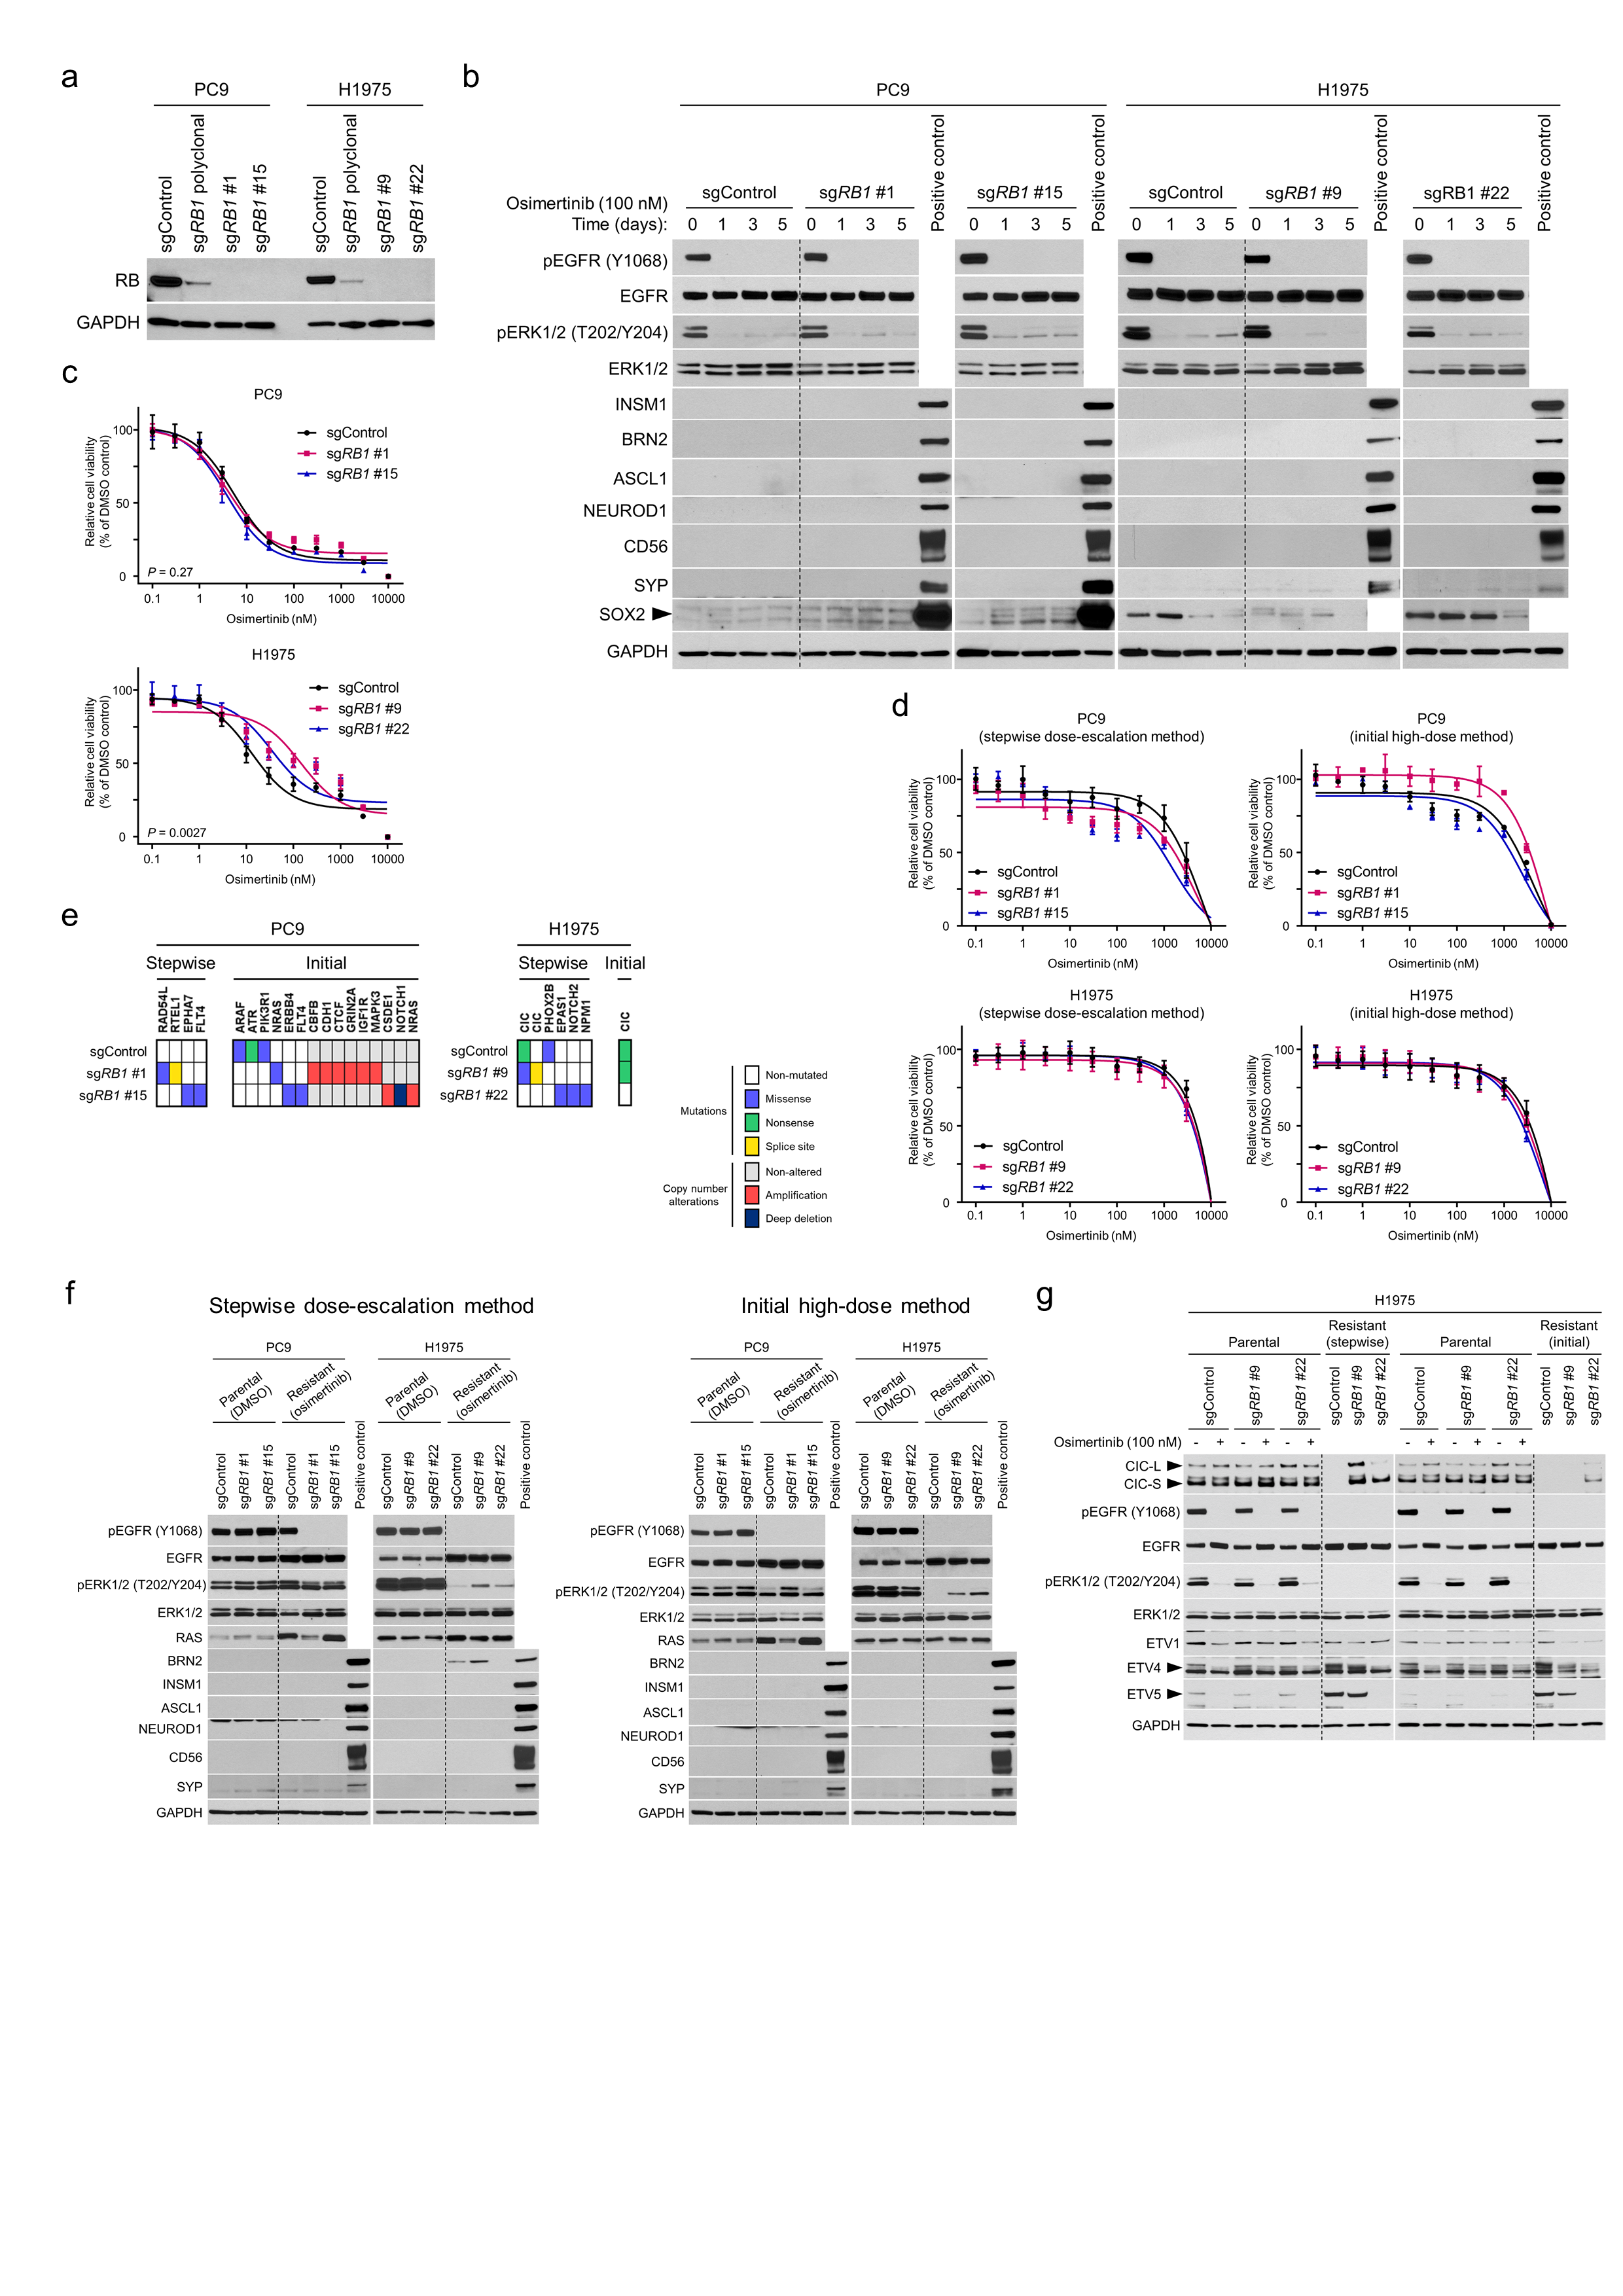

Supplement: supp [file elife-66524-supp-v1.zip › elife_poa_e66524_Figure_6_figure_supplement_4.tif]

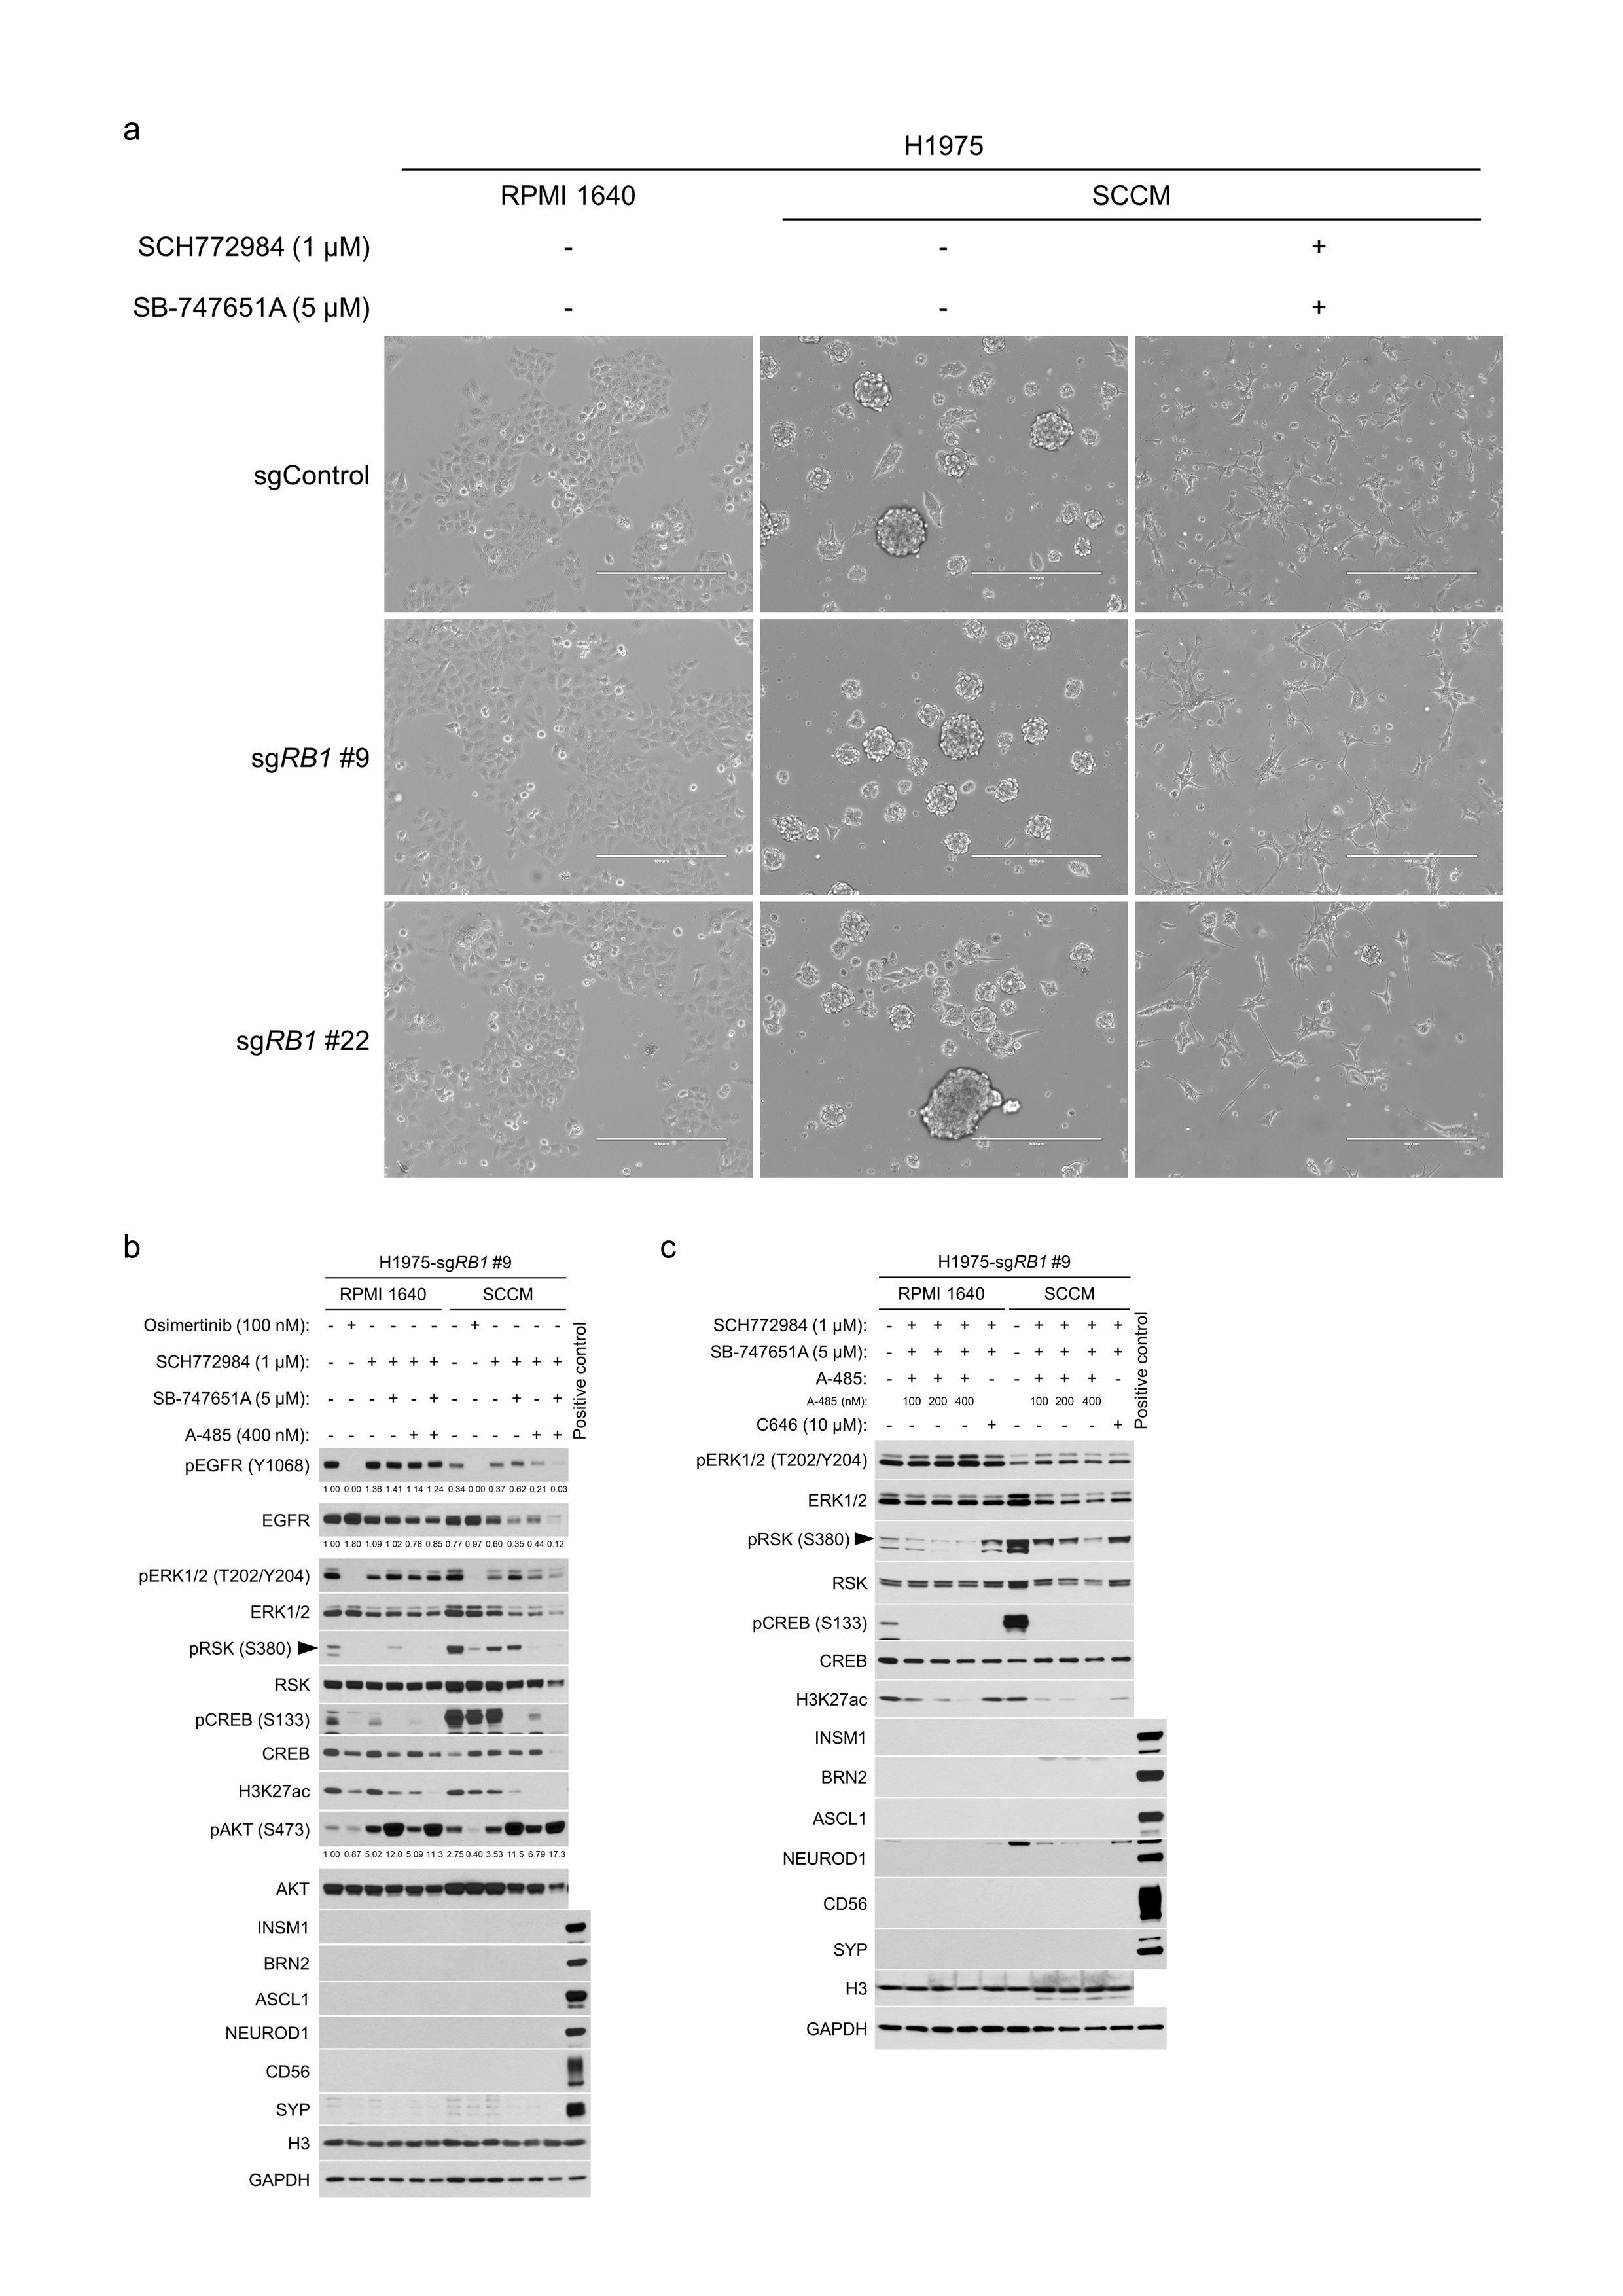

Supplement: supp [file elife-66524-supp-v1.zip › elife_poa_e66524_Figure_6_figure_supplement_5.tif]
